# Supplementary material for: Synthesis of ABx and ABxC poly(ester-ether) polymers: polymer sequences and effects of Bx and BxC units on thermal properties
Source: Royal Society of Chemistry journal article supplement (doi:10.1039/d3py00605k), 2023-01-01
Supplement: d3py00605k1.pdf [file d3py00605k1.pdf]

## Electronic Supplementary Information

### Synthesis of $AB_x$ and $AB_xC$ poly(ester-ether): polymer sequences and effects of $B_x$ and $B_xC$ units on thermal properties

Nattawat Jabprakon, Phongnarin Chumsaeng and Khamphée Phomphrai\*

Department of Materials Science and Engineering, School of Molecular Science and Engineering,  
Vidyasirimedhi Institute of Science and Technology (VISTEC), WangChan, Rayong 21210, Thailand.

E-mail: [khamphée.p@vistec.ac.th](mailto:khamphée.p@vistec.ac.th)

# 1. Calculation of monomer conversion, degree polymerization and polymer Compositions

(With some modifications from R. W. F. Kerr and C. K. Williams, *J. Am. Chem. Soc.* **2022**, *144*, 6882-6893.)

## 1.1 Copolymers from CHO and cyclic anhydrides

### Calculation of monomer conversion

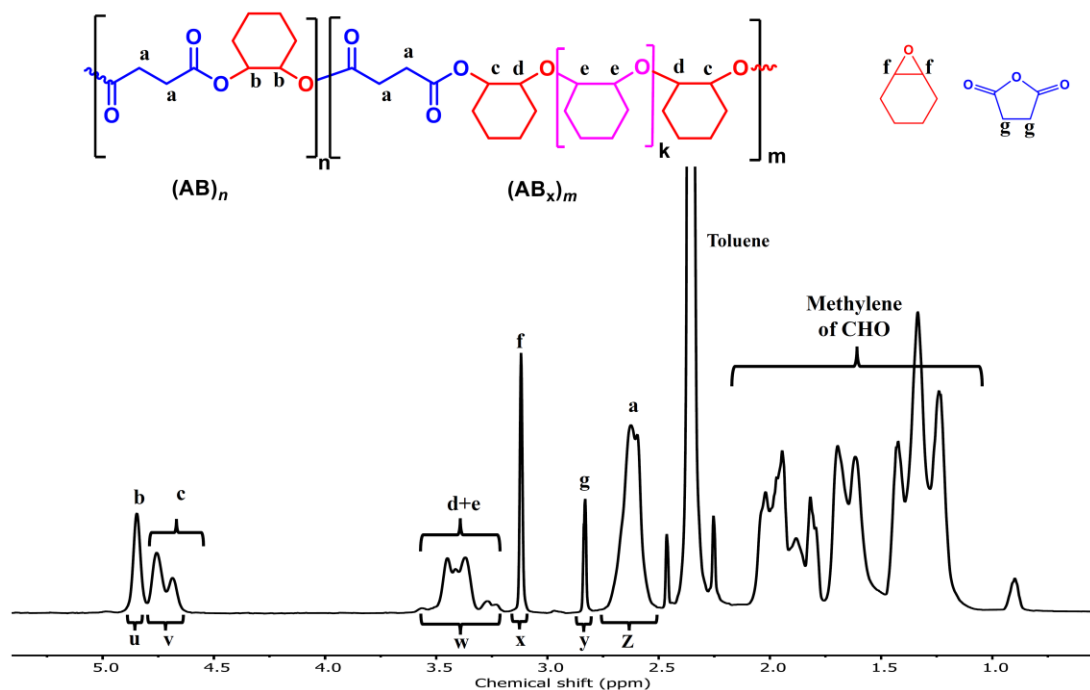

From <sup>1</sup>H NMR of the crude mixture in CDCl<sub>3</sub> shown above, the SA conversion was determined from the integration of protons from the remaining and polymerized SA monomers as shown below.

$$SA \text{ conversion } \% = \frac{z}{y + z} \times 100\%$$

Where y and z are the integration of protons g and a, respectively.

From  $^1\text{H}$  NMR of the crude mixture in  $\text{CDCl}_3$ , the CHO conversion was determined from the integration of the methine protons from the remaining and polymerized CHO monomers as shown below.

$$\text{CHO conversion } \% = \frac{u + v + w}{x + u + v + w} \times 100\%$$

Where  $u$ ,  $v$ ,  $w$ , and  $x$  are the integration of protons  $b$ ,  $c$ ,  $d+e$ , and  $f$ , respectively. For other cyclic anhydrides, the monomer conversion can be calculated similarly.

Finally, the degree of polymerization (DP) of CHO and SA can be calculated as follows.

$$\text{DP of SA} = \text{SA conversion}(\%) \times \frac{[\text{SA}]_0}{[\text{Sn}]_0}$$

$$\text{DP of CHO} = \text{CHO conversion}(\%) \times \frac{[\text{CHO}]_0}{[\text{Sn}]_0}$$

### Calculation of polymer compositions

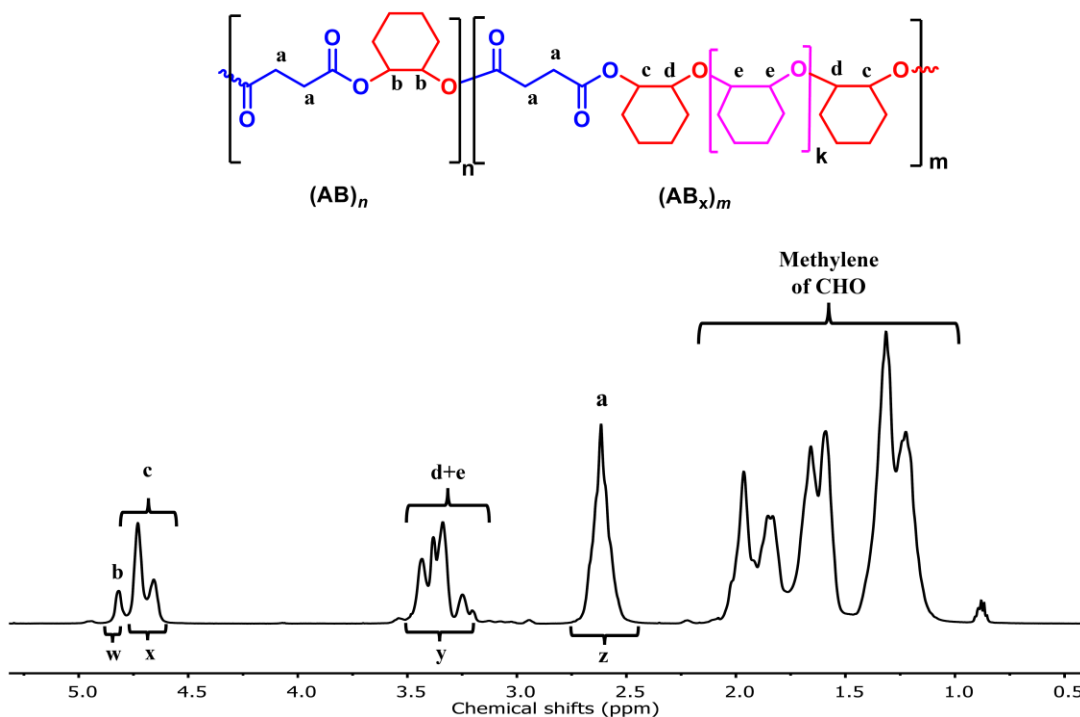

From  $^1\text{H}$  NMR of the purified polymer in  $\text{CDCl}_3$  shown above, the percentage compositions of  $(\text{AB})_n$  and  $(\text{AB}_x)_m$  were defined as the percentage of cyclic anhydride (A) in  $(\text{AB})_n$  and in  $(\text{AB}_x)_m$ , respectively. Although the  $\text{CH}_2$  protons of cyclic anhydrides (A) in  $(\text{AB})_n$  and  $(\text{AB}_x)_m$  comes at the same chemical shift around 2.62 ppm (peak *a*), they can be traced back from different chemical shifts of CHO (peaks *b* and *c*, for example).  $^1\text{H}$  NMR spectroscopy was used to analyze the resultant copolymers using the following equations.

For  $(\text{AB})_n$  polymer, the number of protons *a* is twice as many as protons *b*. Therefore,  $\%(\text{AB})_n$  can be calculated as follows.

$$\%(\text{AB})_n = \frac{2w}{z} \times 100\%$$

$$\%(\text{AB}_x)_m = 100\% - \%(\text{AB})_n$$

$$x \text{ (average number of B units in } (\text{AB}_x)_m) = (x+y)/x$$

Where *w*, *x*, *y*, and *z* are the integration of *b*, *c*, *d+e*, and *a* signals, respectively. Note that  $(\text{AB})_n$  and  $(\text{AB}_x)_m$  polymers are treated as different polymer sequences. Therefore, the calculation of *x* values excludes B units in the  $(\text{AB})_n$  polymer. For other cyclic anhydrides,  $(\text{AB})_n$  and  $(\text{AB}_x)_m$  can be calculated similarly.

**Note:** Protons *c* appeared to consist of two peaks (left and right) in the range of 4.6-4.8 ppm. The taller left peak at 4.73 ppm is syndiotactic  $(\text{CHO})_2$  units and the smaller right peak at 4.65 ppm is isotactic  $(\text{CHO})_2$  units. Please see our assignment in *Macromolecules* **2020**, *53*, 9869-9877 for more details.

## 1.2 Copolymers from CHO, cyclic anhydrides, and THF or 1,4-dioxane

### Calculation of the degrees of polymerization for each monomer (in the presence of THF)

From  $^1\text{H}$  NMR of crude mixture in  $\text{CDCl}_3$ , the SA conversion was measured by the integration ratio of protons from remaining and polymerized SA monomers as shown below.

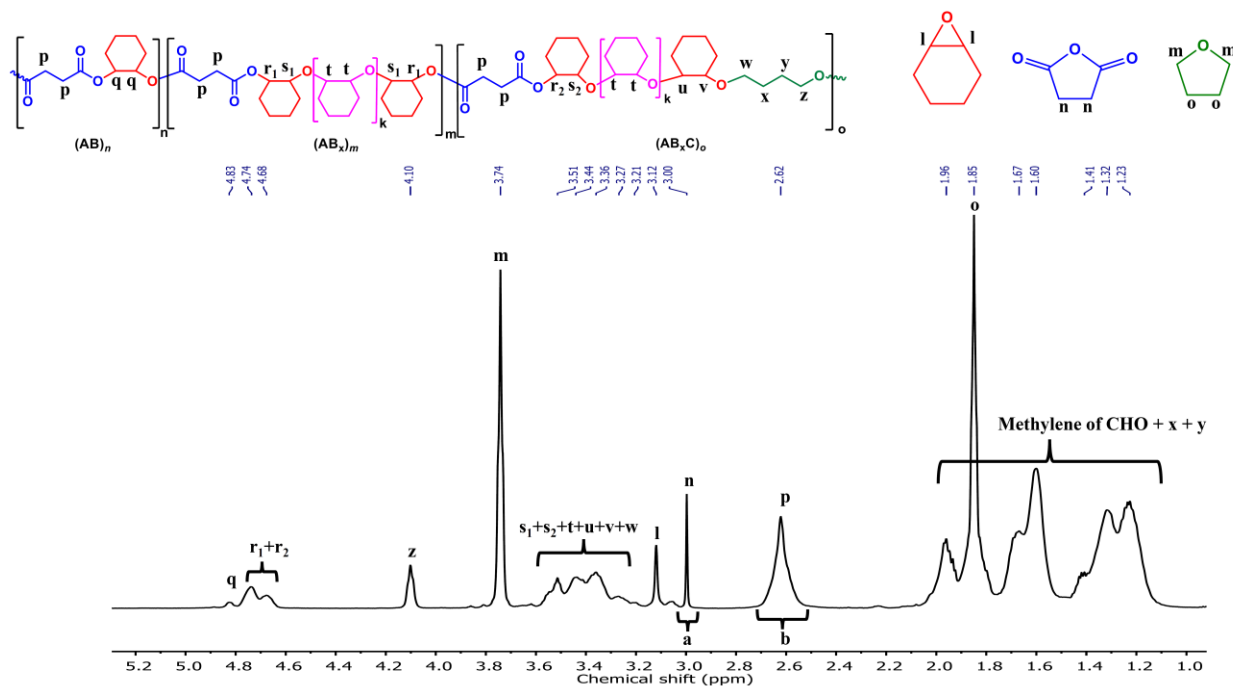

$$SA \text{ conversion } \% = \frac{b}{a + b} \times 100\%$$

Where  $a$  and  $b$  are the integration of protons  $n$  and  $p$ , respectively.

From this, degree of polymerization (DP) for SA can be calculated as shown.

$$DP \text{ of SA} = SA \text{ conversion}(\%) \times \frac{[\text{SA}]_0}{[\text{Sn}]_0}$$

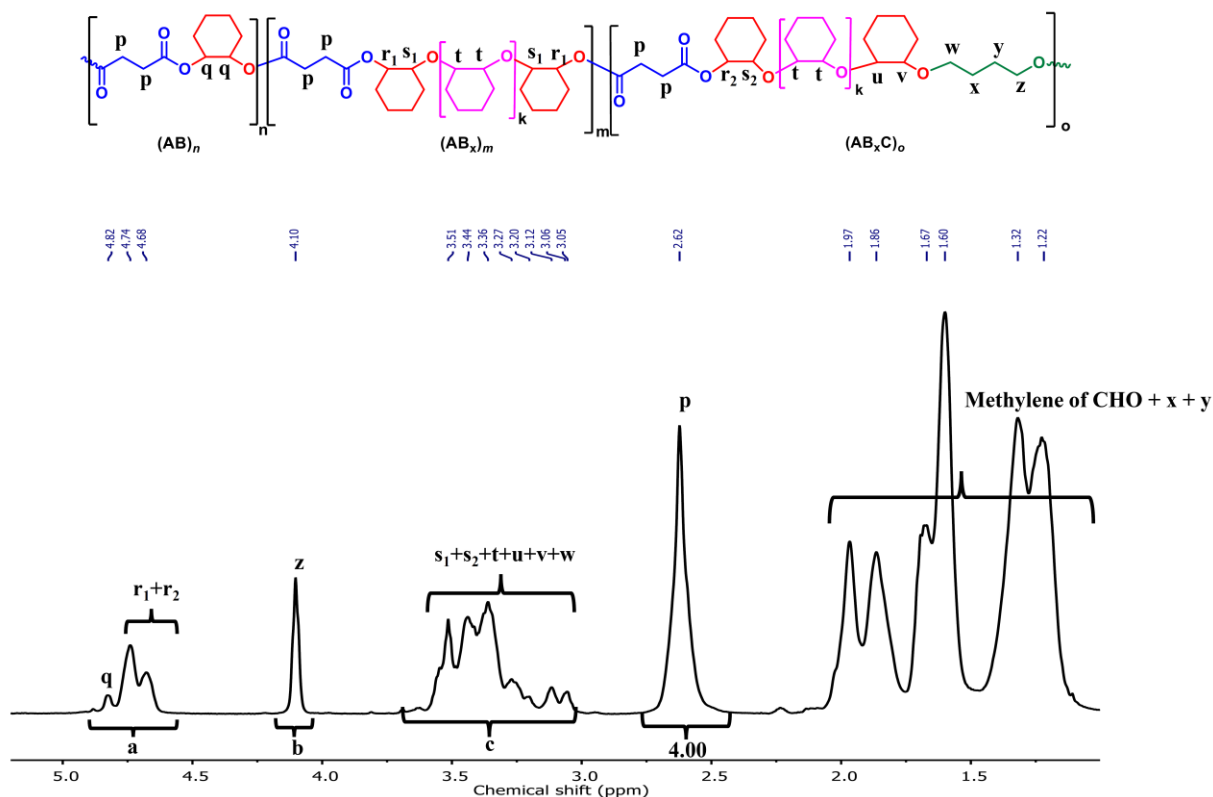

Because THF is highly volatile, conversion of THF cannot be calculated directly from unreacted THF. From  $^1\text{H}$  NMR of the purified polymer in  $\text{CDCl}_3$  shown above, to calculate DP for CHO and THF, the integration of SA protons (protons  $p$  at 2.62 ppm) was first set to 4 protons (4H/ one SA unit). Since protons  $w$  are hidden in the range 3.0-3.7 ppm, they must be subtracted to get the total integration of methine protons of CHO in the polymer. However, the number of protons  $w$  is equal to protons  $z$ . Therefore, the total integration of methine protons of CHO in the polymer can be calculated as follows.

$$\text{Total integration of methine protons of CHO in polymer} = (a+c)-b$$

There are two methine protons in CHO. Therefore, the equivalent of CHO (in relative to one SA) in the polymer can be calculated as follows.

$$\text{Equivalents of CHO in polymer} = \frac{(a + c) - b}{2}$$

The equivalents of THF (in relative to one SA) in polymer can also be calculated similarly as follows.

$$\text{Equivalents of THF in polymer} = \frac{b}{2}$$

Where  $a$ ,  $b$ , and  $c$  are the integration protons  $q+r_1+r_2$ ,  $z$ , and  $s_1+s_2+t+u+v+w$ , respectively.

Finally, the DP of CHO and THF can be calculated in relative to the DP of SA as follows.

$$\text{DP of CHO} = \text{DP of SA} \times \text{Equivalents of CHO in polymer}$$

$$\text{DP of THF} = \text{DP of SA} \times \text{Equivalents of THF in polymer}$$

For MA and PA, the degrees of polymerization for each monomer can be calculated similarly.

### Calculation of polymer selectivity for THF

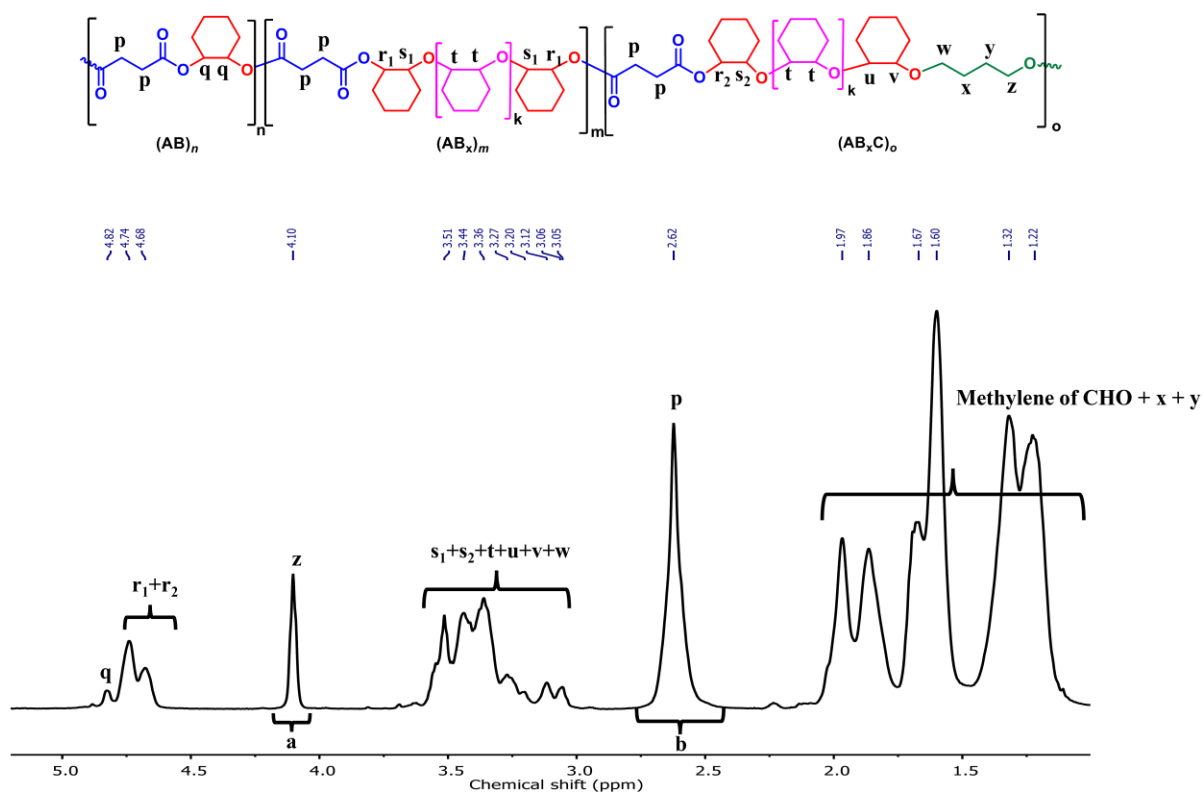

From 2D NMR analysis, the ring-opened THF is always connected to SA. Therefore, the selectivity for THF can be calculated and defined in relative to SA. From <sup>1</sup>H NMR of the purified polymer in CDCl<sub>3</sub>, polymer selectivity (%) for THF was defined and calculated using the integration ratio of protons  $z$  (2 protons/ THF unit) and protons  $p$  (4 protons/SA unit) as follows.

$$\text{Polymer selectivity for THF (\%)} = \frac{\left(\frac{a}{2}\right)}{\left(\frac{b}{4}\right)} \times 100\%$$

Where  $a$ , and  $b$  are the integration ratio of protons  $z$ , and  $p$ , respectively. For MA and PA, polymer selectivity for THF (%) can be calculated similarly.

### Calculation of polymer compositions (in the presence of THF)

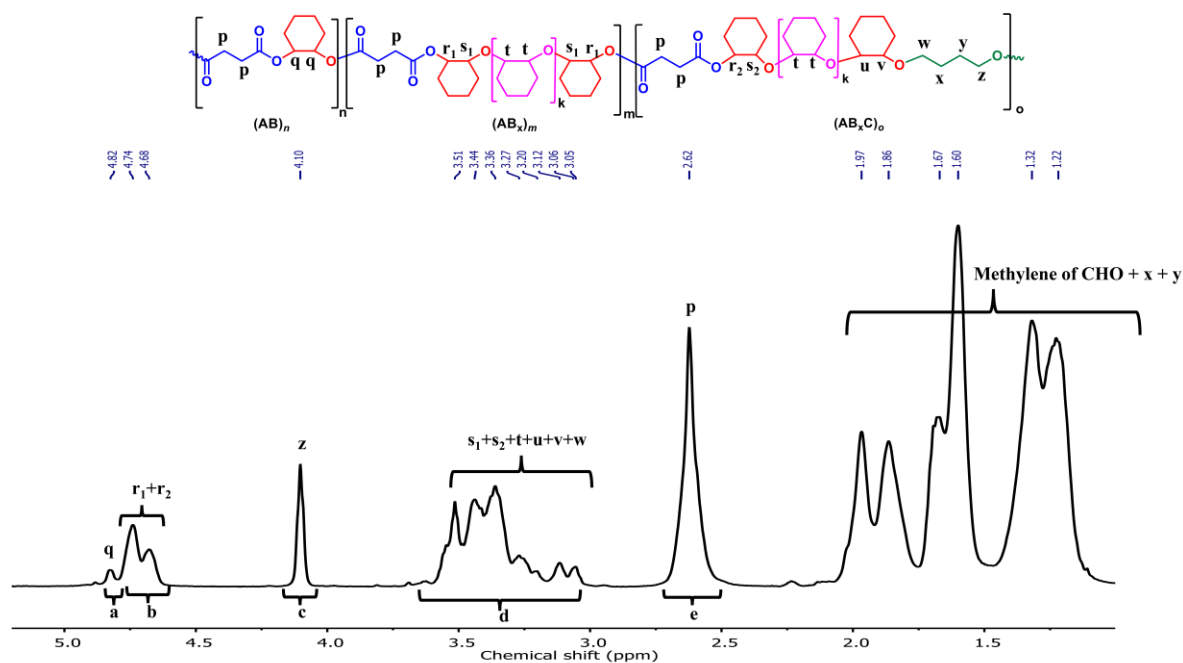

The percent compositions of (AB)<sub>n</sub>, (AB<sub>x</sub>)<sub>m</sub>, and (AB<sub>x</sub>C)<sub>o</sub> were defined as the percentage of cyclic anhydride (A) in (AB)<sub>n</sub>, (AB<sub>x</sub>)<sub>m</sub> and (AB<sub>x</sub>C)<sub>o</sub>, respectively. Although cyclic anhydrides (A) in (AB)<sub>n</sub>, (AB<sub>x</sub>)<sub>m</sub> and (AB<sub>x</sub>C)<sub>o</sub> comes at the same chemical shift around 2.62 ppm ( $p$  peak), they can be derived from different chemical shifts of CHO and THF (peaks  $q$ ,  $r_1$  and  $z$  for example). <sup>1</sup>H NMR spectroscopy was used to analyze the resultant copolymers using the following equations.

$$\% (AB)_n = \frac{2a}{e} \times 100\%$$



Since the integration of protons  $r_2 = \text{proton } z \div 2$ , the  $\%(AB_x)_m$  can be calculated as follows.

$$\%(AB_x)_m = \frac{2(b - \frac{c}{2})}{e} \times 100\%$$

$$\%(AB_xC)_o = \frac{2c}{e} \times 100\%$$

Because the B units in  $(AB_x)_m$  and  $(AB_xC)_o$  are indistinguishable, the ether lengths in both  $(AB_x)_m$  and  $(AB_xC)_o$  are averaged. Therefore, the  $x$  (average number of B units in  $(AB_x)_m$  and  $(AB_xC)_o$ ) can be calculated as the equivalents of CHO in relative to SA in  $(AB_x)_m$  and  $(AB_xC)_o$  as follows.

**The integration of methine proton of CHO in  $(AB_x)_m$  and  $(AB_xC)_o = b+d-c$  (2 protons/unit)**

**The integration of SA in  $(AB_x)_m$  and  $(AB_xC)_o = e-2a$  (4 protons/unit)**

$$x = \frac{(\frac{b+d-c}{2})}{(\frac{e-2a}{4})}$$

Where  $a$ ,  $(b - \frac{c}{2})$ ,  $c$ ,  $d$  and  $e$  are the integration of protons  $q$ ,  $r_1$ ,  $z$ ,  $s_1+s_2+t+u+v+w$ , and  $p$ , respectively. For other cyclic anhydrides,  $(AB)_n$ ,  $(AB_x)_m$ ,  $(AB_xC)_o$  and average  $x$  can be calculated similarly.

## Calculation of the DP for each monomer (in the presence of 1,4-dioxane)

From  $^1\text{H}$  NMR of the crude mixture, the PA conversion was measured by the integration ratio of protons from remaining and polymerized PA monomers as shown in the following.

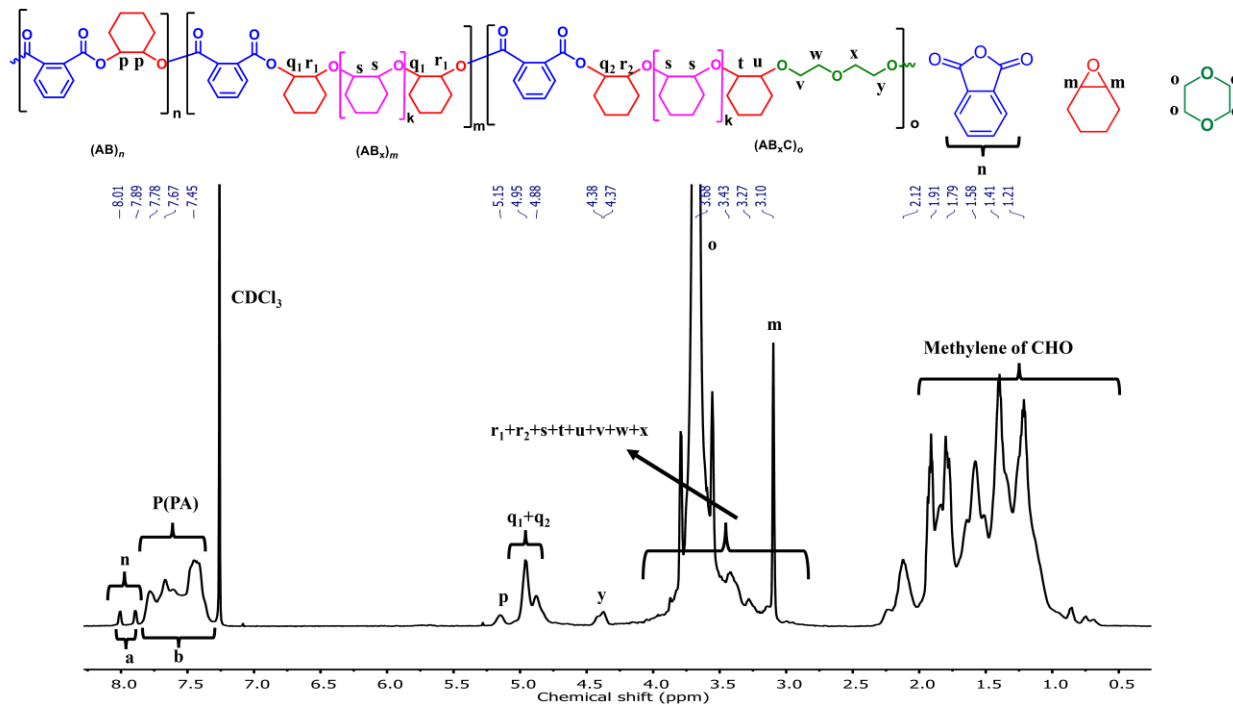

$$PA \text{ conversion } \% = \frac{b}{a + b} \times 100\%$$

Where  $a$  and  $b$  are the integration of protons  $n$  and polymerized PA, respectively.

From this, DP for PA can be calculated as follows.

$$DP \text{ for } PA = PA \text{ conversion } (\%) \times \frac{[PA]_0}{[Sn]_0}$$

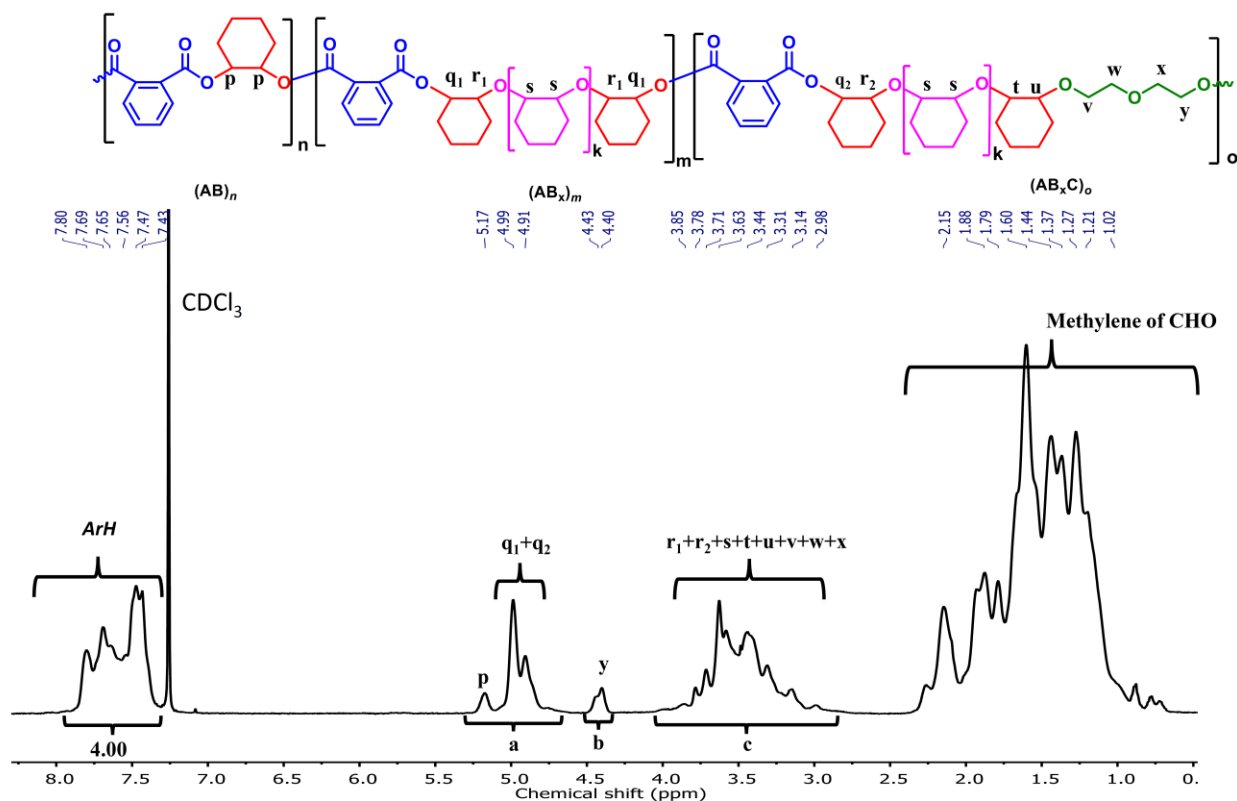

From  $^1\text{H NMR}$  of the purified polymer shown above, to calculate DP for CHO and dioxane, the integration of PA protons ( $ArH$  protons at 7.43-7.80 ppm) was first set to 4 protons (4H/one PA unit). Since protons  $v$ ,  $w$ , and  $x$  are hidden in the range 3.0-3.8 ppm, they must be subtracted to get the total integration of CHO in the polymer. However, the number of protons  $v$ ,  $w$ , and  $x$  are equal to protons  $y$ . Therefore, the total integration of methine protons of CHO in the polymer can be calculated as follows.

$$\text{Total integration of methine protons of CHO} = (a+c)-3b$$

There are two methine protons in CHO. Therefore, the equivalent of CHO (in relative to one PA) in the polymer can be calculated as follows.

$$\text{Equivalents of CHO in polymer} = \frac{a + c - 3b}{2}$$

The equivalents of 1,4- dioxane (in relative to one PA) in polymer can also be calculated similarly as follows.

$$\text{Equivalents of 1,4 - dioxane in polymer} = \frac{b}{2}$$

Where  $a$ ,  $b$ , and  $c$  are the integration of protons  $p+q_1+q_2$ ,  $y$  and  $r_1+r_2+s+t+u+v+w+x$ , respectively. Finally, the DP of CHO and 1,4-dioxane can be calculated in relative to the DP of PA as follows.

$$DP \text{ of CHO} = DP \text{ of PA} \times \text{Equivalents of CHO in polymer}$$

$$DP \text{ of 1,4-dioxane} = DP \text{ of PA} \times \text{Equivalents of 1,4-dioxane in polymer}$$

For SA, the degrees of polymerization for each monomer can be calculated similarly.

### Calculation of polymer selectivity for 1,4-dioxane

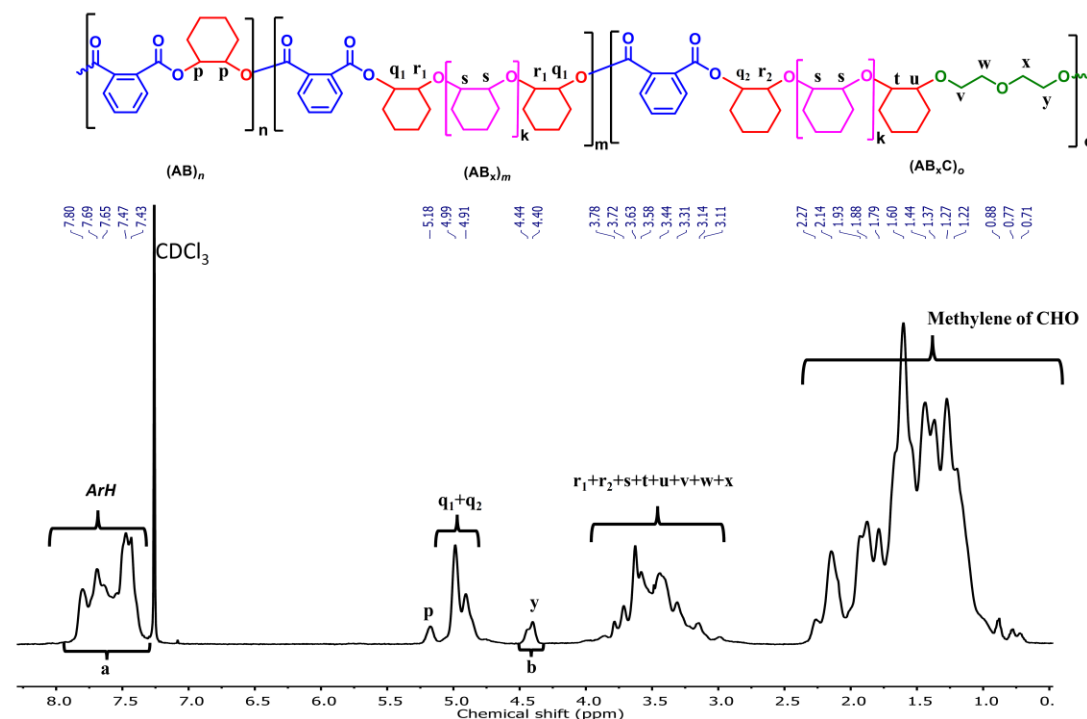

Similar to THF, the ring-opened 1,4-dioxane is always connected to PA. Therefore, the selectivity for 1,4-dioxane can be calculated and defined in relative to PA. From  $^1\text{H}$  NMR of the purified polymer, polymer selectivity (%) for 1,4-dioxane was defined and calculated using the integration ratio of protons  $y$  (2 protons/unit) and protons  $ArH$  (4 protons/PA unit) as follows.

$$\text{Polymer selectivity for 1,4-dioxane (\%)} = \frac{\left(\frac{b}{2}\right)}{\left(\frac{a}{4}\right)} \times 100\%$$

Where  $a$ , and  $b$  are the integration ratio of protons  $ArH$ , and  $y$ , respectively. For SA, polymer selectivity for 1,4-dioxane can be calculated similarly.

### Calculation of polymer compositions (in the presence of 1,4-dioxane)

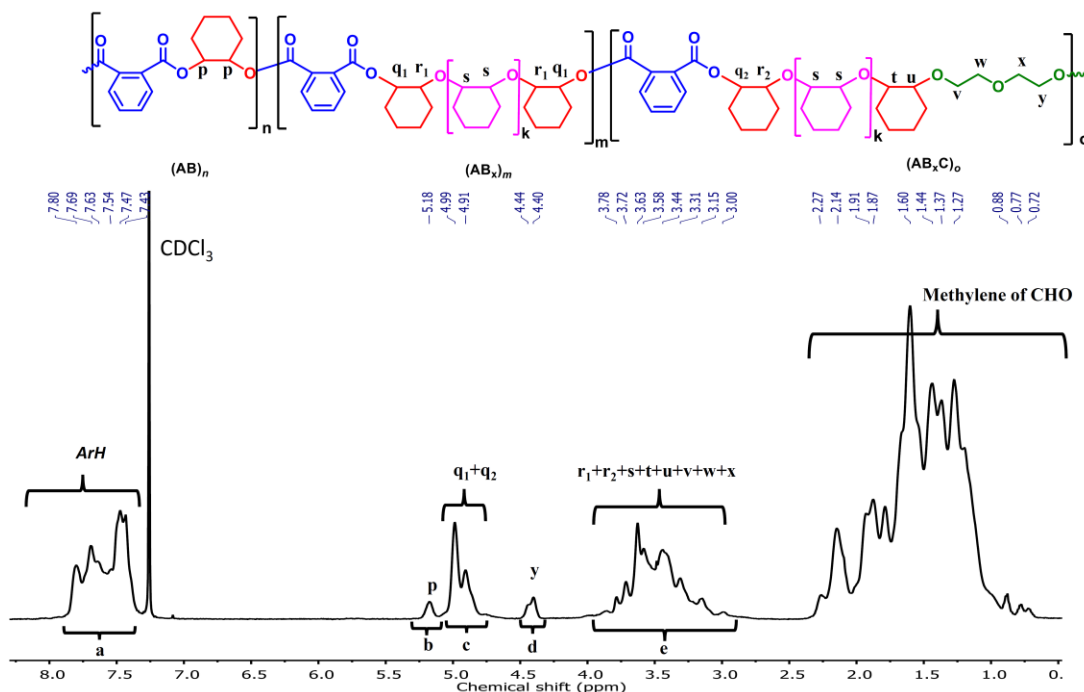

The percent compositions of  $(AB)_n$ ,  $(AB_x)_m$ , and  $(AB_xC)_o$  were defined as the percentage of cyclic anhydride (A) in  $(AB)_n$ ,  $(AB_x)_m$  and  $(AB_xC)_o$  respectively. Although cyclic anhydrides (A) in  $(AB)_n$ ,  $(AB_x)_m$  and  $(AB_xC)_o$  comes at the same chemical shift around 7.43-7.80 ppm ( $ArH$  peak), they can be derived from different chemical shifts of CHO and 1,4-dioxane (peaks  $p$ ,  $q_1$  and  $y$  for example). Using similar analysis as in THF,  $^1\text{H}$  NMR spectroscopy was used to analyze the resultant copolymers using the following equations.

$$\% (AB)_n = \frac{2b}{a} \times 100 \%$$

$$\% (AB_x)_m = \frac{2(c - \frac{d}{2})}{a} \times 100\%$$

$$\% (AB_xC)_o = \frac{2d}{a} \times 100\%$$

Because the B units in  $(AB_x)_m$  and  $(AB_xC)_o$  are indistinguishable, the ether lengths in both  $(AB_x)_m$  and  $(AB_xC)_o$  are averaged. Therefore, the  $x$  (average number of B units in  $(AB_x)_m$  and  $(AB_xC)_o$ ) can be calculated as the equivalents of CHO in relative to PA in  $(AB_x)_m$  and  $(AB_xC)_o$  as follows.

**The integration of methine proton of CHO in  $(AB_x)_m$  and  $(AB_xC)_o = c+e-3d$  (2 protons/unit)**

**The integration of PA in  $(AB_x)_m$  and  $(AB_xC)_o = a-2b$  (4 protons/unit)**

The average number of B ( $x$ ) can then be calculated as follows.

$$x = \frac{\left(\frac{c + e - 3d}{2}\right)}{\left(\frac{a - 2b}{4}\right)}$$

Where  $a$ ,  $b$ ,  $(c - \frac{d}{2})$ ,  $d$  and  $e$  are the integration ratio of protons  $ArH$ ,  $p$ ,  $q1$ ,  $y$  and  $r_1+r_2+s+t+u+v+w+x$ , respectively. For other cyclic anhydrides,  $(AB)_n$ ,  $(AB_x)_m$ ,  $(AB_xC)_o$  and average  $x$  can be calculated similarly.

## 2. Results

### 2.1 Copolymerization of epoxides and cyclic anhydrides by tin(II) octanoate

#### NMR spectrum of SA/CHO copolymers

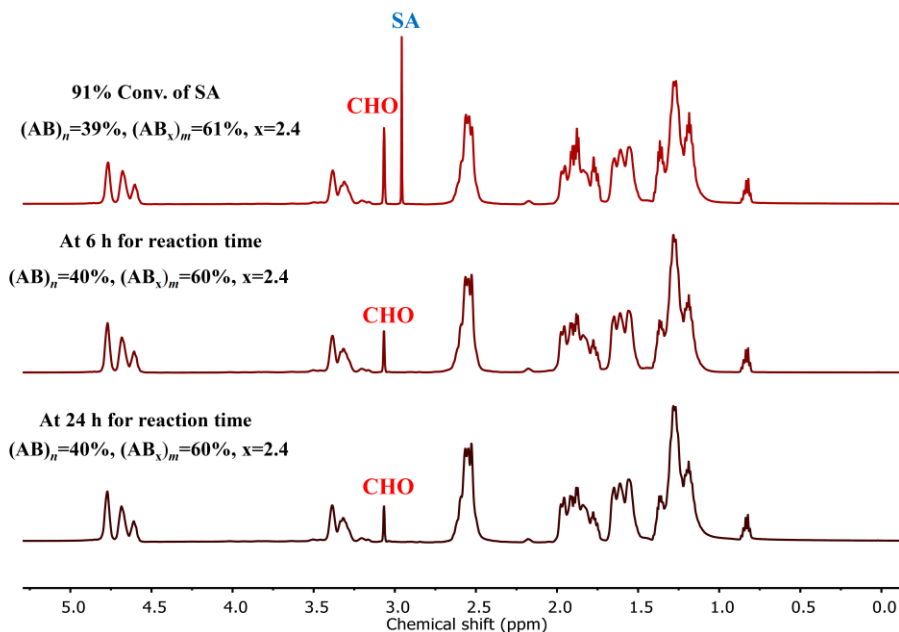

**Figure S1** <sup>1</sup>H NMR spectra (600 MHz, CDCl<sub>3</sub>, 30 °C) of the copolymer from ROCOP of SA and CHO using SA: CHO: SnOct<sub>2</sub> molar ratio of 50:100:1 and [CHO]<sub>0</sub> = 1.0 M at 80 °C with different polymerization time.

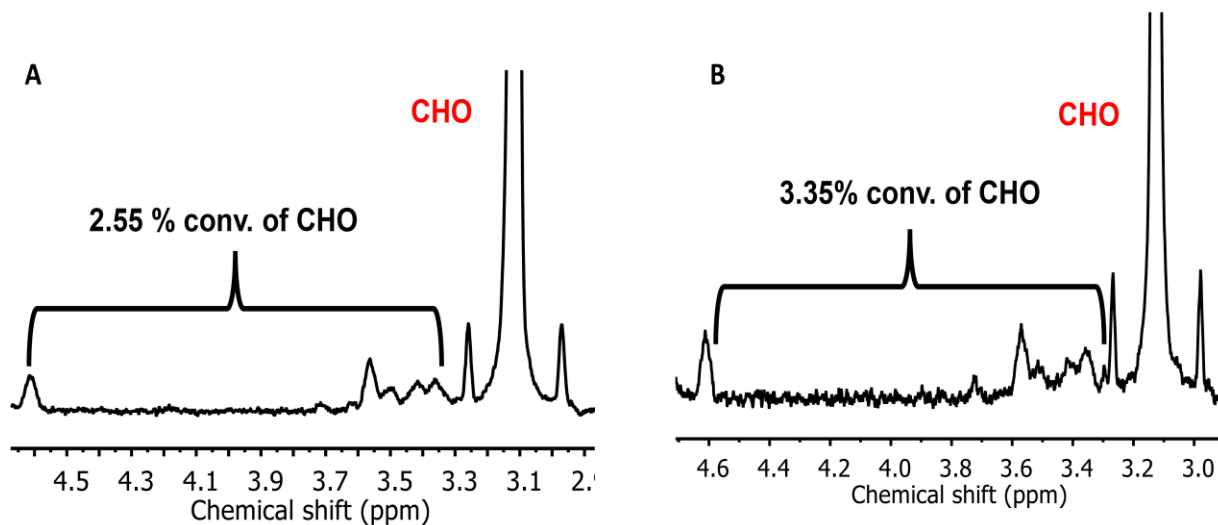

**Figure S2** <sup>1</sup>H NMR spectrum (600 MHz, CDCl<sub>3</sub>, 30 °C) from ROP of CHO using CHO: SnOct<sub>2</sub> molar ratio of 100:1 and [CHO]<sub>0</sub> = 1.0 M at 80 °C: (A) at 3 h and (B) at 24 h.

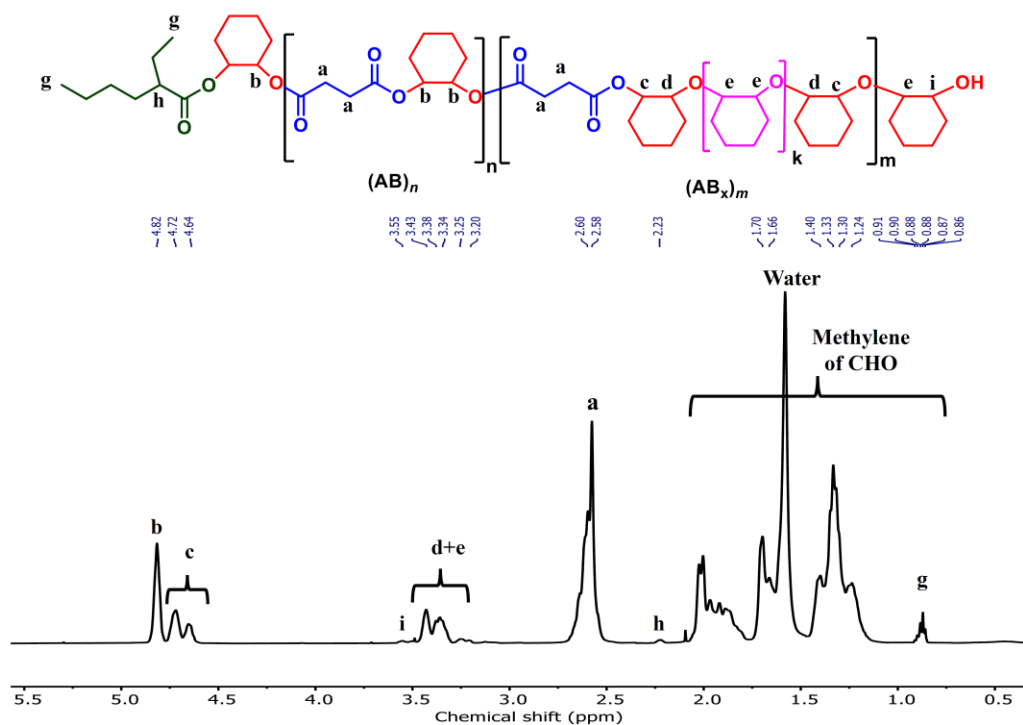

**Figure S3.**  $^1\text{H}$  NMR spectrum (600 MHz,  $\text{CDCl}_3$ , 30  $^\circ\text{C}$ ) of the purified copolymer from ROCOP of SA and CHO using a SA:CHO:SnOct<sub>2</sub> molar ratio of 50:100:1,  $[\text{CHO}]_0 = 1.0$  M at 110  $^\circ\text{C}$  (Table 1, entry 1).

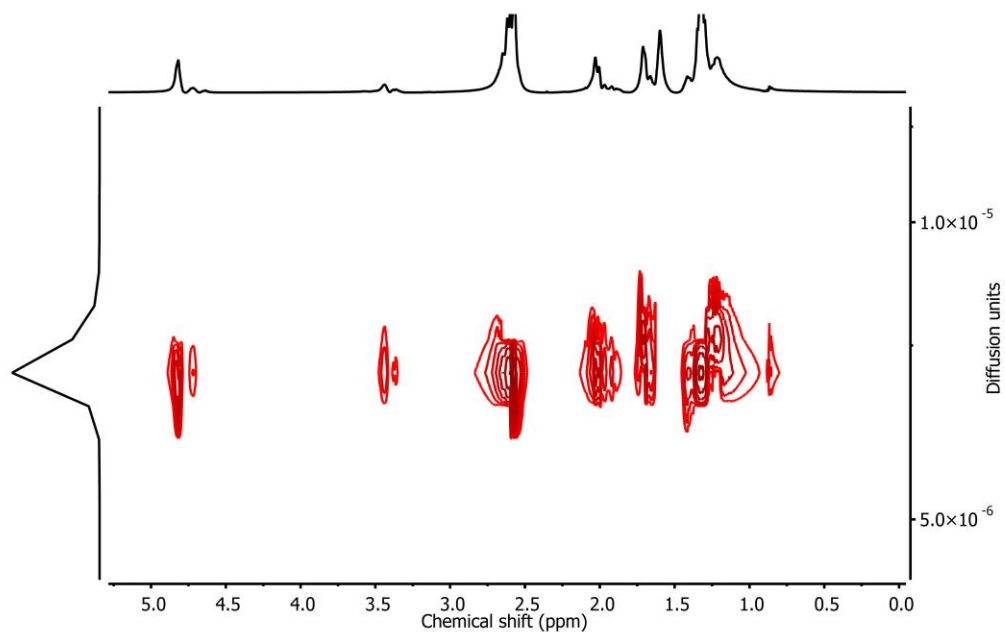

**Figure S4.** DOSY NMR spectrum (600 MHz,  $\text{CDCl}_3$ , 30  $^\circ\text{C}$ ) of the copolymer from ROCOP of SA and CHO using a SA/CHO/SnOct<sub>2</sub> molar ratio of 50:100:1 and  $[\text{CHO}]_0 = 1.0$  M at 110  $^\circ\text{C}$  (Table 1, entry 1).



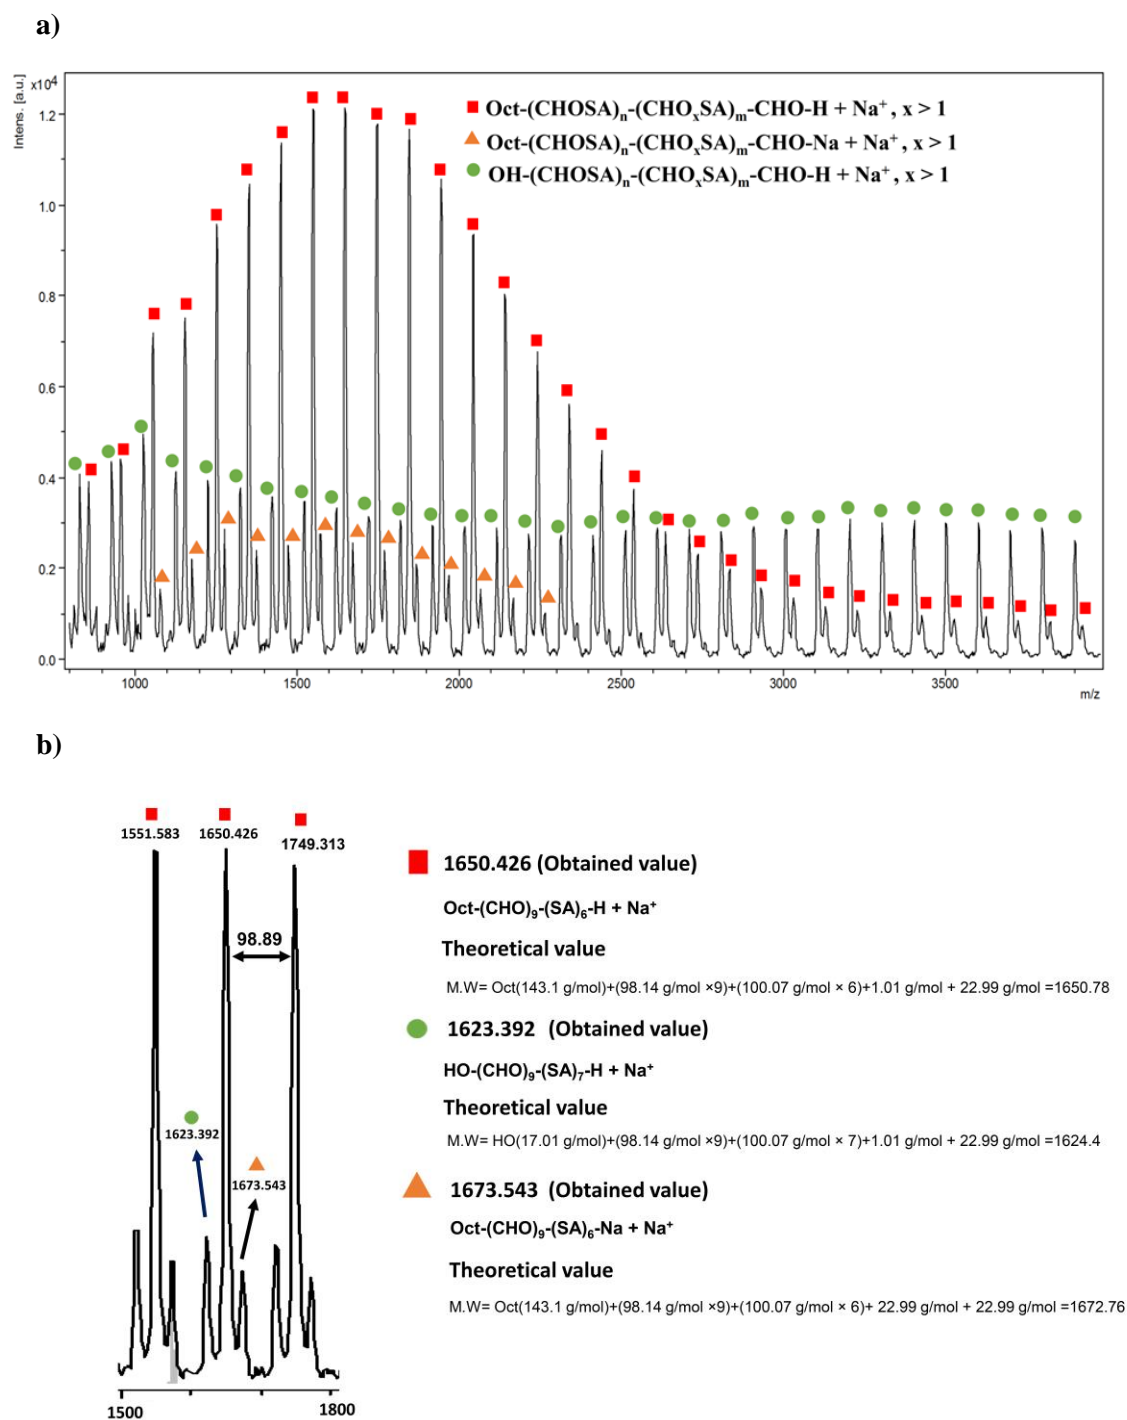

**Figure S5.** a) MALDI-TOF mass spectrum of poly(SA-co-CHO) obtained at low SA conversion (<50%) using  $[\text{CHO}]_0 / [\text{SA}]_0 / [\text{SnOct}_2]_0$  ratio of 100/50/1 at 110 °C and b) the expanded spectrum in the m/z 1500–1800 range and expected structures with theoretical molecular weights of the polymer.

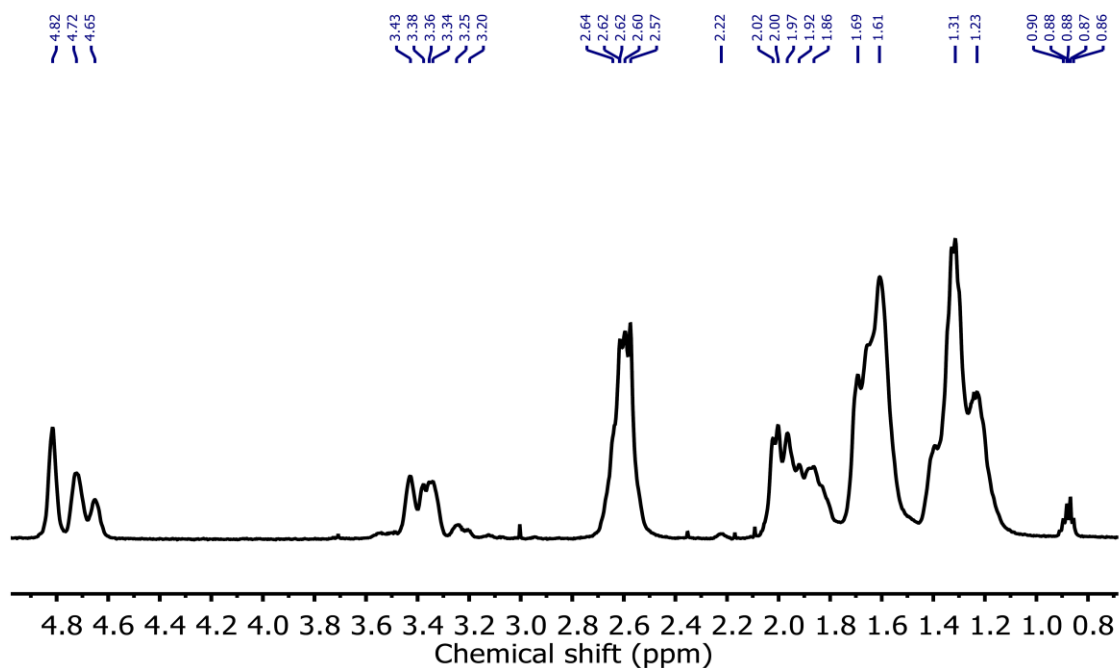

**Figure S6.**  $^1\text{H}$  NMR spectrum (600 MHz,  $\text{CDCl}_3$ , 30  $^\circ\text{C}$ ) of the copolymer from ROCOP of SA and CHO using SA: CHO:  $\text{SnOct}_2$  molar ratio of 50:100:1 and  $[\text{CHO}]_0 = 1.0 \text{ M}$  at 80  $^\circ\text{C}$  (Table 1, entry 2).

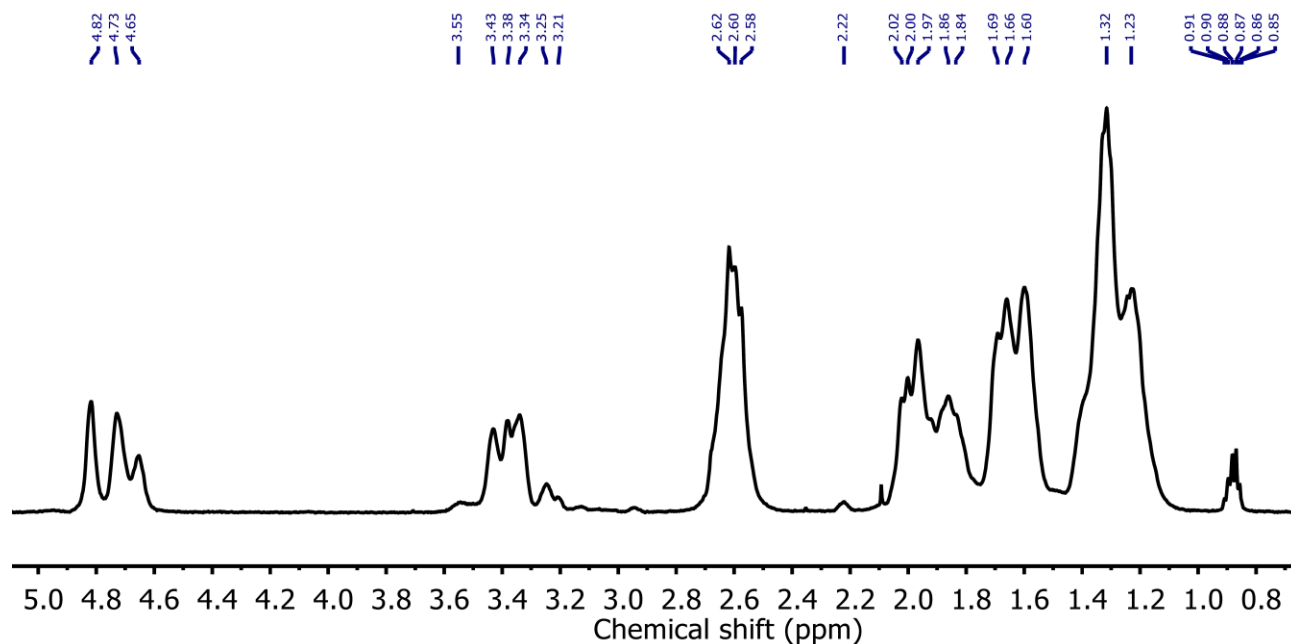

**Figure S7.**  $^1\text{H}$  NMR spectrum (600 MHz,  $\text{CDCl}_3$ , 30  $^\circ\text{C}$ ) of the copolymer from ROCOP of SA and CHO using SA: CHO:  $\text{SnOct}_2$  molar ratio of 50:100:1 and  $[\text{CHO}]_0 = 1.0 \text{ M}$  at 60  $^\circ\text{C}$  (Table 1, entry 3).

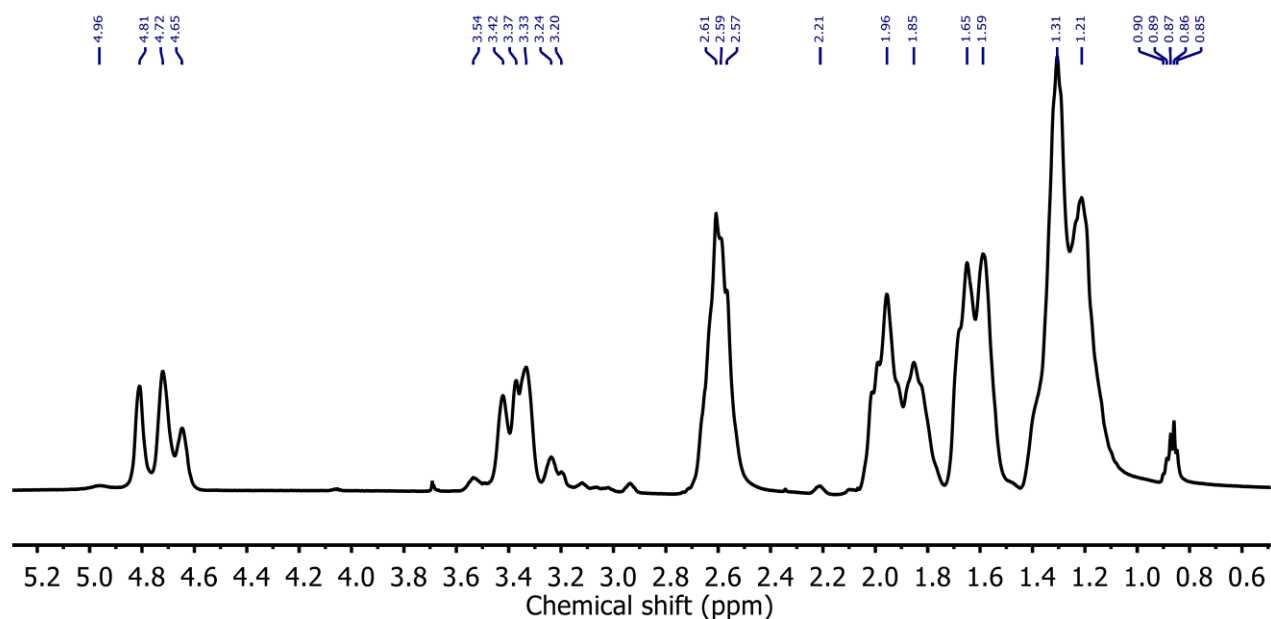

**Figure S8.**  $^1\text{H}$  NMR spectrum (600 MHz,  $\text{CDCl}_3$ , 30  $^\circ\text{C}$ ) of the copolymer from ROCOP of SA and CHO using SA: CHO:  $\text{SnOct}_2$  molar ratio of 50:300:1 and  $[\text{CHO}]_0 = 1.0$  M at 80  $^\circ\text{C}$  (Table 1, entry 4).

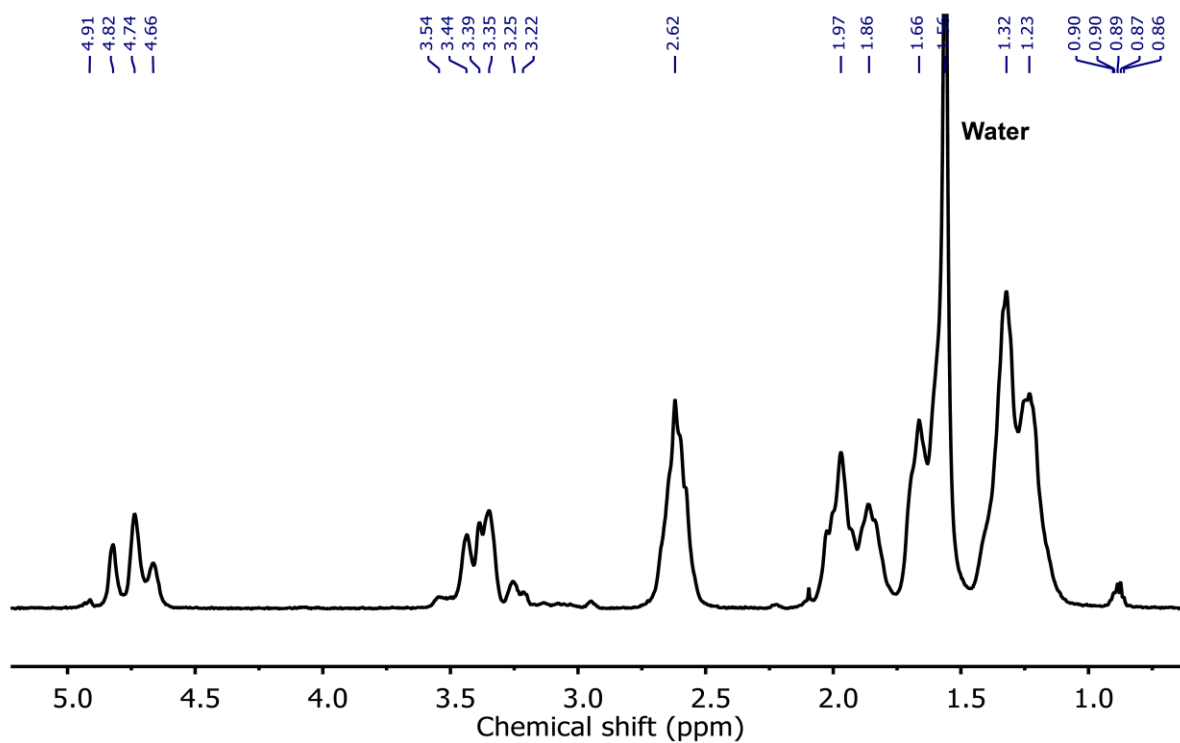

**Figure S9.**  $^1\text{H}$  NMR spectrum (600 MHz,  $\text{CDCl}_3$ , 30  $^\circ\text{C}$ ) of copolymer from ROCOP of SA and CHO using SA: CHO:  $\text{SnOct}_2$  molar ratio of 50:600:1 and  $[\text{CHO}]_0 = 1.0$  M at 80  $^\circ\text{C}$  (Table 1, entry 5).

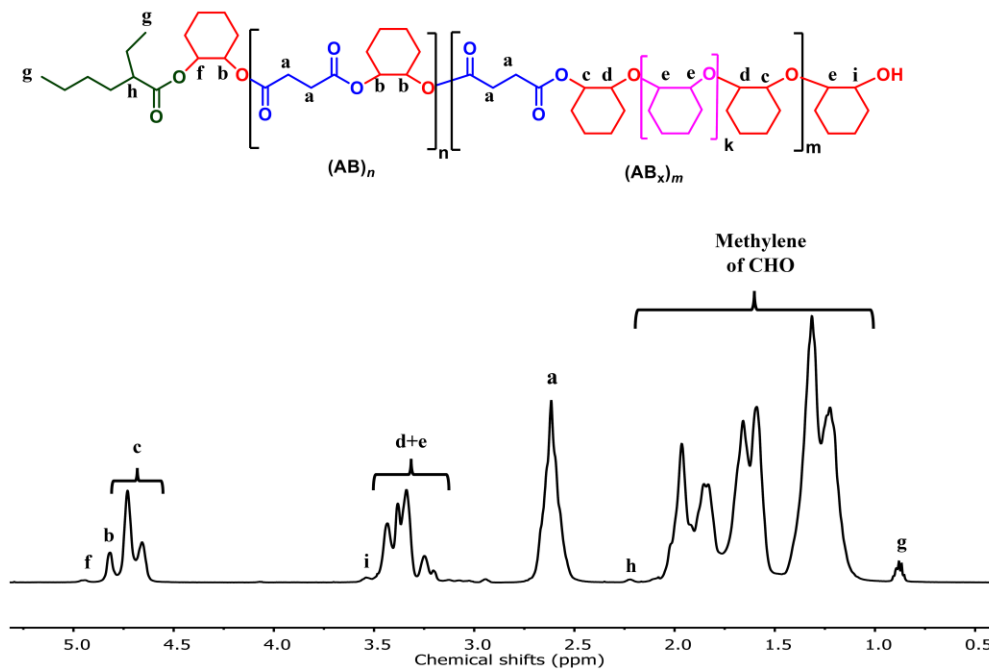

**Figure S10.** <sup>1</sup>H NMR spectrum (600 MHz, CDCl<sub>3</sub>, 30 °C) of the copolymer from ROCOP of SA and CHO using a SA/CHO/SnOct<sub>2</sub> molar ratio of 50:300:1 with CHO concentration of 2.0 M (Table 1, entry 6).

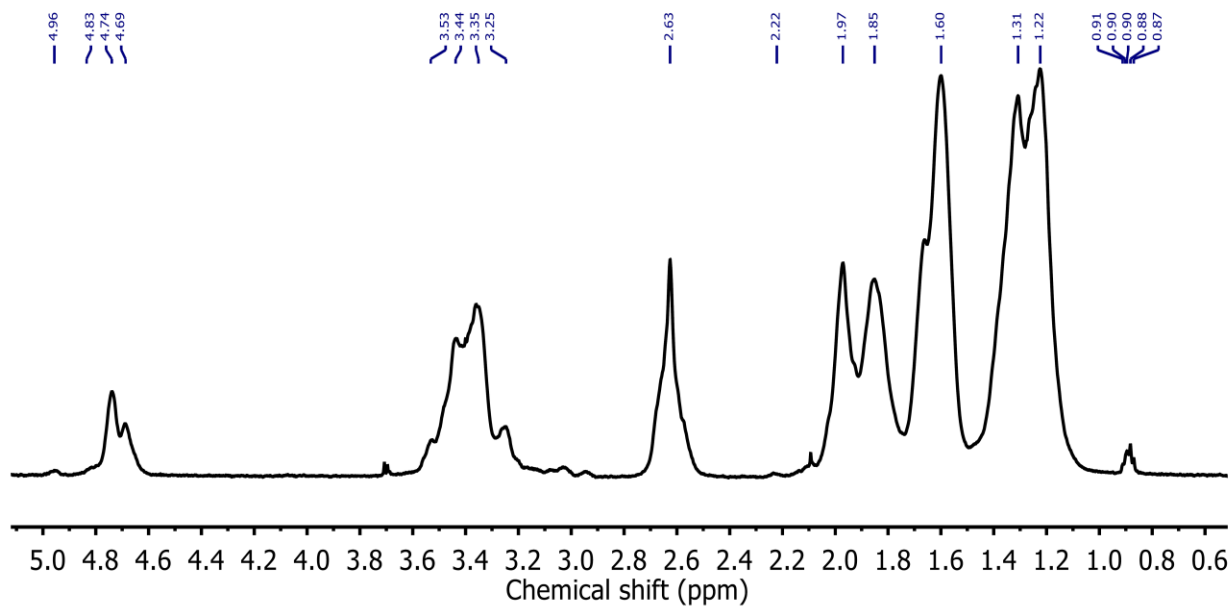

**Figure S11.** <sup>1</sup>H NMR spectrum (600 MHz, CDCl<sub>3</sub>, 30 °C) of the copolymer from ROCOP of SA and CHO using SA: CHO: SnOct<sub>2</sub> molar ratio of 50:300:1 and [CHO]<sub>0</sub> = neat condition at 80 °C (Table 1, entry 7).

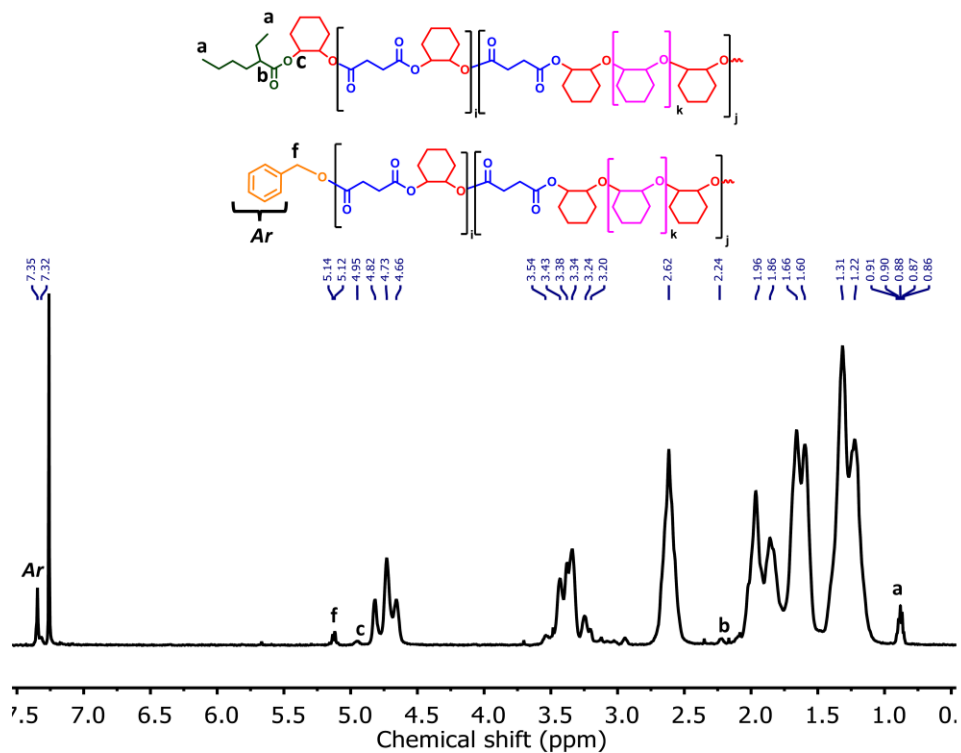

**Figure S12.**  $^1\text{H}$  NMR spectrum (600 MHz,  $\text{CDCl}_3$ , 30  $^\circ\text{C}$ ) of copolymer from ROCOP of SA and CHO using SA: CHO:  $\text{SnOct}_2$ : BnOH molar ratio of 50:300:1:2 and  $[\text{CHO}]_0 = 2.0$  M at 80  $^\circ\text{C}$  (Table 1, entry 8).

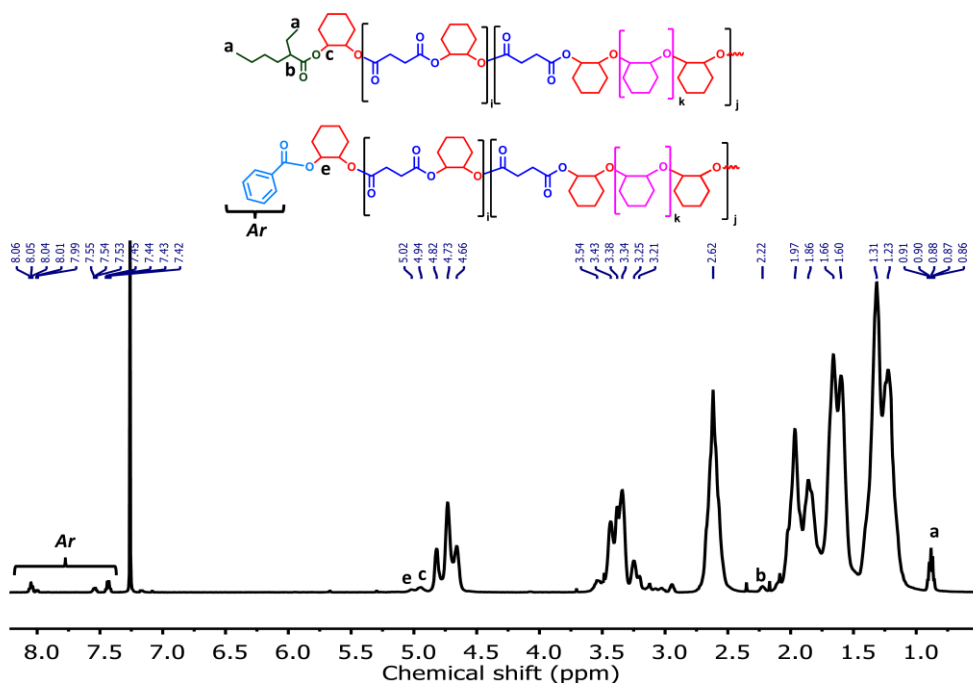

**Figure S13.**  $^1\text{H}$  NMR spectrum (600 MHz,  $\text{CDCl}_3$ , 30  $^\circ\text{C}$ ) of copolymer from ROCOP of SA and CHO using SA: CHO:  $\text{SnOct}_2$ : PhCOOH molar ratio of 50:300:1:2 and  $[\text{CHO}]_0 = 2.0$  M at 80  $^\circ\text{C}$  (Table 1, entry 9).

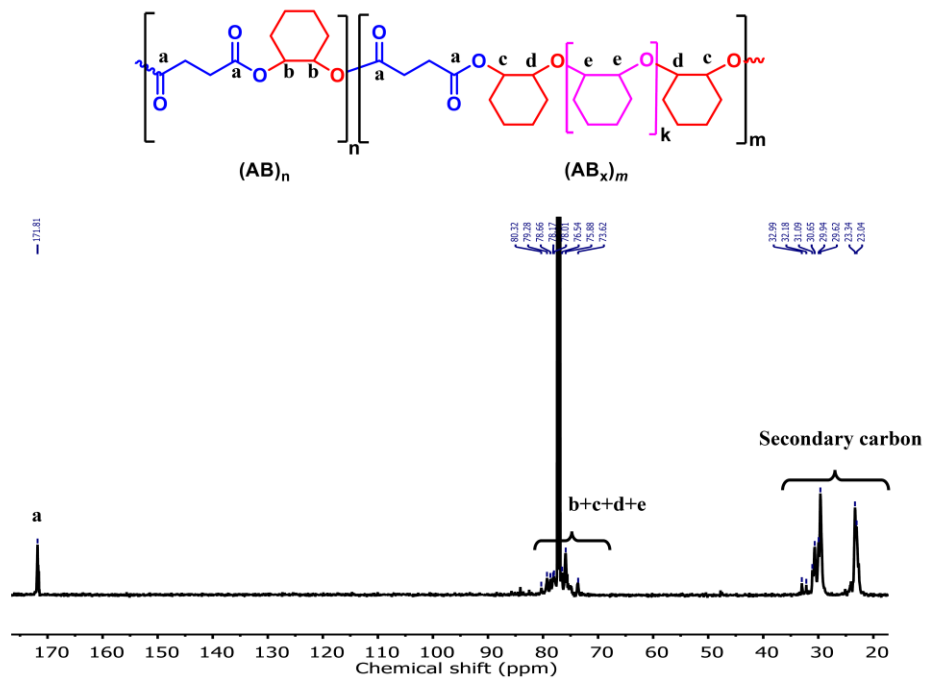

**Figure S14.**  $^{13}\text{C}$  NMR spectrum (150 MHz,  $\text{CDCl}_3$ , 30 °C) of copolymer from ROCOP of SA and CHO using SA: CHO:  $\text{SnOct}_2$ : molar ratio of 50:300:1 and  $[\text{CHO}]_0 = 2.0 \text{ M}$  at 80 °C (Table 1, entry 6).

## NMR spectrum of PA/CHO copolymers

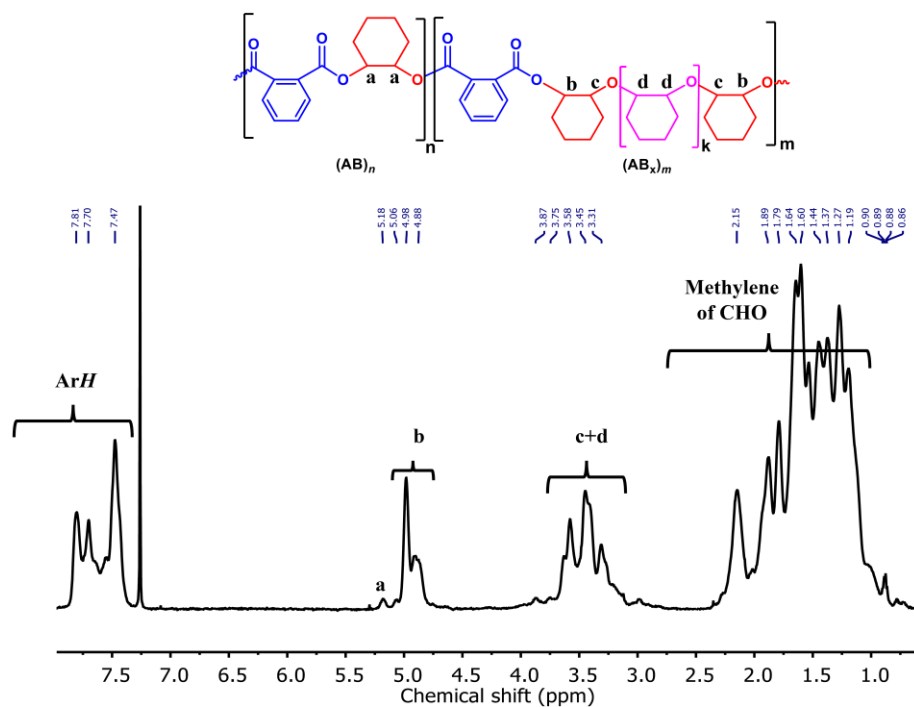

**Figure S15.**  $^1\text{H}$  NMR spectrum (600 MHz,  $\text{CDCl}_3$ , 30 °C) of copolymer from ROCOP of PA and CHO using PA: CHO:  $\text{SnOct}_2$  molar ratio of 50:300:1 and  $[\text{CHO}]_0 = 2.0$  M at 80 °C (Table 1, entry 10).

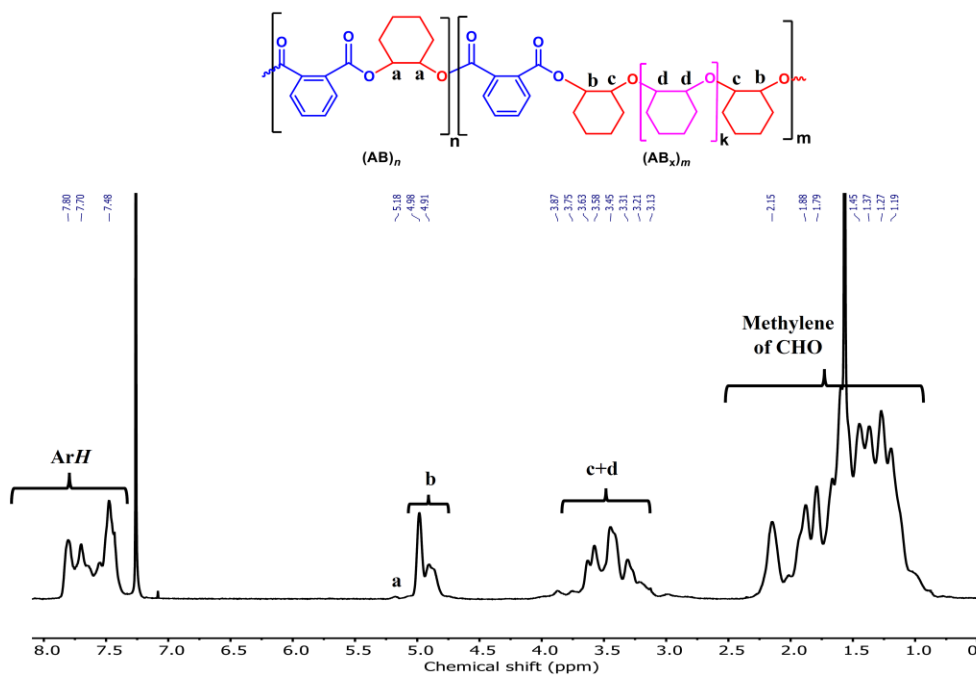

**Figure S16.**  $^1\text{H}$  NMR spectrum (600 MHz,  $\text{CDCl}_3$ , 30 °C) of copolymer from ROCOP of PA and CHO using PA: CHO:  $\text{SnOct}_2$  molar ratio of 250:1500:1 and  $[\text{CHO}]_0 = 2.0$  M at 80 °C (Table 1, entry 15).

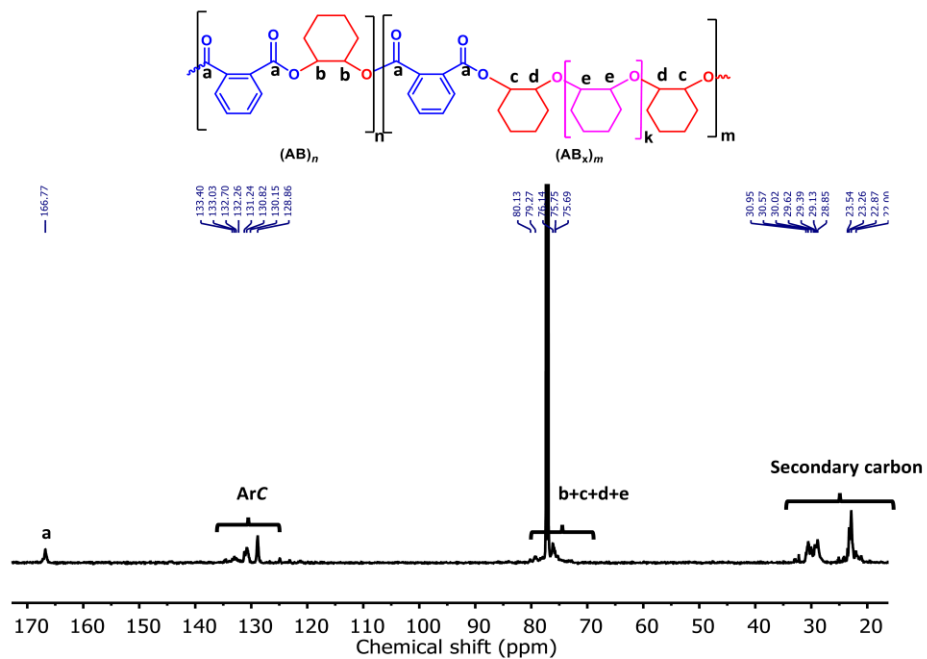

**Figure S17.** <sup>13</sup>C NMR spectrum (150 MHz, CDCl<sub>3</sub>, 30 °C) of copolymer from ROCOP of PA and CHO using PA: CHO: SnOct<sub>2</sub> molar ratio of 50:300:1 and [CHO]<sub>0</sub> = 2.0 M at 80 °C (Table 1, entry 10).



## NMR spectrum of NA/CHO copolymers

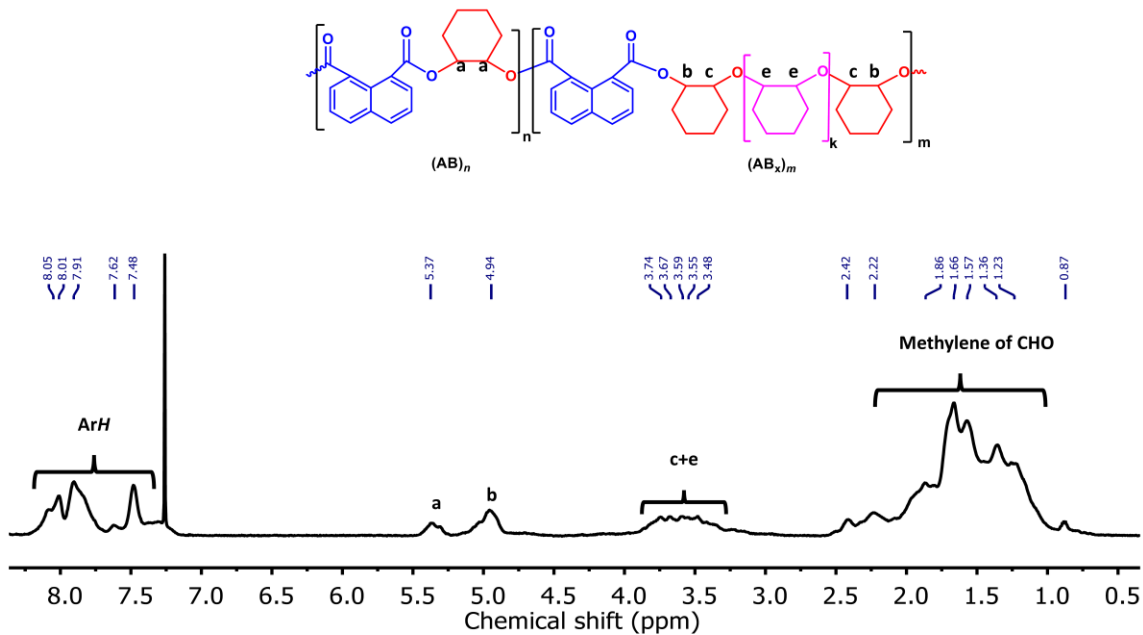

**Figure S18.**  $^1\text{H}$  NMR spectrum (600 MHz,  $\text{CDCl}_3$ , 30 °C) of copolymer from ROCOP of NA and CHO using NA: CHO:  $\text{SnOct}_2$  molar ratio of 50:300:1 and  $[\text{CHO}]_0 = 2.0$  M at 80 °C (Table 1, entry 11).

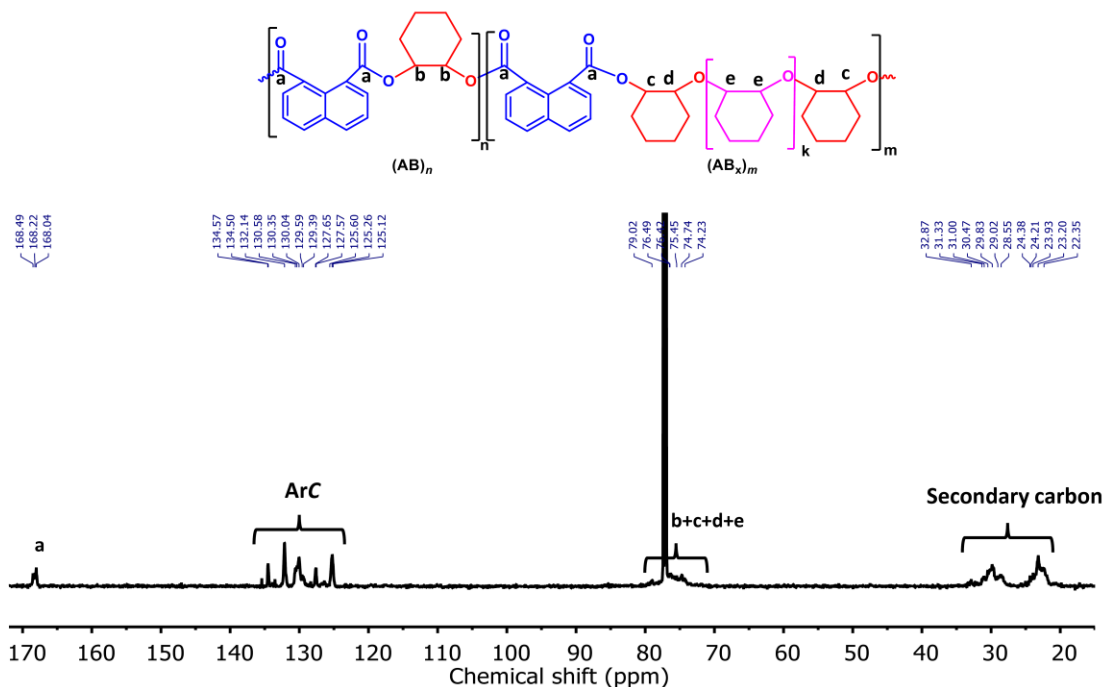

**Figure S19.**  $^{13}\text{C}$  NMR spectrum (150 MHz,  $\text{CDCl}_3$ , 30 °C) of copolymer from ROCOP of NA and CHO using NA: CHO:  $\text{SnOct}_2$  molar ratio of 50:300:1 and  $[\text{CHO}]_0 = 2.0$  M at 80 °C (Table 1, entry 11).

## NMR spectrum of TBA/CHO copolymers

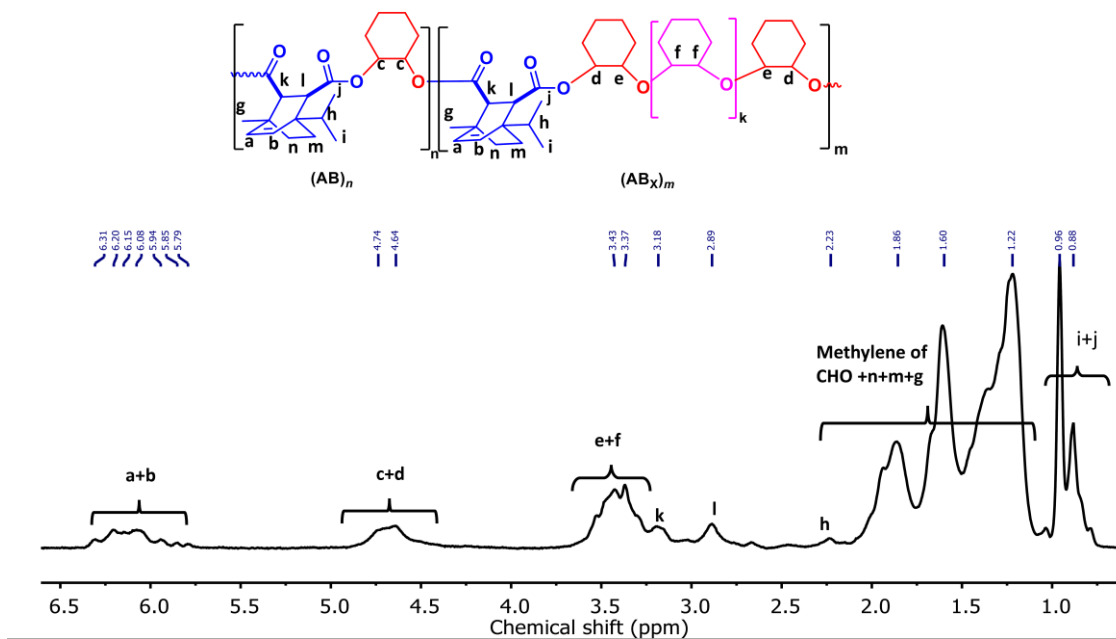

**Figure S20.**  $^1\text{H}$  NMR spectrum (600 MHz,  $\text{CDCl}_3$ , 30 °C) of copolymer from ROCOP of TBA and CHO using TBA: CHO:  $\text{SnOct}_2$  molar ratio of 50:300:1 and  $[\text{CHO}]_0 = 2.0$  M at 80 °C (Table 1, entry 14).

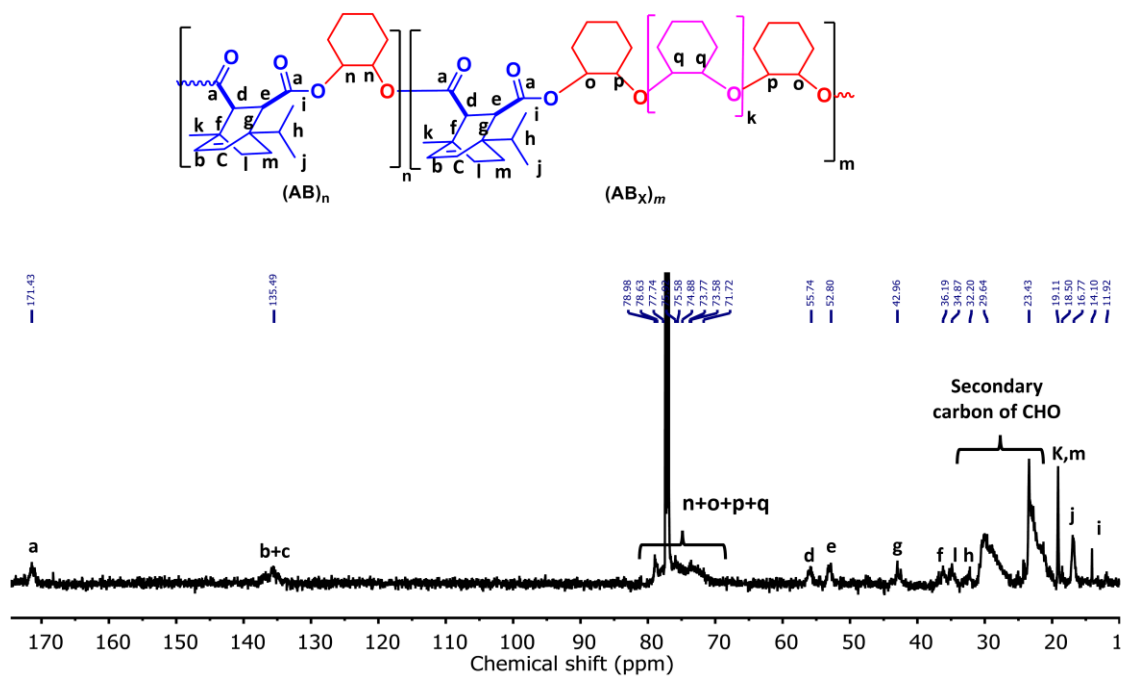

**Figure S21.**  $^{13}\text{C}$  NMR spectrum (150 MHz,  $\text{CDCl}_3$ , 30 °C) of copolymer from ROCOP of TBA and CHO using TBA: CHO:  $\text{SnOct}_2$  molar ratio of 50:300:1 and  $[\text{CHO}]_0 = 2.0$  M at 80 °C (Table 1, entry 14).

## NMR spectrum of MA/CHO copolymers

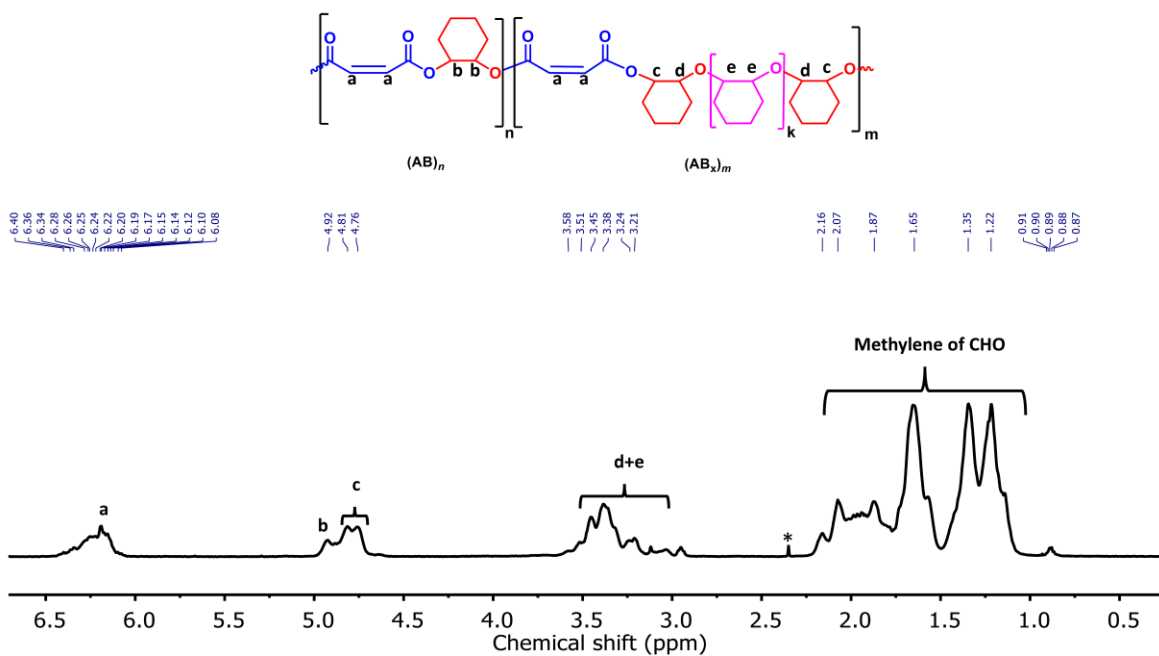

**Figure S22.**  $^1\text{H}$  NMR spectrum (600 MHz,  $\text{CDCl}_3$ , 30 °C; Asterisk indicates residual toluene) of copolymer from ROCOP of MA and CHO using MA: CHO:  $\text{SnOct}_2$  molar ratio of 50:300:1 and  $[\text{CHO}]_0 = 2.0$  M at 80 °C (Table 1, entry 12).

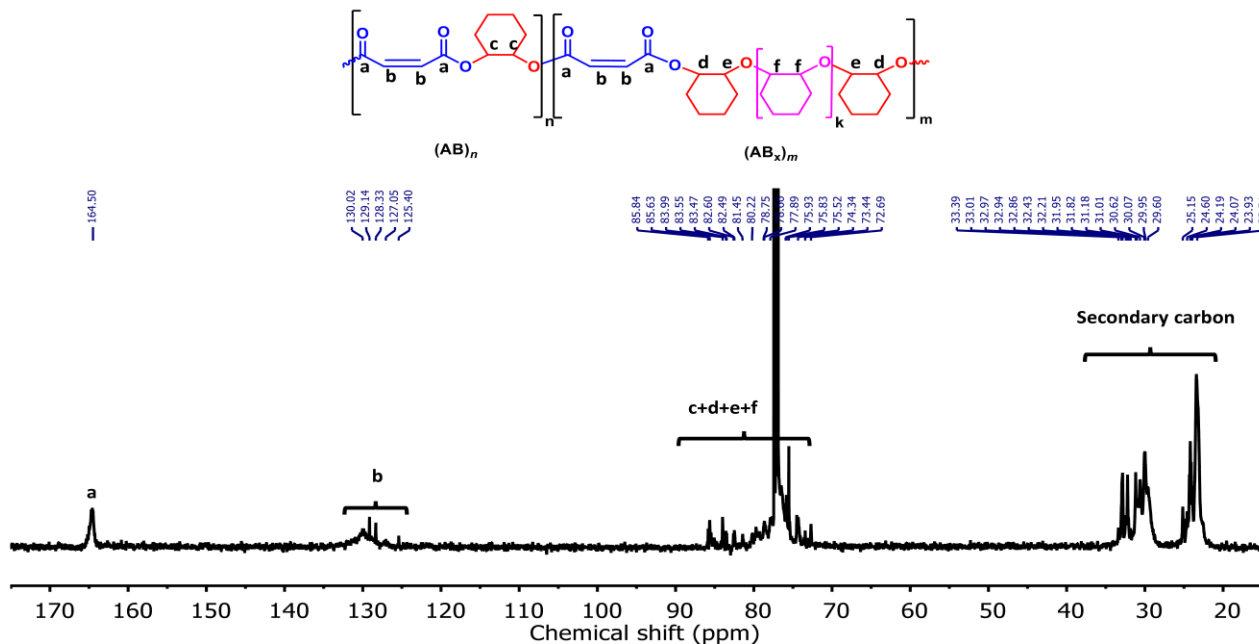

**Figure S23.**  $^{13}\text{C}$  NMR spectrum (150 MHz,  $\text{CDCl}_3$ , 30 °C) of copolymer from ROCOP of MA and CHO using MA: CHO:  $\text{SnOct}_2$  molar ratio of 50:300:1 and  $[\text{CHO}]_0 = 2.0$  M at 80 °C (Table 1, entry 12).

## NMR spectrum of DGA/CHO copolymers

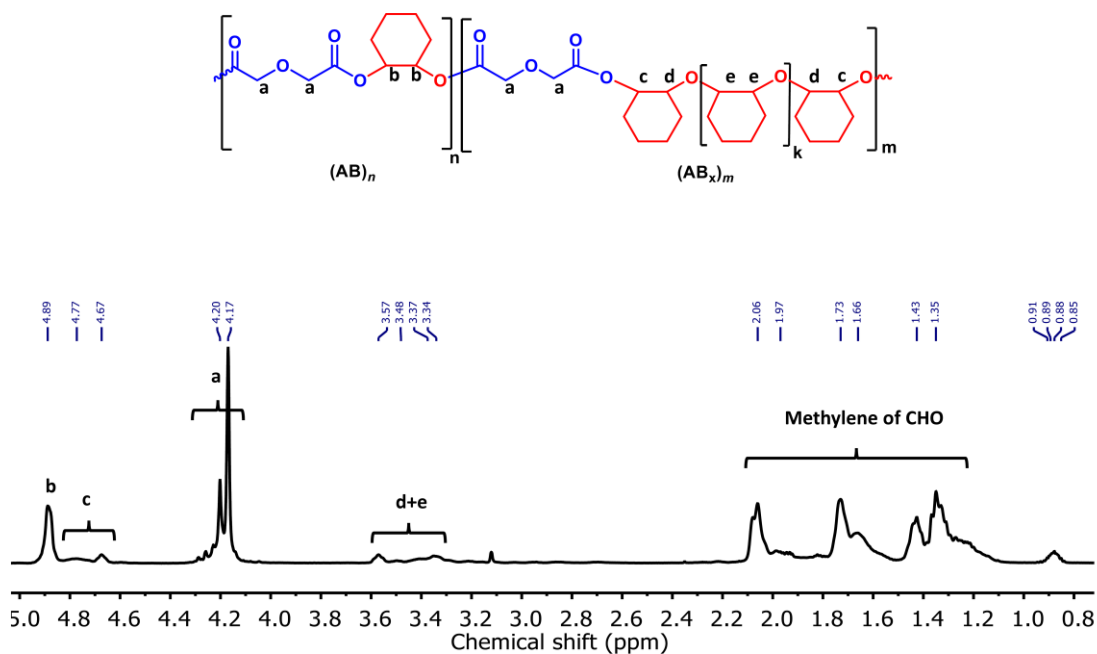

**Figure S24.**  $^1\text{H}$  NMR spectrum (600 MHz,  $\text{CDCl}_3$ , 30 °C) of copolymer from ROCOP of DGA and CHO using DGA: CHO:  $\text{SnOct}_2$  molar ratio of 50:300:1 and  $[\text{CHO}]_0 = 2.0$  M at 80 °C (Table 1, entry 13).

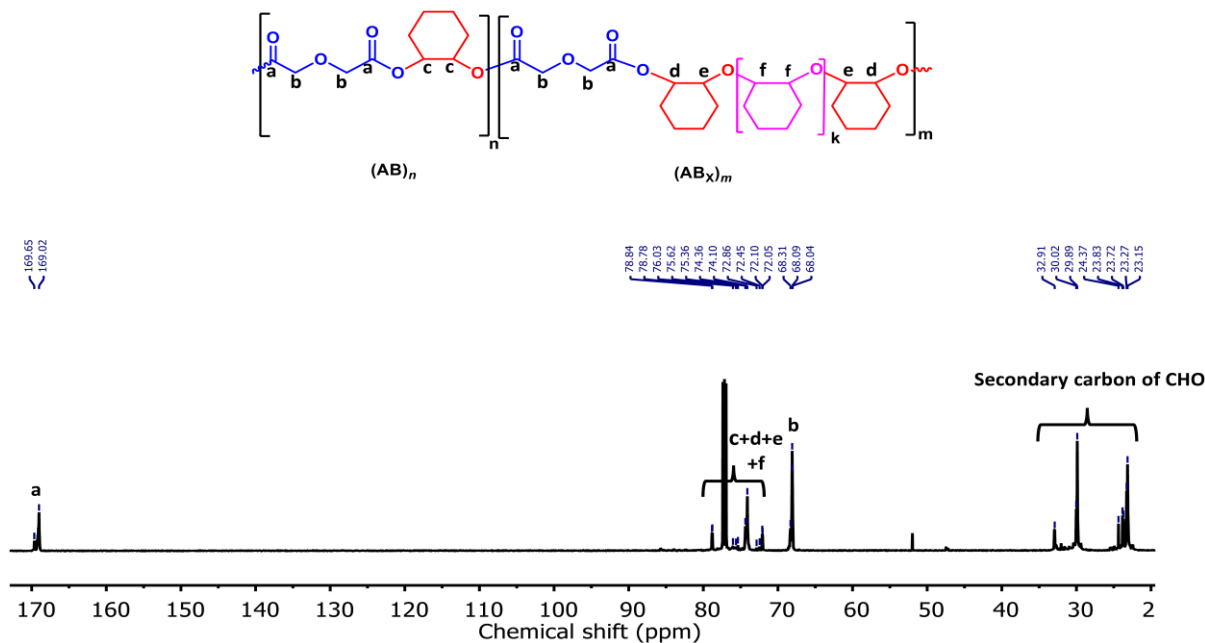

**Figure S25.**  $^{13}\text{C}$  NMR spectrum (150 MHz,  $\text{CDCl}_3$ , 30 °C) of copolymer from ROCOP of DGA and CHO using DGA: CHO:  $\text{SnOct}_2$  molar ratio of 50:300:1 and  $[\text{CHO}]_0 = 2.0$  M at 80 °C (Table 1, entry 13).

## NMR spectrum of PA/CPO copolymers

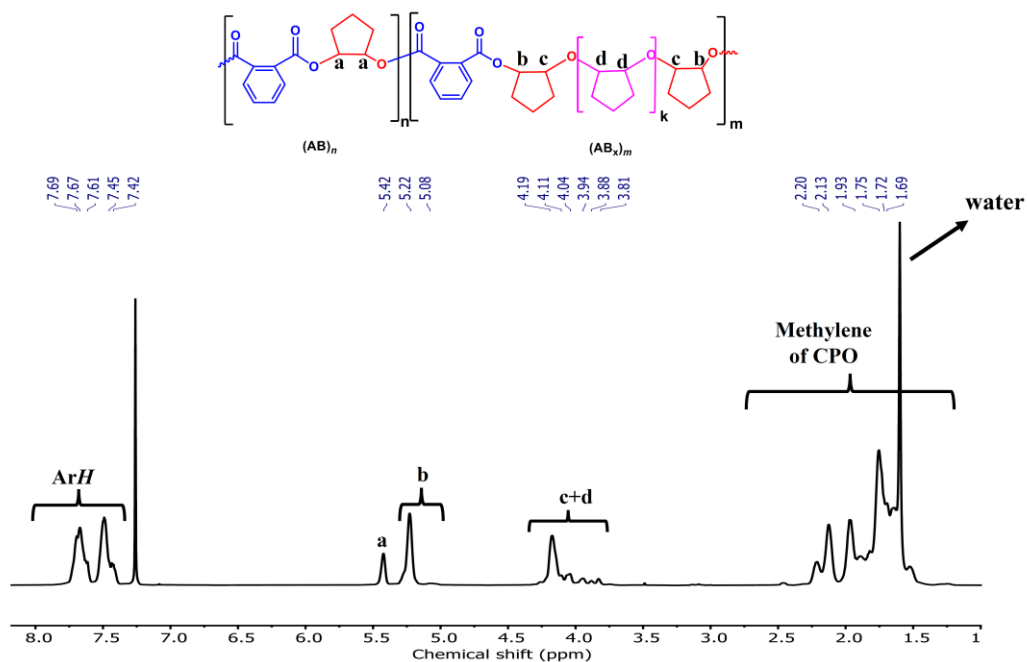

**Figure S26.**  $^1\text{H}$  NMR spectrum (600 MHz,  $\text{CDCl}_3$ , 30 °C) of copolymer from ROCOP of PA and CPO using PA: CPO:  $\text{SnOct}_2$  molar ratio of 50:300:1 and  $[\text{CPO}]_0 = 2.0$  M at 80 °C (Table 1, entry 16).

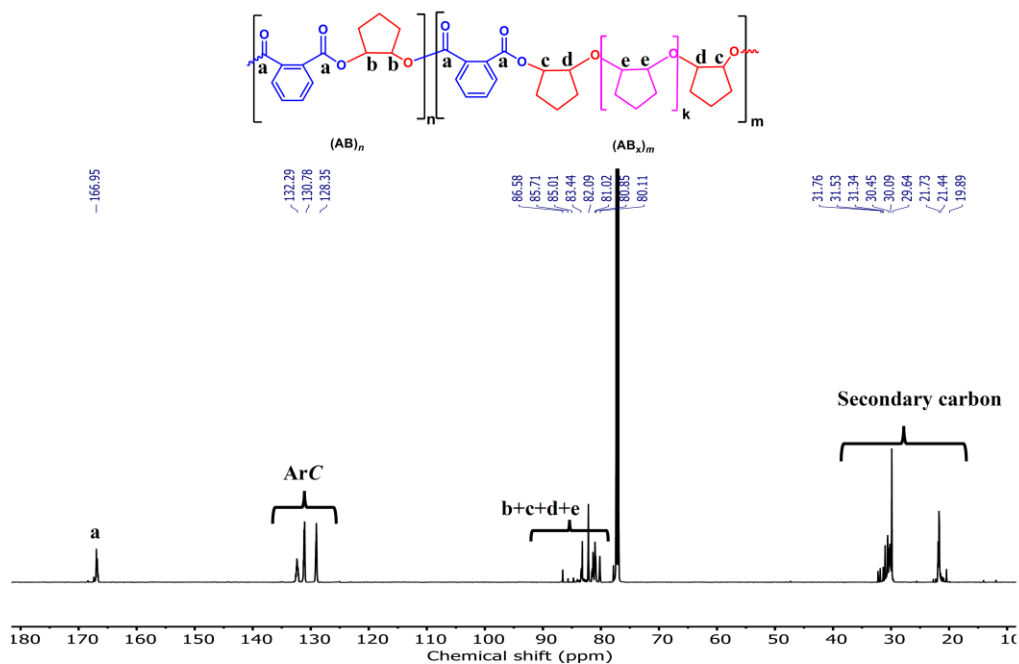

**Figure S27.**  $^{13}\text{C}$  NMR spectrum (600 MHz,  $\text{CDCl}_3$ , 30 °C) of copolymer from ROCOP of PA and CPO using PA: CPO:  $\text{SnOct}_2$  molar ratio of 50:300:1 and  $[\text{CPO}]_0 = 2.0$  M at 80 °C (Table 1, entry 16).

## NMR spectrum of PA/PO copolymers

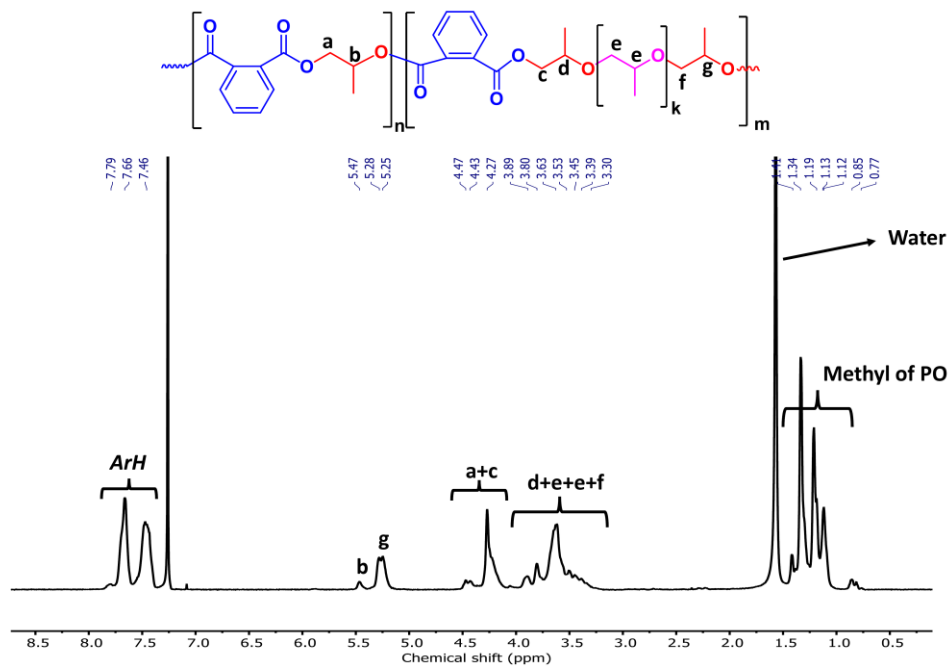

**Figure S28.**  $^1\text{H}$  NMR spectrum (600 MHz,  $\text{CDCl}_3$ , 30 °C) of copolymer from ROCOP of PA and PO using PA: PO:  $\text{SnOct}_2$  molar ratio of 50:300:1 and  $[\text{PO}]_0 = 2.0$  M at 80 °C (Table 1, entry 17).

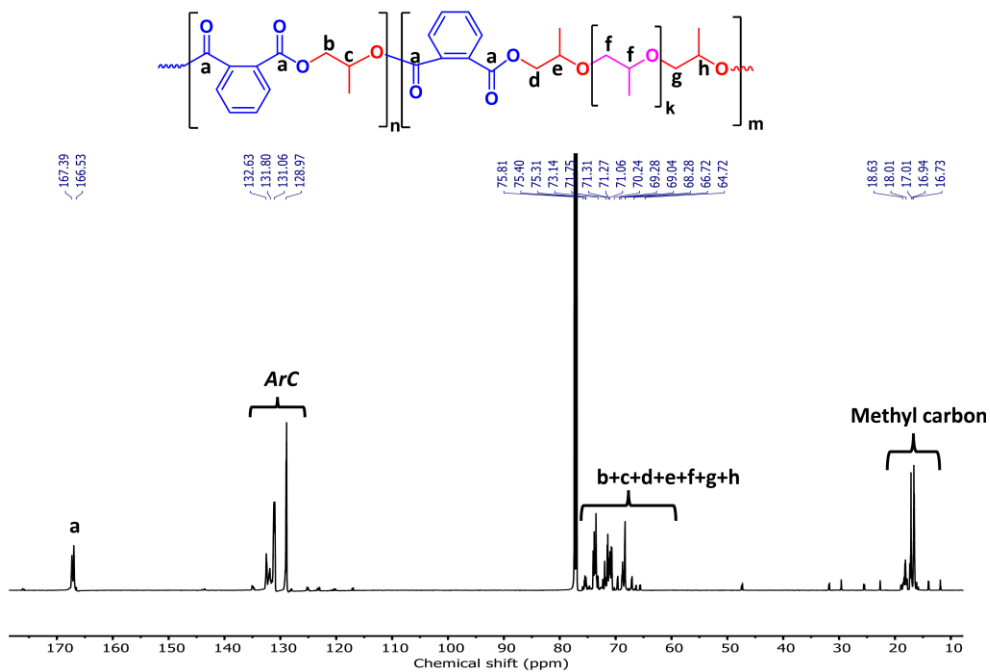

**Figure S29.**  $^{13}\text{C}$  NMR spectrum (600 MHz,  $\text{CDCl}_3$ , 30 °C) of copolymer from ROCOP of PA and PO using PA: PO:  $\text{SnOct}_2$  molar ratio of 50:300:1 and  $[\text{PO}]_0 = 2.0$  M at 80 °C (Table 1, entry 17).

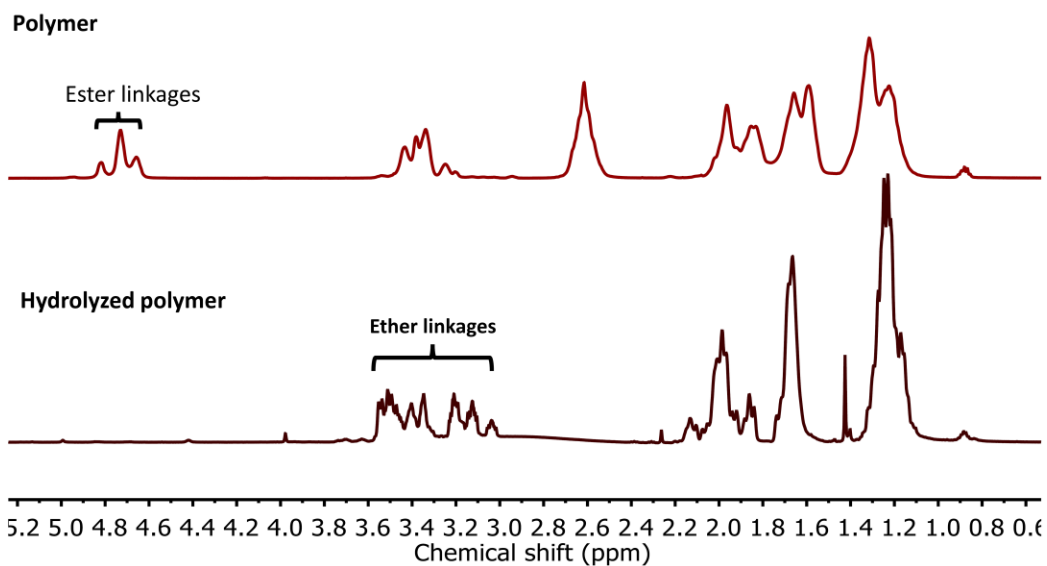

**Figure S30.**  $^1\text{H}$  NMR spectra (600 MHz,  $\text{CDCl}_3$ ,  $30\text{ }^\circ\text{C}$ ) of polymer (top) and hydrolyzed polymer (bottom) of poly(CHO-*co*-SA) (Table 1, entry 6).

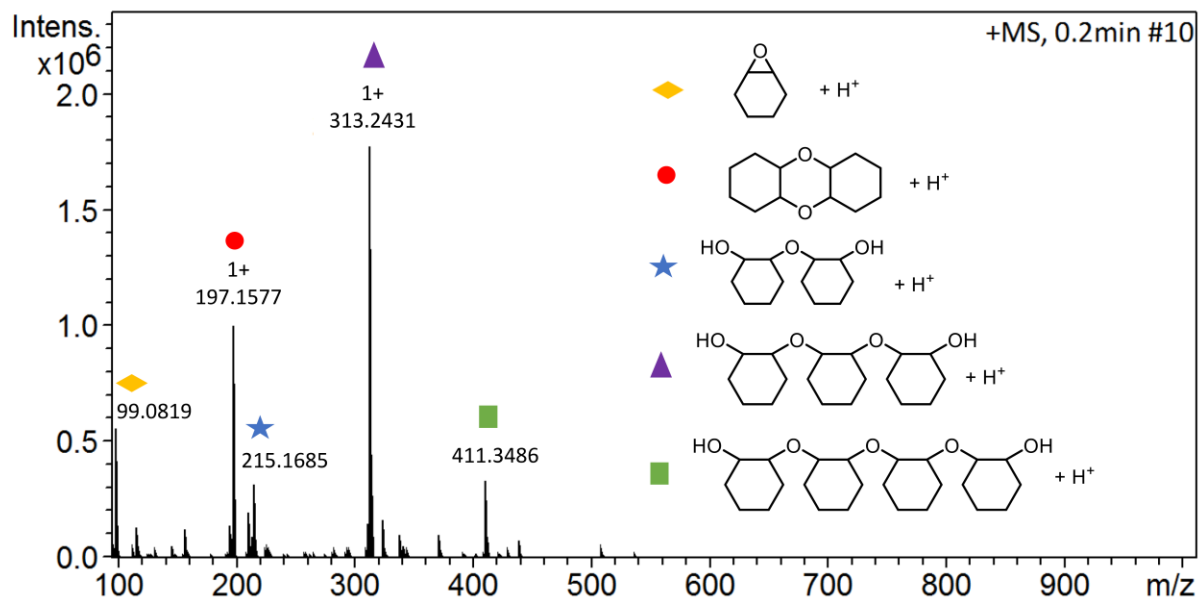

**Figure S31.** APCI mass spectrum of the hydrolyzed compositions of poly(CHO-*co*-SA) (from Table 1, entry 6) under basic condition at  $80\text{ }^\circ\text{C}$  for 3 days.

## DSC measurements

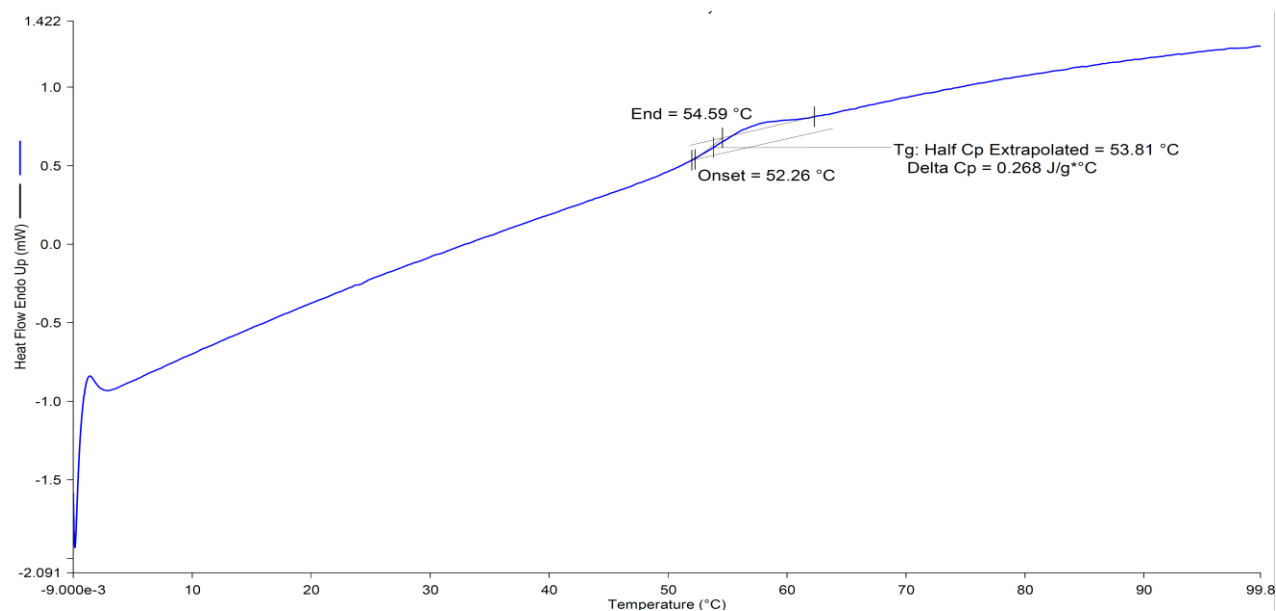

**Figure S32.** DSC data of polyester from copolymerization of CHO with SA (Table 1, entry 1).

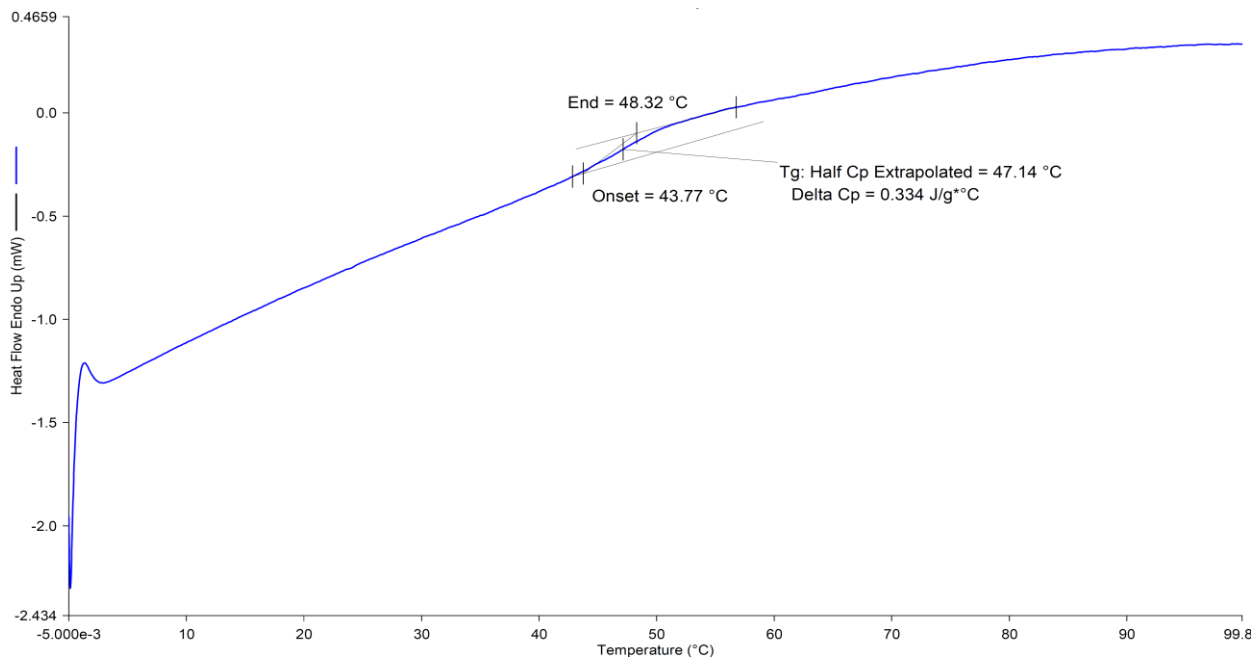

**Figure S33.** DSC data of polyester from copolymerization of CHO with SA (Table 1, entry 2).



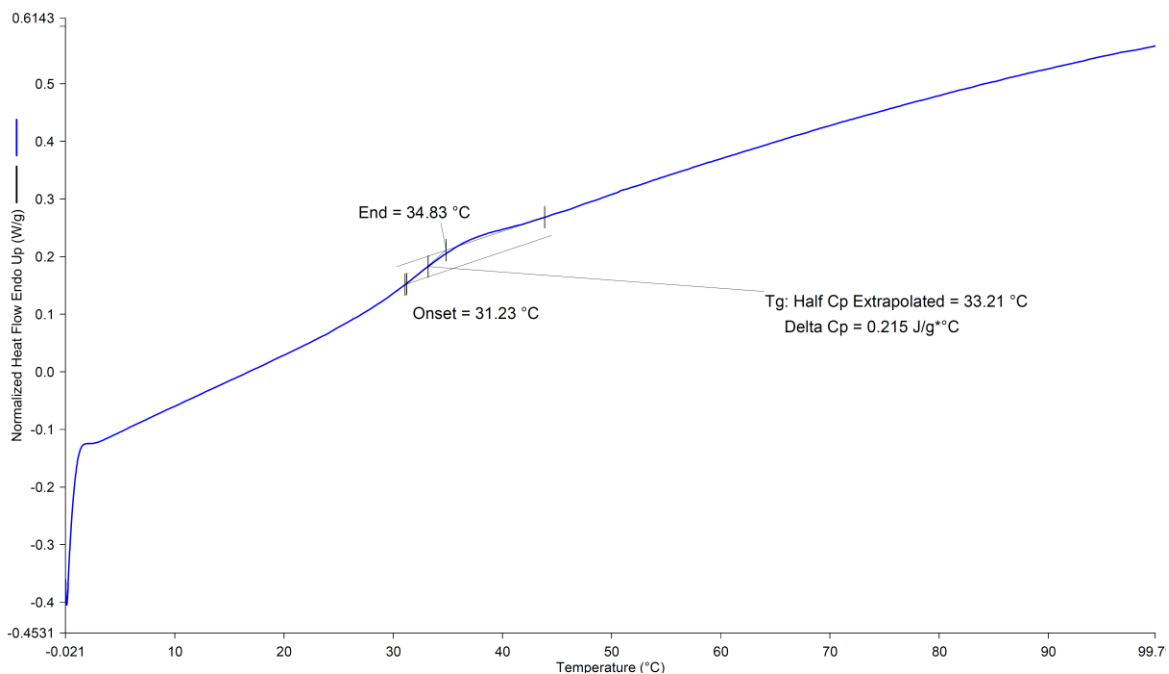

**Figure S34.** DSC data of polyester from copolymerization of CHO with SA (Table 1, entry 3).

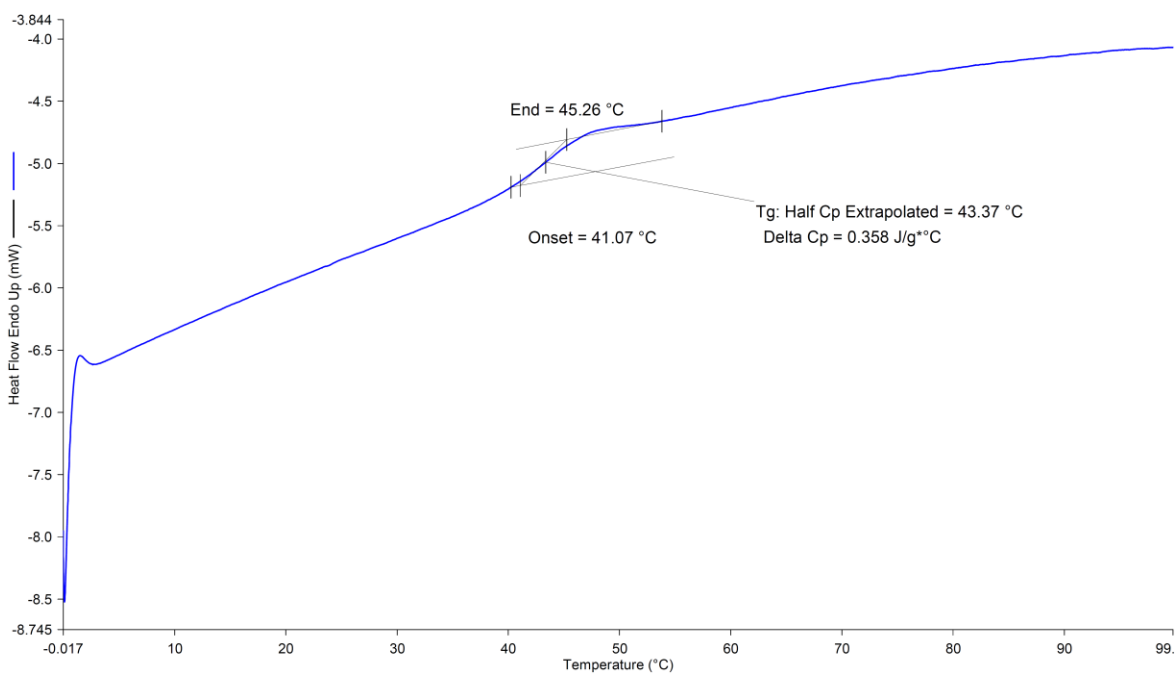

**Figure S35.** DSC data of polyester from copolymerization of CHO with SA (Table 1, entry 4).

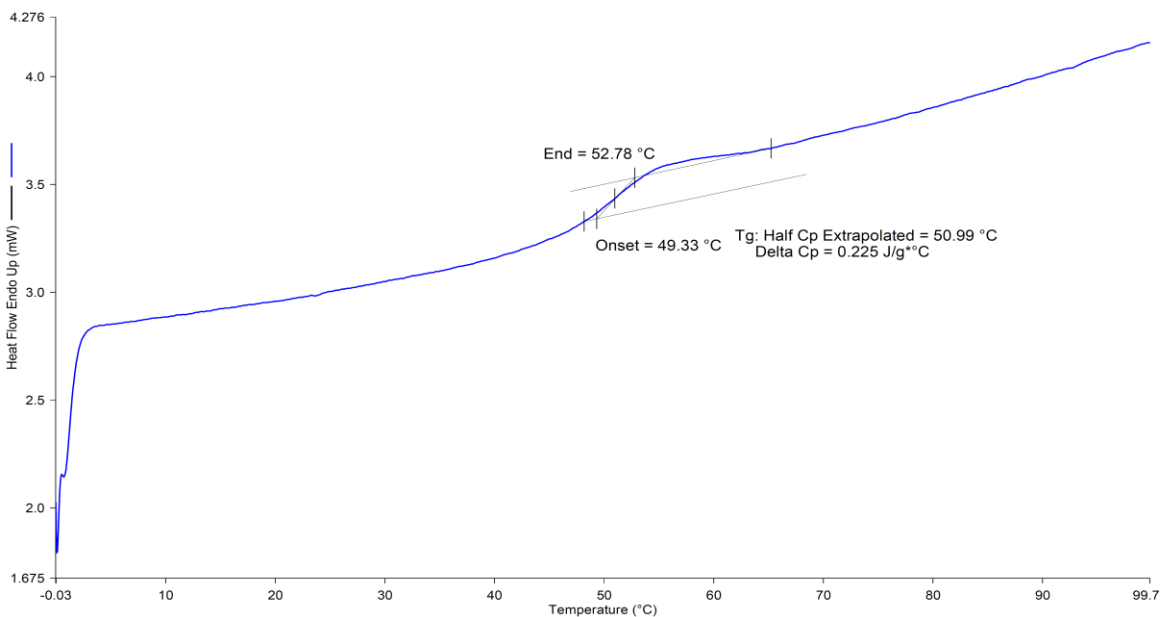

**Figure S36.** DSC data of polyester from copolymerization of CHO with SA (Table 1, entry 5).

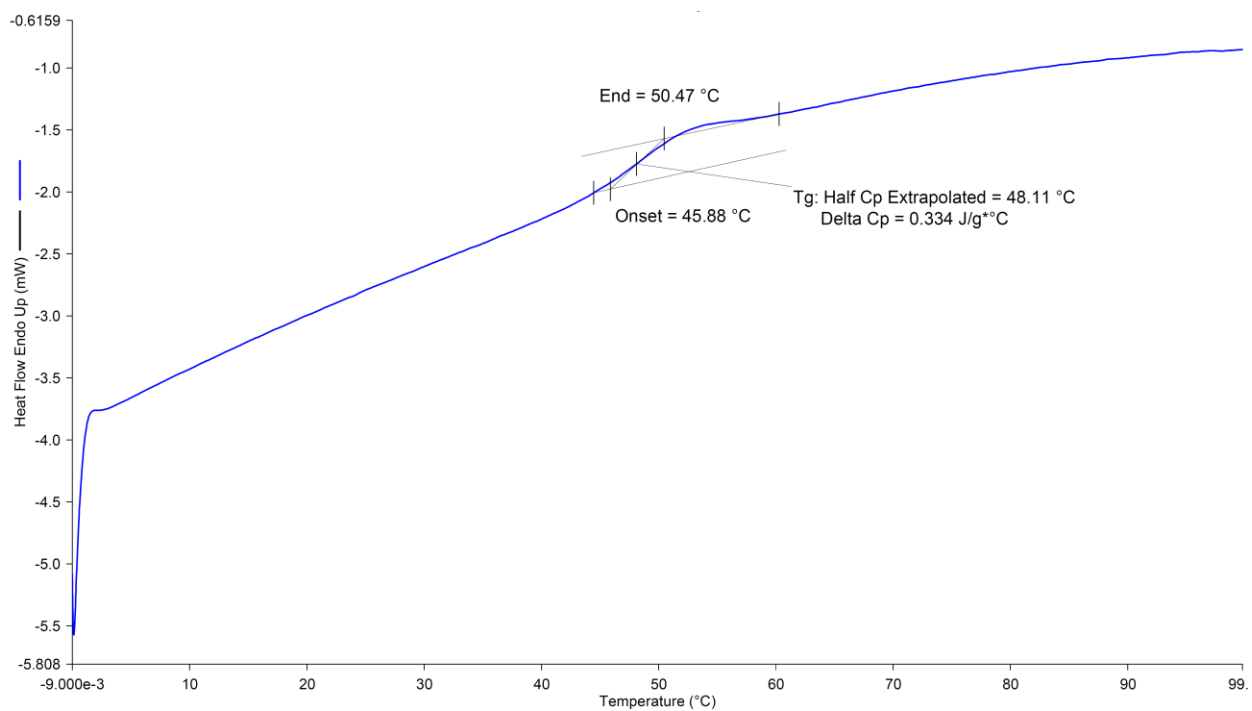

**Figure S37.** DSC data of polyester from copolymerization of CHO with SA (Table 1, entry 6).

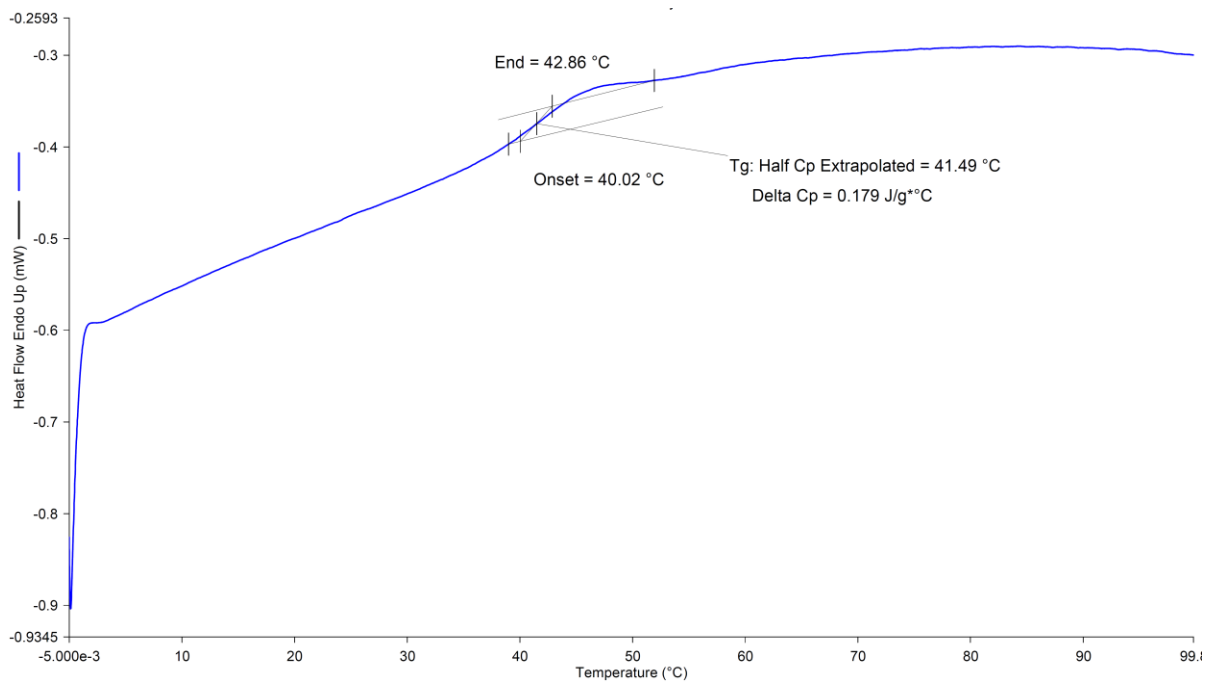

**Figure S38.** DSC data of polyester from copolymerization of CHO with SA (Table 1, entry 7).

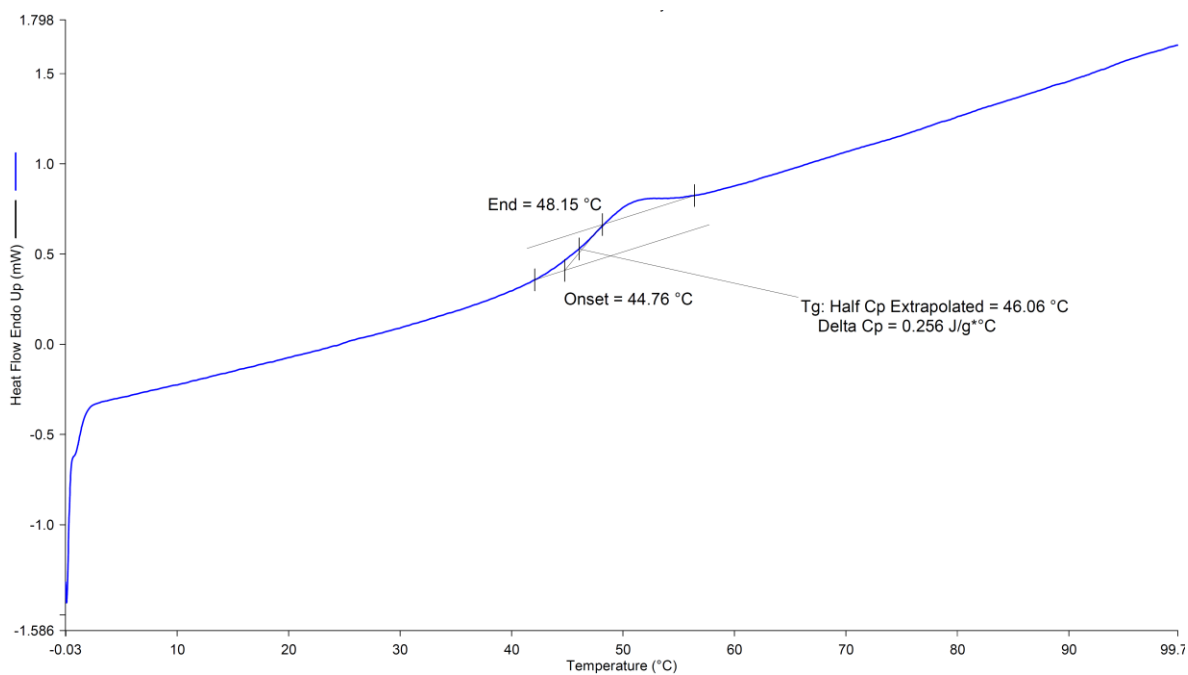

**Figure S39.** DSC data of polyester from copolymerization of CHO with SA (Table 1, entry 8).

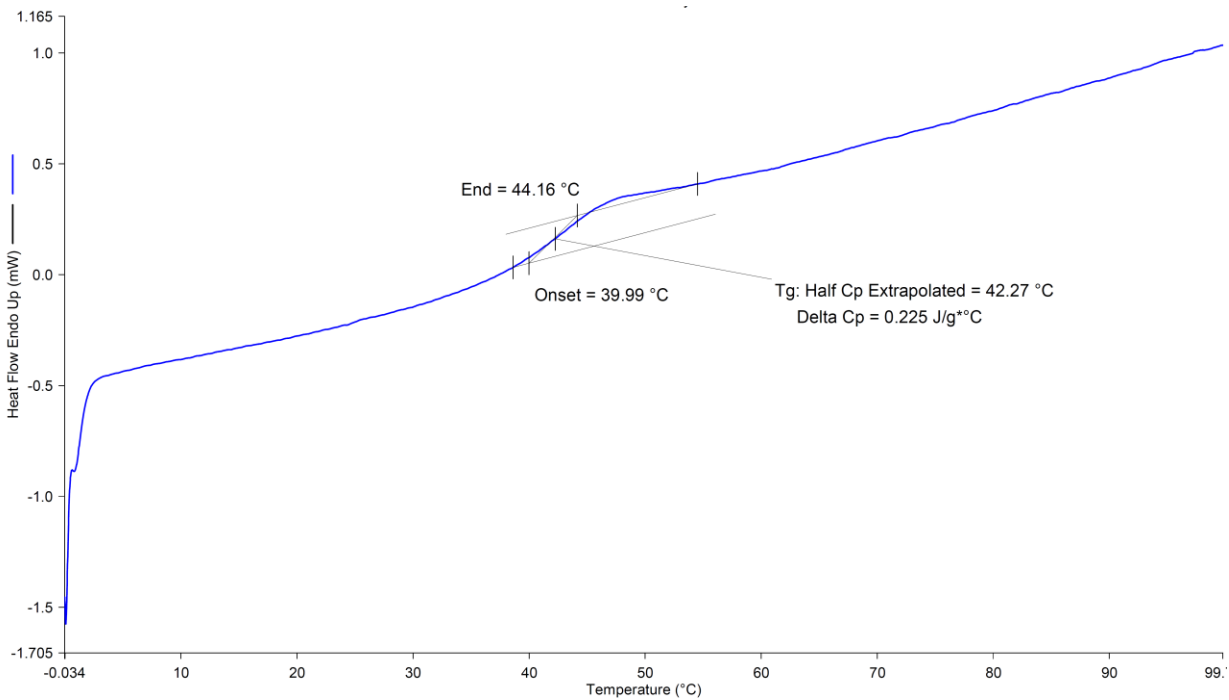

**Figure S40.** DSC data of polyester from copolymerization of CHO with SA (Table 1 entry 9).

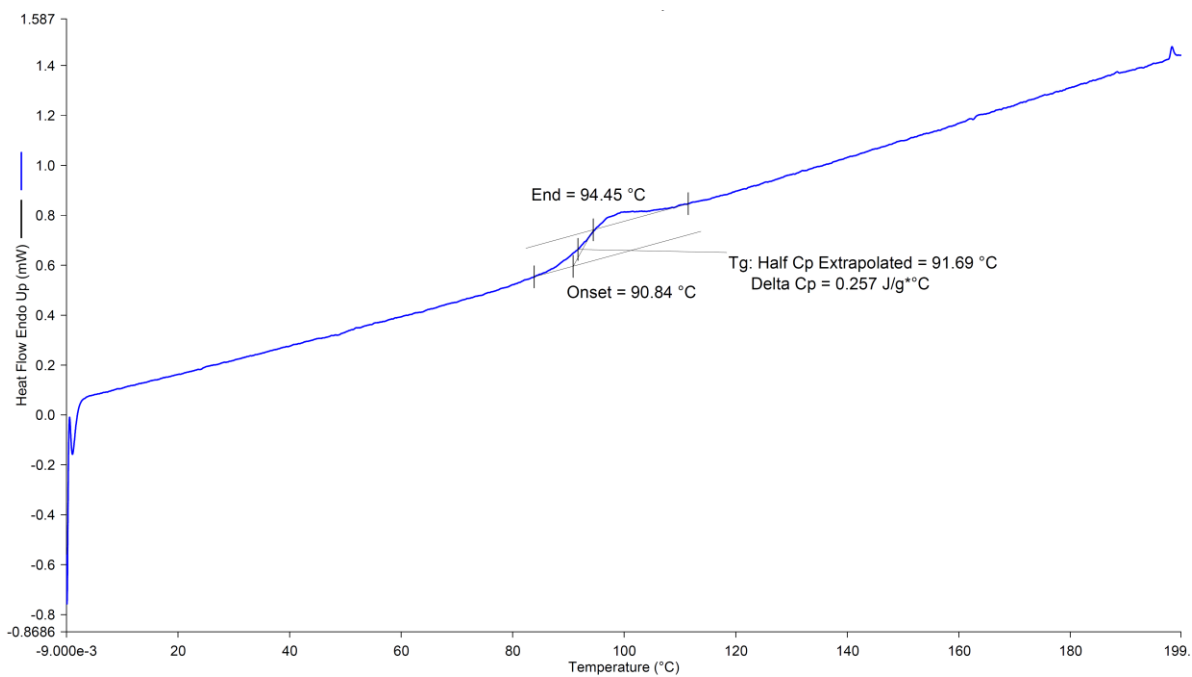

**Figure S41.** DSC data of polyester from copolymerization of CHO with PA (Table 1, entry 10).

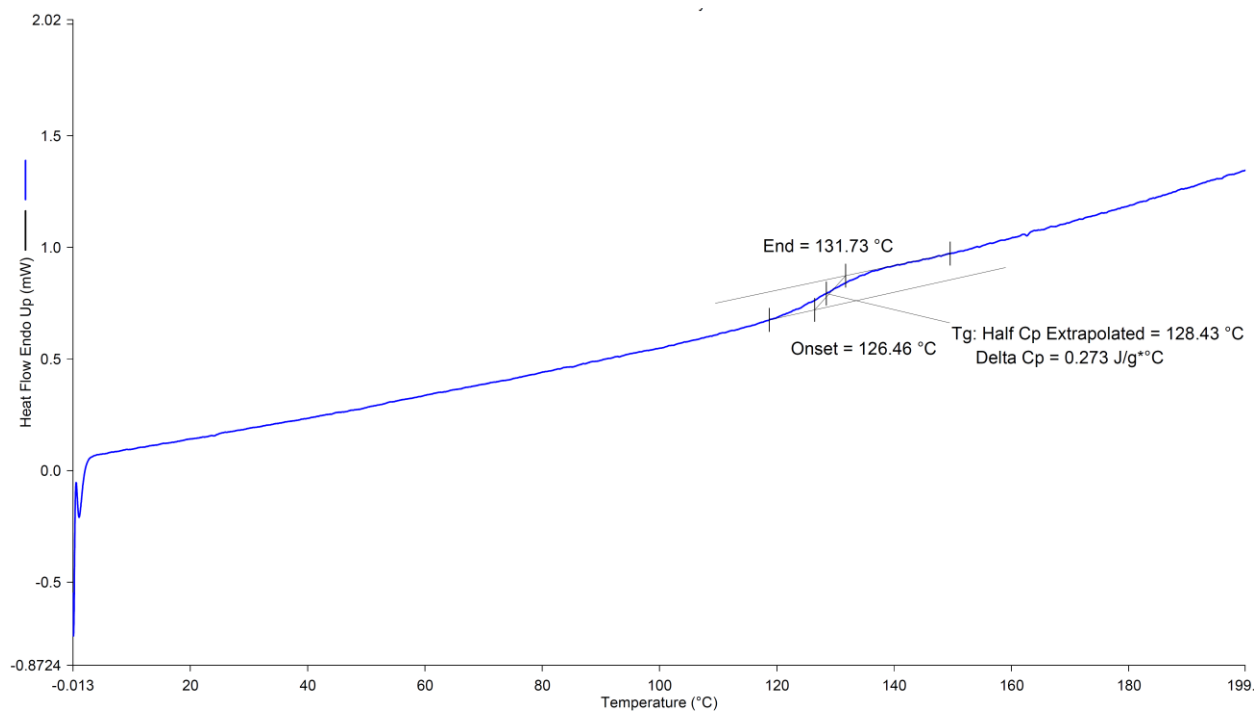

**Figure S42.** DSC data of polyester from copolymerization of CHO with NA (Table 1, entry 11).

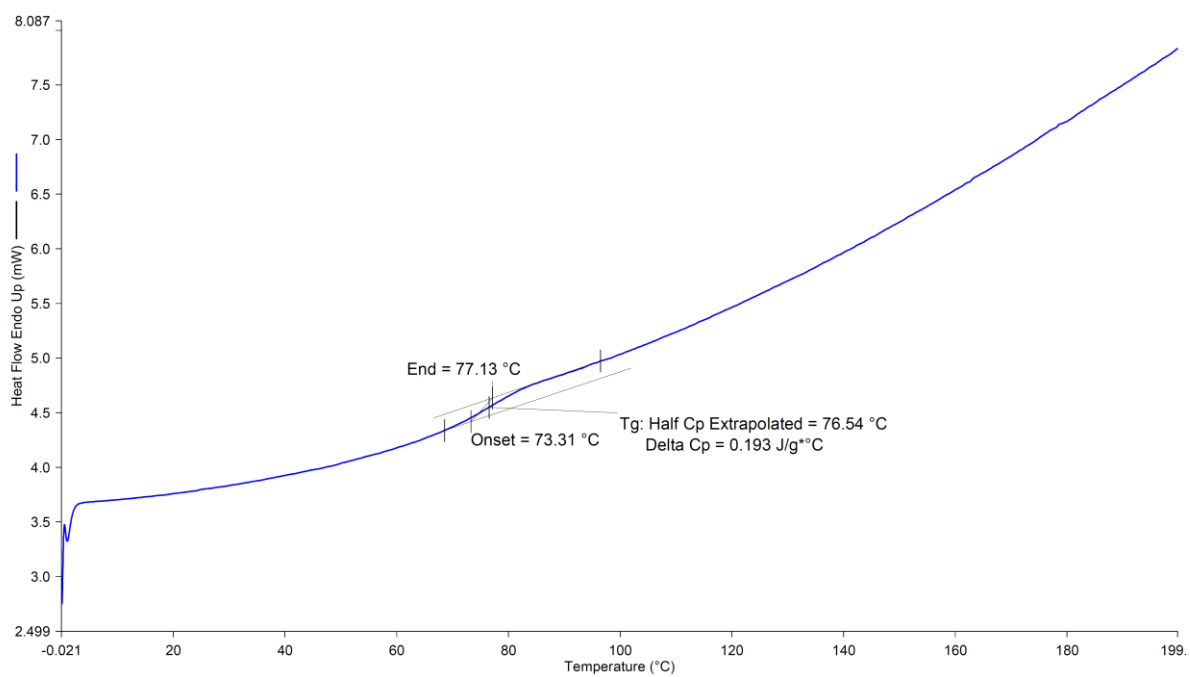

**Figure S43.** DSC data of polyester from copolymerization of CHO with TBA (Table 1, entry 14).

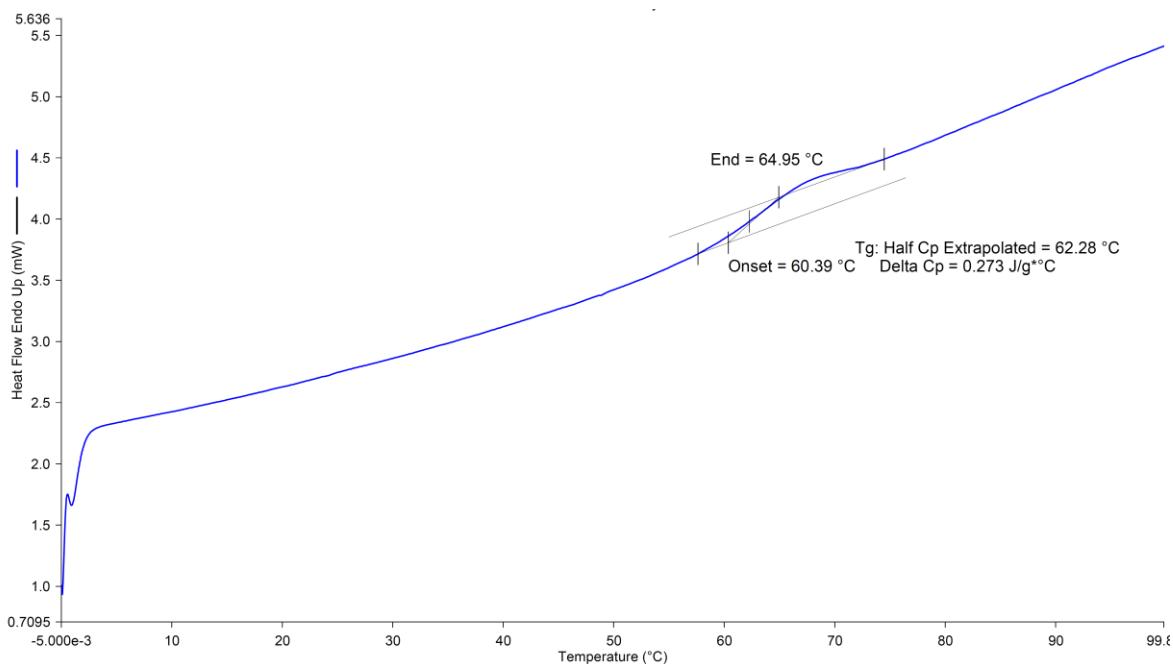

**Figure S44.** DSC data of polyester from copolymerization of CHO with MA (Table 1, entry 12).

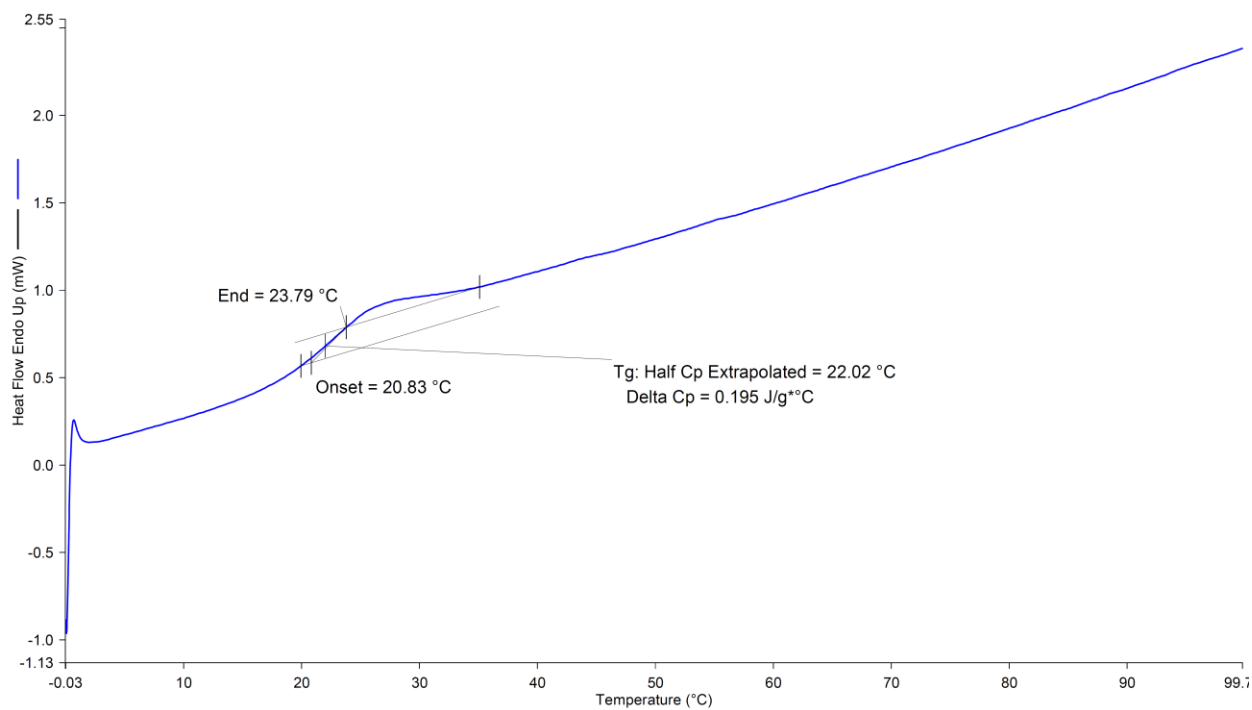

**Figure S45.** DSC data of polyester from copolymerization of CHO with DGA (Table 1, entry 13).

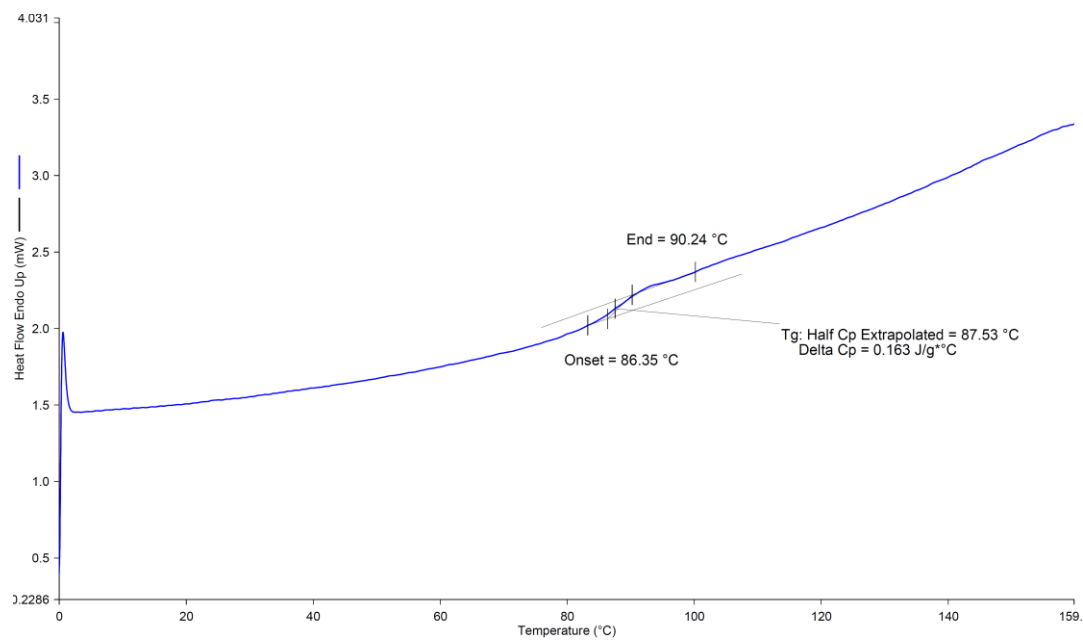

**Figure S46.** DSC data of polyester from copolymerization of CHO with PA (Table 1, entry 15).

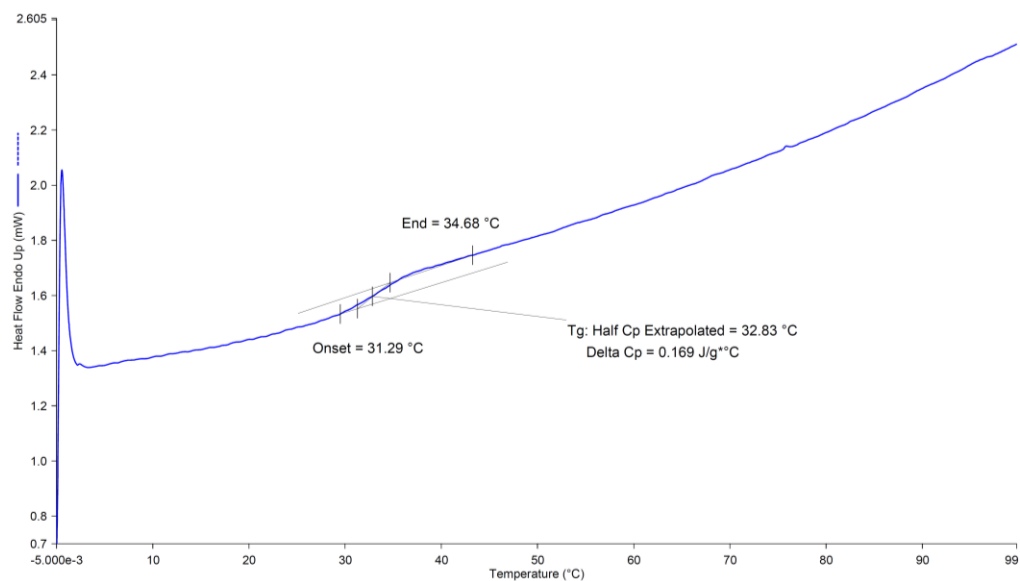

**Figure S47.** DSC data of polyester from copolymerization of CPO with PA (Table 1, entry 16).

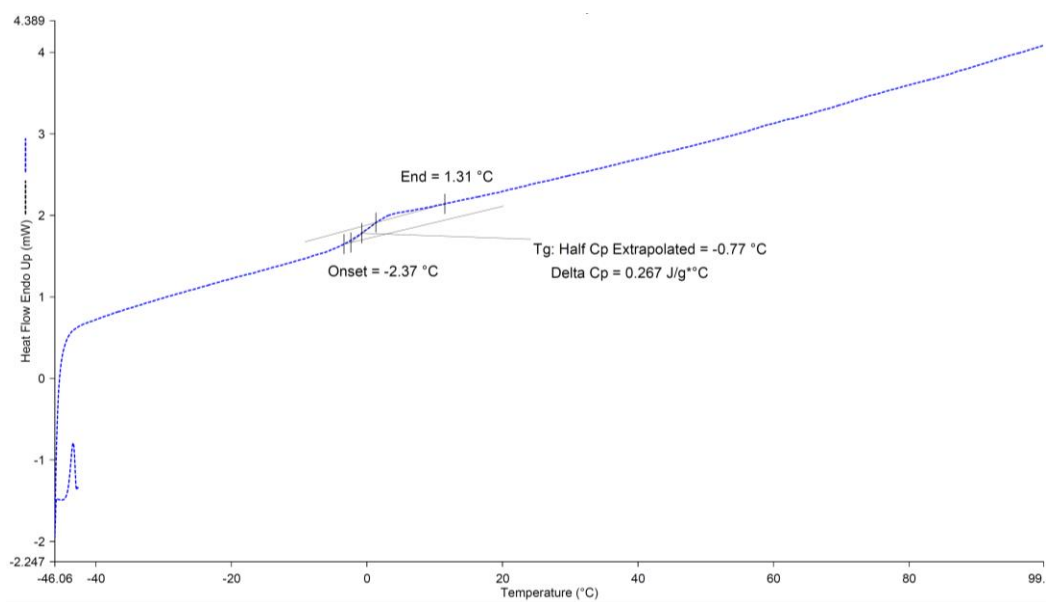

**Figure S48.** DSC data of polyester from copolymerization of PO with PA (Table 1, entry 17).



**Table S1.** A kinetic study of the ROCOP of CHO and SA using the condition in Table 1, entry 6.<sup>a</sup>

| Time (h) | Average DP of CHO <sup>b</sup> | Average DP of SA <sup>b</sup> | Consumption ratio of CHO and SA <sup>c</sup> |
|----------|--------------------------------|-------------------------------|----------------------------------------------|
| 1        | 24.8                           | 9.4                           | 2.64                                         |
| 2        | 64.6                           | 23.8                          | 2.72                                         |
| 3        | 91.1                           | 32.7                          | 2.78                                         |
| 4        | 106.0                          | 38.0                          | 2.79                                         |
| 5        | 115.7                          | 41.1                          | 2.81                                         |
| 6        | 120.0                          | 43.1                          | 2.78                                         |
| 7        | 125.0                          | 44.6                          | 2.80                                         |

<sup>a</sup> ([anh]<sub>0</sub>/[CHO]<sub>0</sub>/[SnOct<sub>2</sub>]<sub>0</sub>) = 50/300/1; [CHO] = 2.0 M in toluene at 80 ° C. <sup>b</sup> Determined by <sup>1</sup>H NMR spectroscopy. <sup>c</sup> Calculated by DP of CHO/ DP of SA.

**Table S2.** Polymer molecular weight and dispersity for ROCOP using the condition in Table 1, entry 6.<sup>a</sup>

| Time (h) | Conv. of SA (%) <sup>b</sup> | M <sub>n, GPC</sub> (Da) <sup>c</sup> | M <sub>n, NMR</sub> (Da) <sup>b</sup> | Đ <sup>c</sup> |
|----------|------------------------------|---------------------------------------|---------------------------------------|----------------|
| 1        | 17.0                         | 1036                                  | 1340                                  | 1.58           |
| 2        | 48.2                         | 1855                                  | 2844                                  | 1.48           |
| 3        | 68.1                         | 2159                                  | 3912                                  | 1.52           |
| 4        | 77.5                         | 2366                                  | 4290                                  | 1.52           |
| 5        | 85.8                         | 2410                                  | 4524                                  | 1.53           |

<sup>a</sup> ([anh]<sub>0</sub>/[CHO]<sub>0</sub>/[SnOct<sub>2</sub>]<sub>0</sub>) = 50/300/1; [CHO] = 2.0 M in toluene at 80 ° C. <sup>b</sup> Determined by <sup>1</sup>H NMR spectroscopy. <sup>c</sup> Obtained from GPC analysis using refractive index (RI) detector.

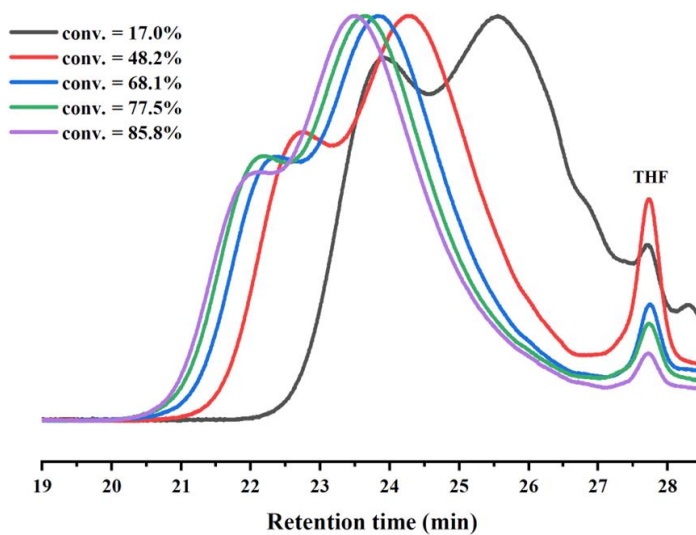**Figure S49** GPC traces of polymers at different conversions of SA reported in Table S2.

## Kinetic analysis

- Rate dependence on cyclic anhydride

**Table S3.** Kinetic studies for determination of dependence on SA concentration.

| Entry | [CHO] (M) | [SA] (M) | [Catalyst] (M) | Initial rates (mM s <sup>-1</sup> ) |
|-------|-----------|----------|----------------|-------------------------------------|
| 1     | 2.0       | 0.165    | 0.0067         | 0.00904                             |
| 2     | 2.0       | 0.22     | 0.0067         | 0.01028                             |
| 3     | 2.0       | 0.275    | 0.0067         | 0.01378                             |
| 4     | 2.0       | 0.33     | 0.0067         | 0.01566                             |

- Rate dependence on epoxide

**Table S4.** Kinetic studies for determination of dependence on CHO concentration.

| Entry | [CHO] (M) | [SA] (M) | [Catalyst] (M) | Initial rates (mM s <sup>-1</sup> ) | ln(Initial rates) (mM s <sup>-1</sup> ) | ln([CHO] (M)) |
|-------|-----------|----------|----------------|-------------------------------------|-----------------------------------------|---------------|
| 1     | 1.33      | 0.33     | 0.0067         | 0.00774                             | -4.8614                                 | 0.285179      |
| 2     | 1.67      | 0.33     | 0.0067         | 0.01180                             | -4.4394                                 | 0.512824      |
| 3     | 2.00      | 0.33     | 0.0067         | 0.01566                             | -4.1569                                 | 0.693147      |
| 4     | 2.33      | 0.33     | 0.0067         | 0.02352                             | -3.7500                                 | 0.845868      |

- Rate dependence on catalyst

**Table S5.** Kinetic studies for determination of dependence on SnOct<sub>2</sub> concentration

| Entry | [CHO] (M) | [SA] (M) | [Catalyst] M | Initial rates (mM s <sup>-1</sup> ) |
|-------|-----------|----------|--------------|-------------------------------------|
| 1     | 2.0       | 0.33     | 0.0033       | 0.00583                             |
| 2     | 2.0       | 0.33     | 0.0067       | 0.01566                             |
| 3     | 2.0       | 0.33     | 0.01         | 0.04531                             |
| 4     | 2.0       | 0.33     | 0.0134       | 0.06714                             |

**Note:** The aliquots of crude product were monitored by <sup>1</sup>H NMR spectroscopy to calculate a conversion. The initial rates were determined when conversions of SA were less than 20%.

## 2.2 Sequential terpolymerization with *L*-LA

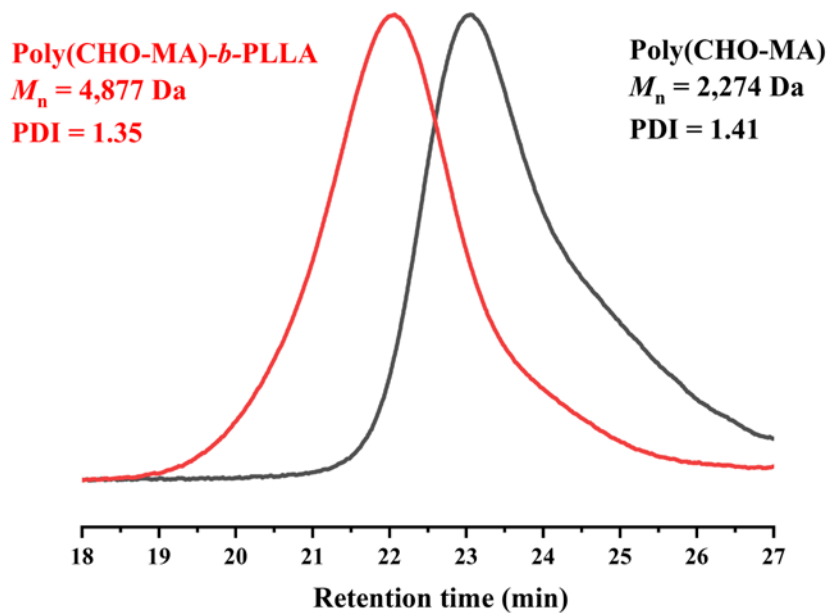

**Figure 50.** GPC traces (flow rate of  $1.0 \text{ mL min}^{-1}$  at  $35 \text{ }^\circ\text{C}$  in THF) of poly(CHO-MA) and poly(CHO-MA)-*b*-PLLA from copolymerization of MA, CHO, and *L*-LA using refractometric (RI) detector.

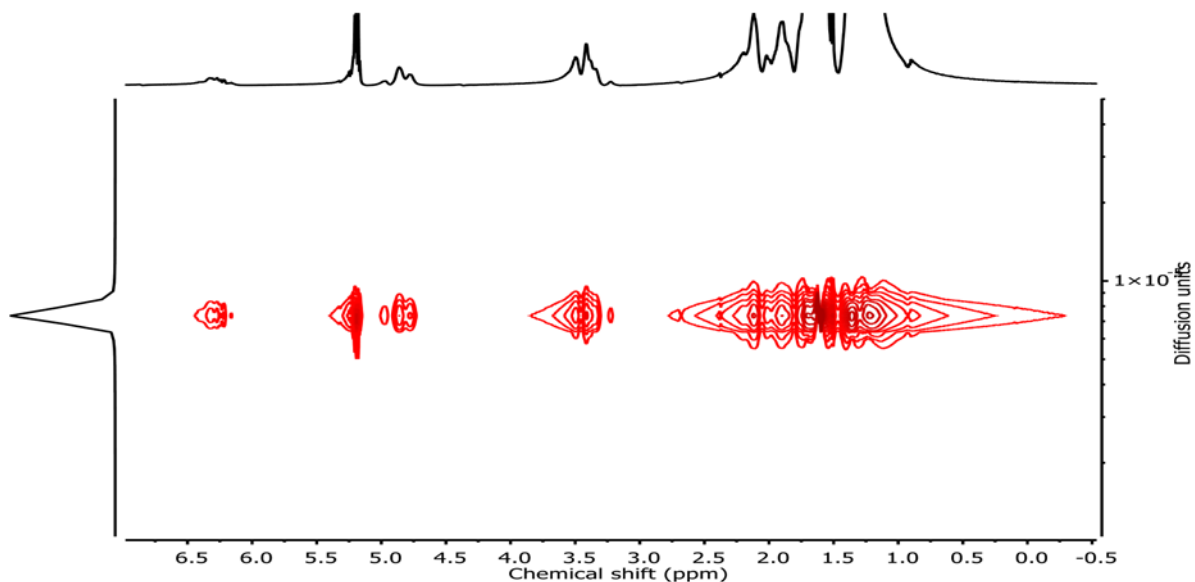

**Figure 51.** DOSY NMR spectrum (600 MHz,  $\text{CDCl}_3$ ,  $30 \text{ }^\circ\text{C}$ ) of sequential terpolymerization of MA, CHO and *L*-LA using a SA/CHO/*L*-LA/SnOct<sub>2</sub> molar ratio of 50:300:50:1 and  $[\text{CHO}]_0 = 2.0 \text{ M}$  at  $80 \text{ }^\circ\text{C}$ .

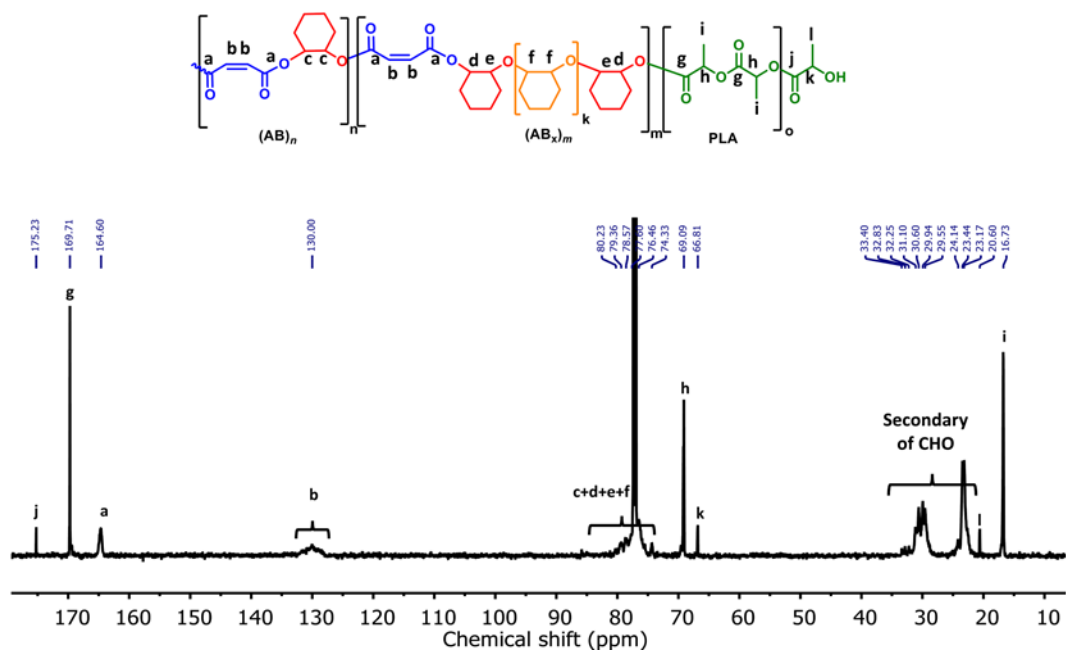

**Figure S52.**  $^{13}\text{C}$  NMR spectrum (150 MHz,  $\text{CDCl}_3$ , 30 °C) of the terpolymer from ROCOP of MA and CHO followed by sequential addition of *L*-LA.

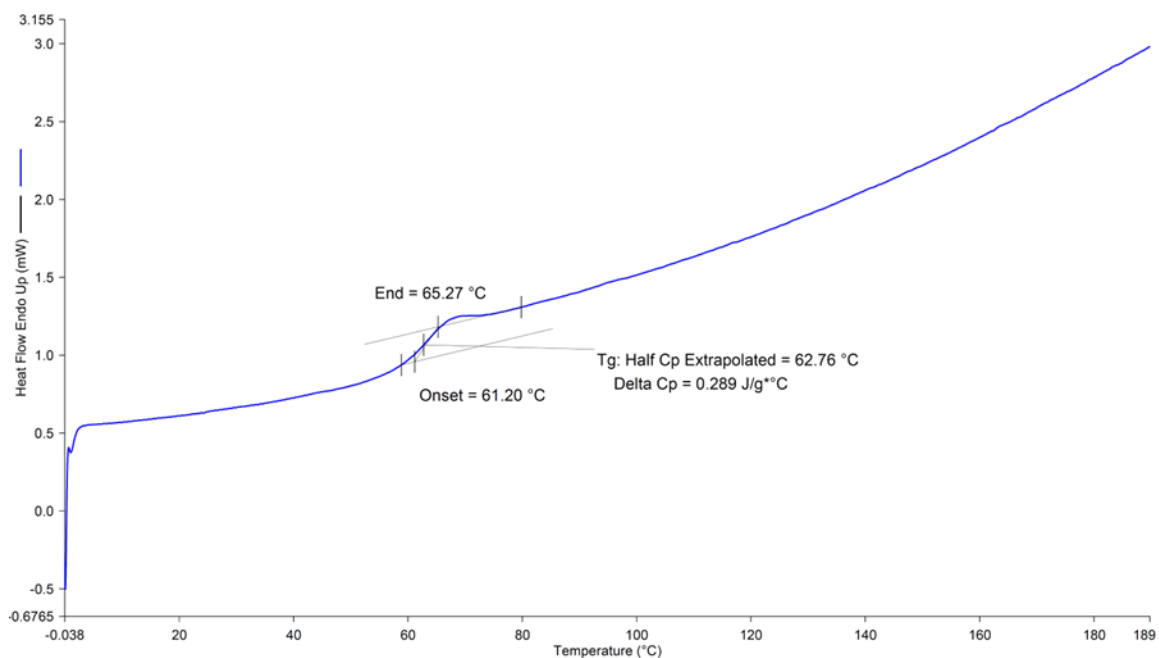

**Figure S53.** DSC data of the terpolymer from ROCOP of MA and CHO followed by sequential addition of *L*-LA.

## 2.3 The synthesis of poly(ester-ether)-based polyurethane

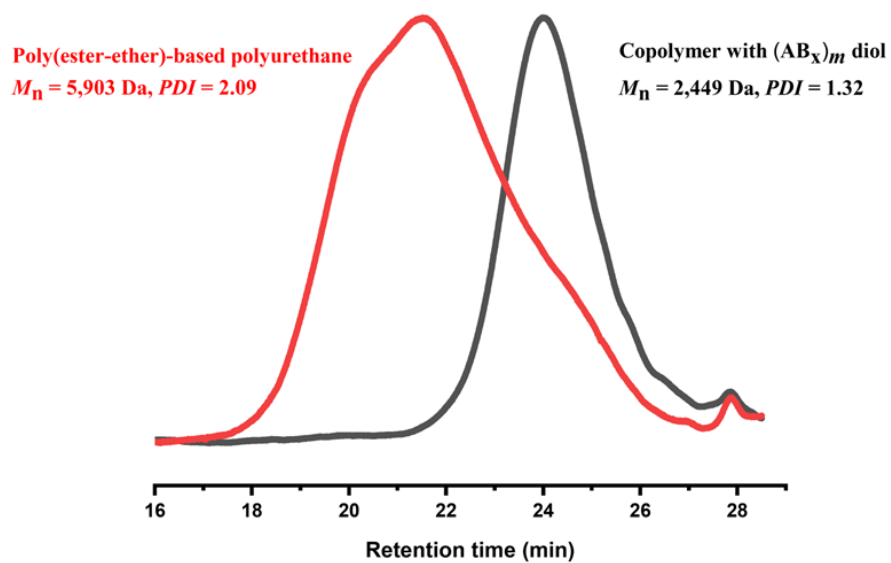

**Figure S54.** GPC traces (flow rate of  $1.0 \text{ mL min}^{-1}$  at  $35 \text{ }^\circ\text{C}$  in THF) of copolymer with  $(AB_x)_m$  diol and poly(ester-ether)-based polyurethane using refractometric (RI) detector.

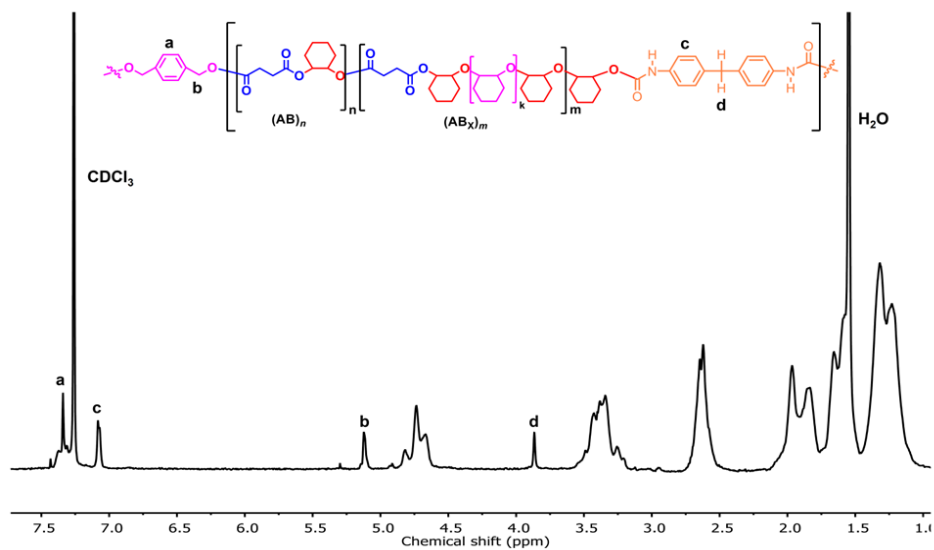

**Figure S55.**  $^1\text{H}$  NMR spectrum (600 MHz,  $\text{CDCl}_3$ , 30  $^\circ\text{C}$ ) of the resulting poly(ester-ether)-based polyurethane

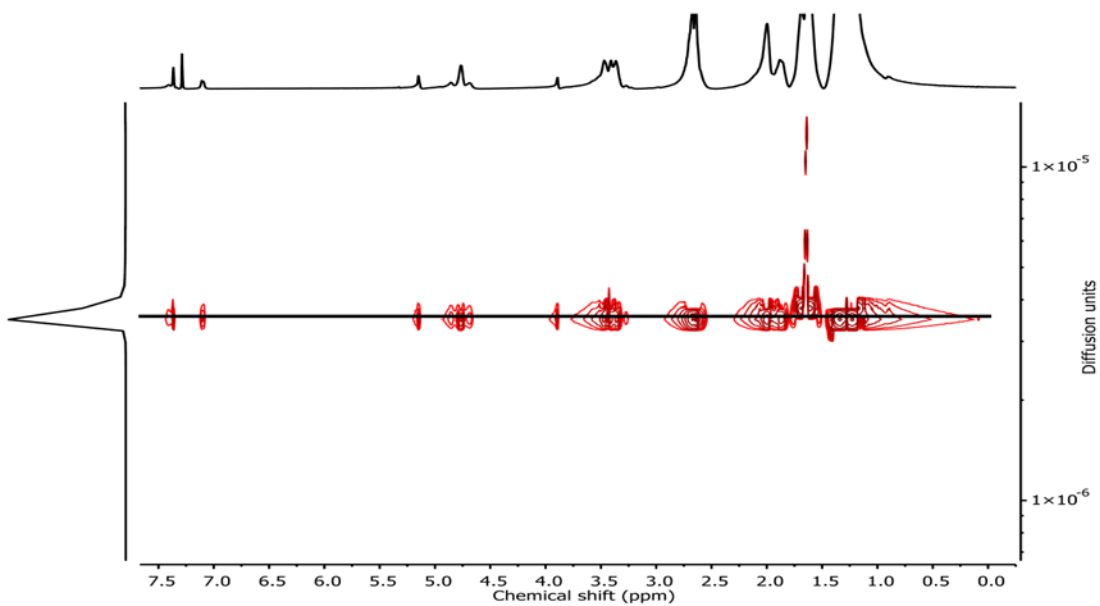

**Figure S56.** DOSY NMR spectrum (600 MHz,  $\text{CDCl}_3$ , 30  $^\circ\text{C}$ ) of the resulting poly(ester-ether)-based polyurethane.

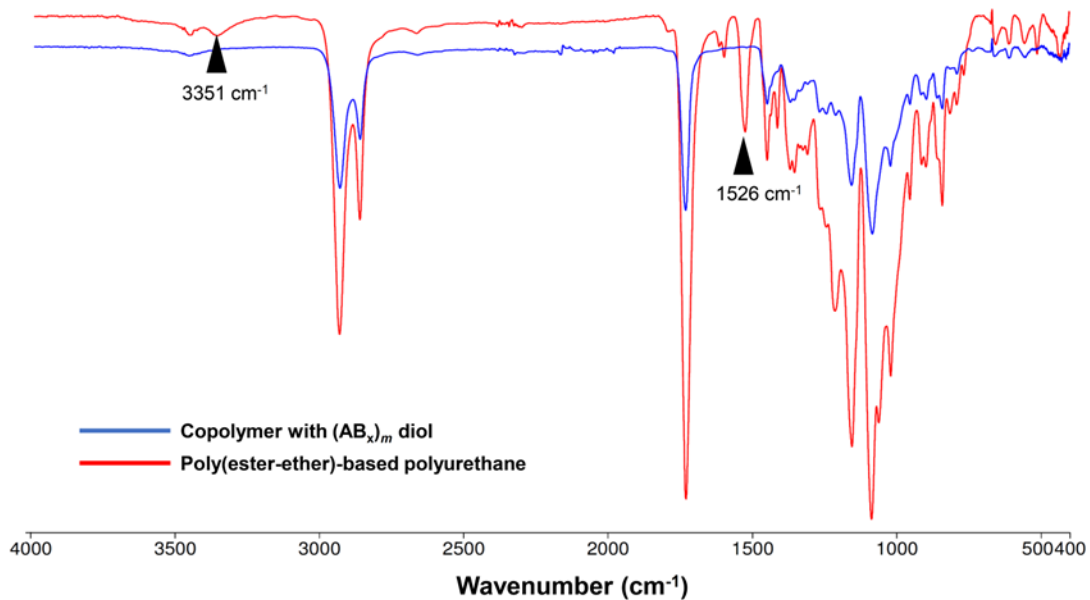

**Figure S57.** FT IR spectra of the copolymer with  $(\text{AB}_x)_m$  diol (blue line) and the obtained poly(ester-ether)-based polyurethane (red line).

## 2.4 Copolymerization of CHO, cyclic anhydrides, and THF or 1,4-dioxane by tin(II) octanoate

**Table S6.** Starting molecular weight and components of poly(ester-ether) in the degradation test.

| Entry | Polymers                                      | Polymer selectivity for THF or OX (%) <sup>a</sup> | Component (%) <sup>a</sup>         | $M_{n,GPC}$ (Da) <sup>b</sup> |
|-------|-----------------------------------------------|----------------------------------------------------|------------------------------------|-------------------------------|
|       |                                               |                                                    | $(AB)_n/(AB_x)_m/(AB_xC)_o/x_{av}$ |                               |
| 1     | Poly(PA- <i>alt</i> -CHO)                     | -                                                  | 100/-/-                            | 6,100                         |
| 2     | Poly(PA- <i>co</i> -CHO);(AB <sub>3,3</sub> ) | -                                                  | 3/97/-/3.3                         | 6,578                         |
| 3     | Poly(PA/CHO/OX)                               | 11                                                 | 8/81/11/2.7                        | 4,438                         |
| 4     | Poly(PA/CHO/THF)                              | 73                                                 | 4/23/73/2.5                        | 6,200                         |

<sup>a</sup>Determined by <sup>1</sup>H NMR spectroscopy (see ESI) <sup>b</sup>Obtained from GPC analysis using refractive index (RI) detector.

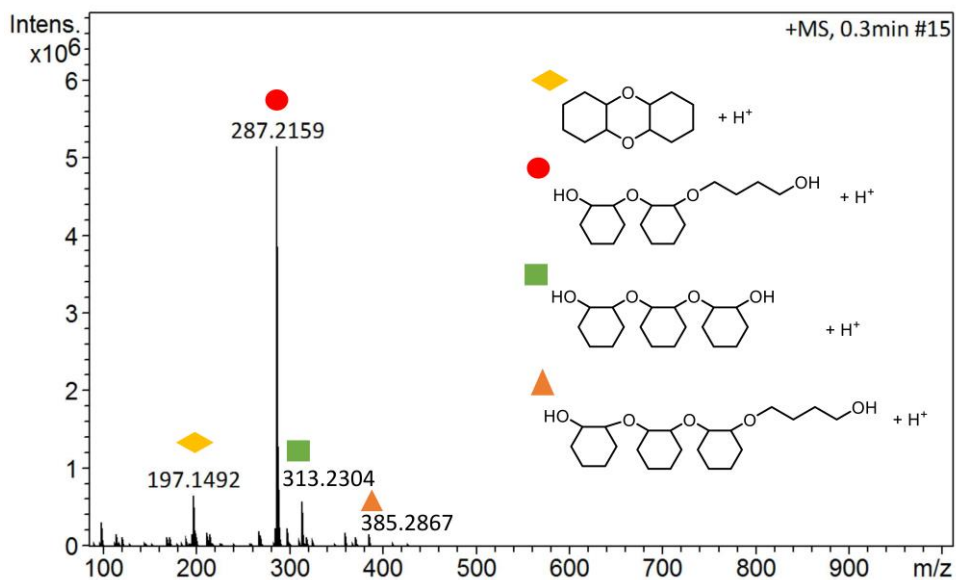

**Figure S58.** APCI mass spectrum of the hydrolyzed compositions of poly(PA/CHO/THF) (from Table S6, entry 4) under basic condition at 70 °C for 4 days.

## NMR spectrum of SA/CHO/THF copolymers

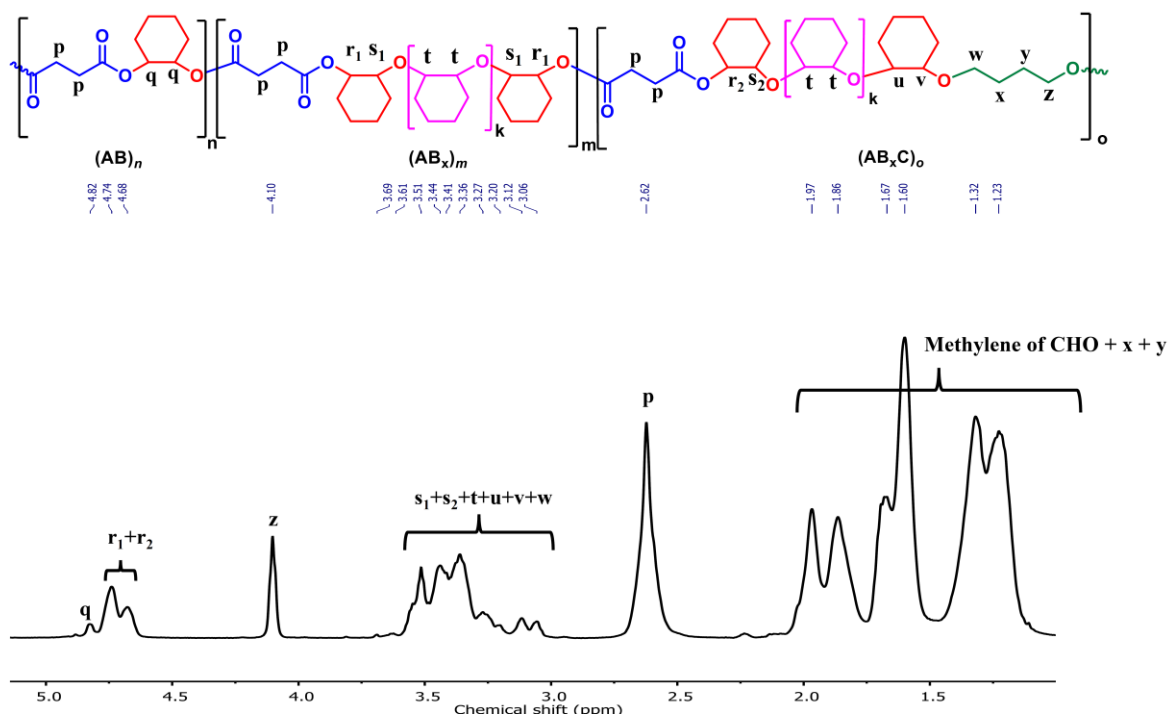

**Figure S59.**  $^1\text{H}$  NMR spectrum (600 MHz,  $\text{CDCl}_3$ , 30  $^\circ\text{C}$ ) of the copolymer from ROCOP of SA, CHO and THF using a SA/CHO/THF/ $\text{SnOct}_2$  molar ratio of 50:150:150:1 (Table 2, entry 3).

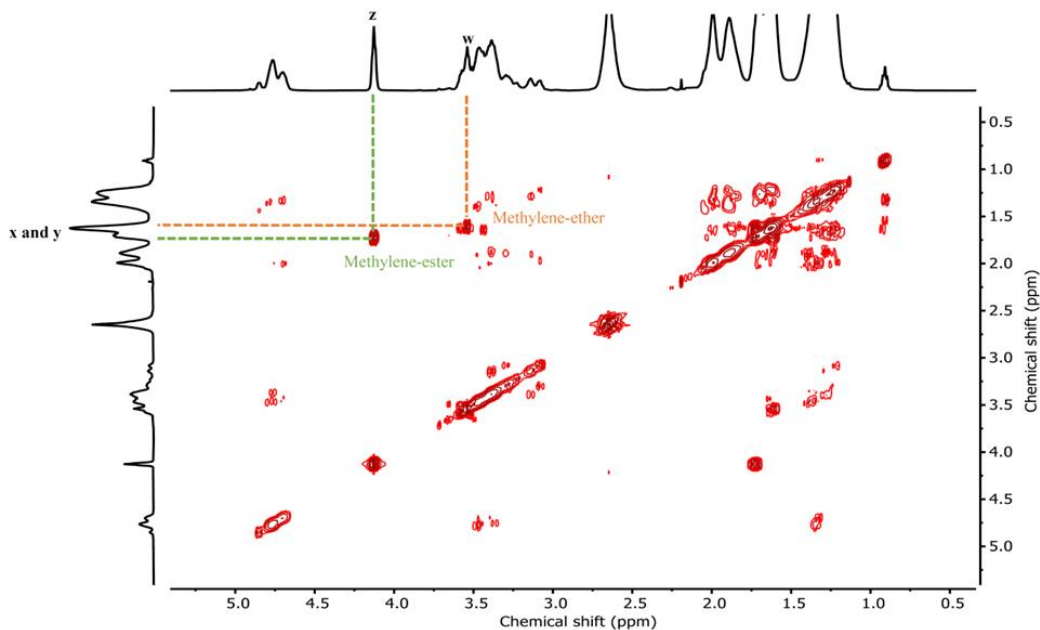

**Figure S60.** COSY-NMR spectrum (600 MHz,  $\text{CDCl}_3$ , 30  $^\circ\text{C}$ ) of the copolymer from ROCOP of SA, CHO and THF using a SA/CHO/THF/ $\text{SnOct}_2$  molar ratio of 50:150:150:1 (Table 2, entry 3).



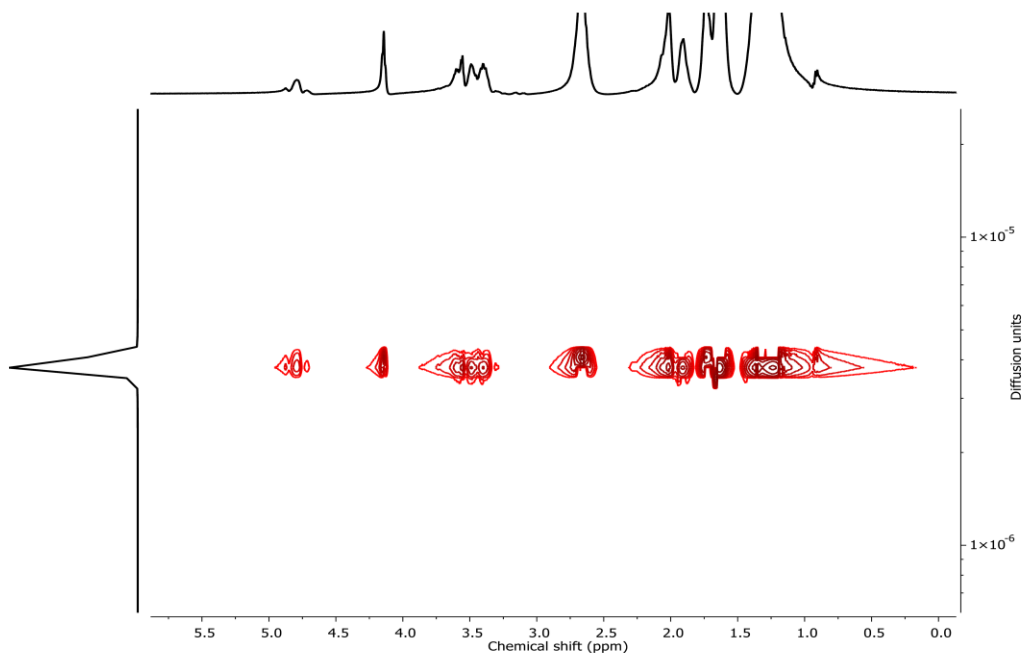

**Figure S61.** DOSY-NMR spectrum (600 MHz,  $\text{CDCl}_3$ , 30 °C) of the copolymer from ROCOP of SA, CHO and THF using a SA/CHO/THF/SnOct<sub>2</sub> molar ratio of 50:150:150:1 (Table 2, entry 3).

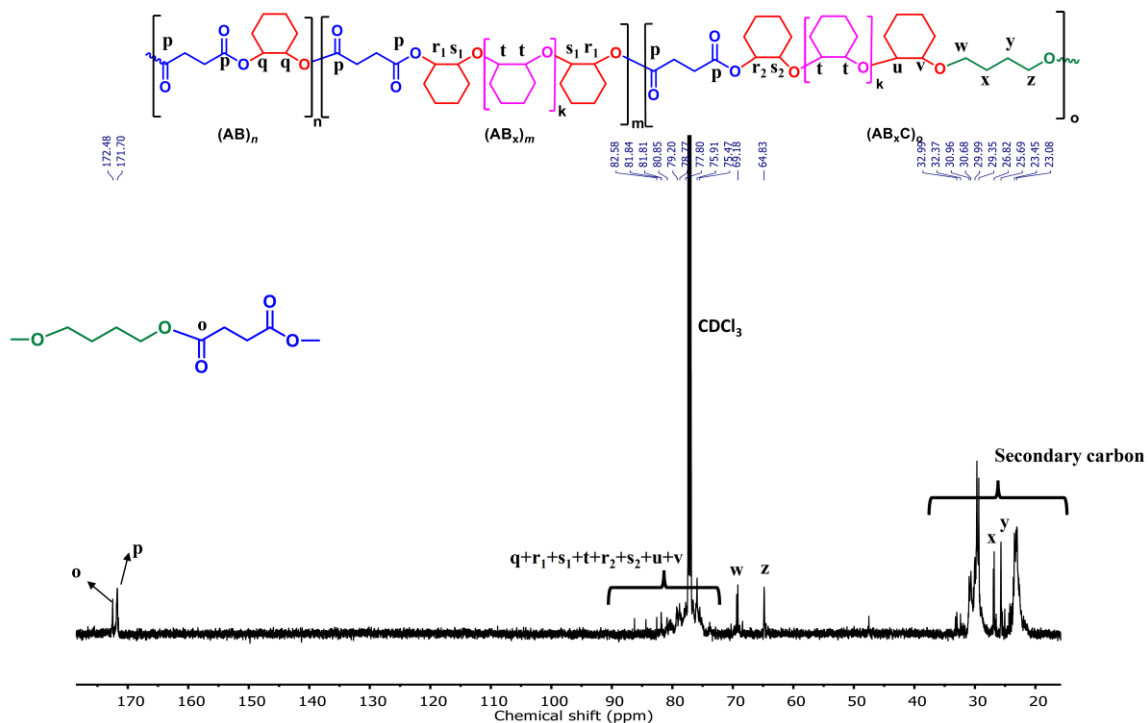

**Figure S62.**  $^{13}\text{C}$  NMR spectrum (150 MHz,  $\text{CDCl}_3$ , 30 °C) of the copolymer from ROCOP of SA, CHO and THF using a SA/CHO/THF/SnOct<sub>2</sub> molar ratio of 50:150:150:1 (Table 2, entry 3).

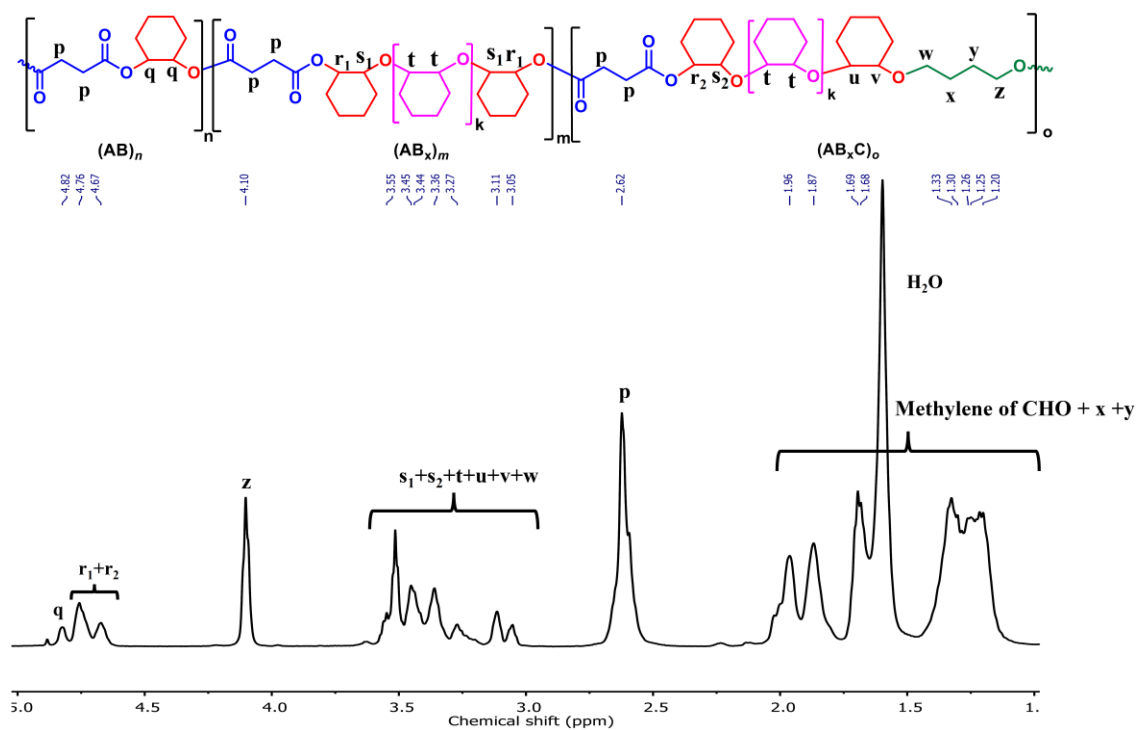

**Figure S63.**  $^1\text{H}$  NMR spectrum (600 MHz,  $\text{CDCl}_3$ , 30  $^\circ\text{C}$ ) of the copolymer from ROCOP of SA, CHO and THF using a SA/CHO/THF/ $\text{SnOct}_2$  molar ratio of 50:150:800:1 (Table 2, entry 4).

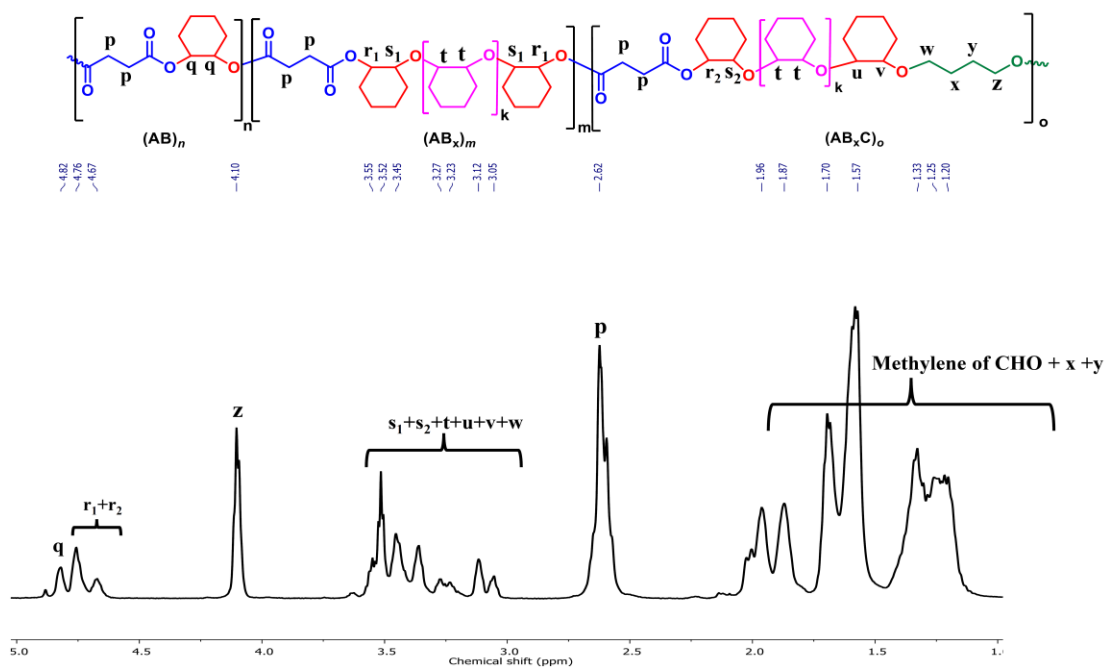

**Figure S64.**  $^1\text{H}$  NMR spectrum (600 MHz,  $\text{CDCl}_3$ , 30  $^\circ\text{C}$ ) of the copolymer from ROCOP of SA, CHO and THF using a SA/CHO/THF/ $\text{SnOct}_2$  molar ratio of 50:150:3000:1 (Table 2, entry 5).

## NMR spectrum of PA/CHO/THF copolymer

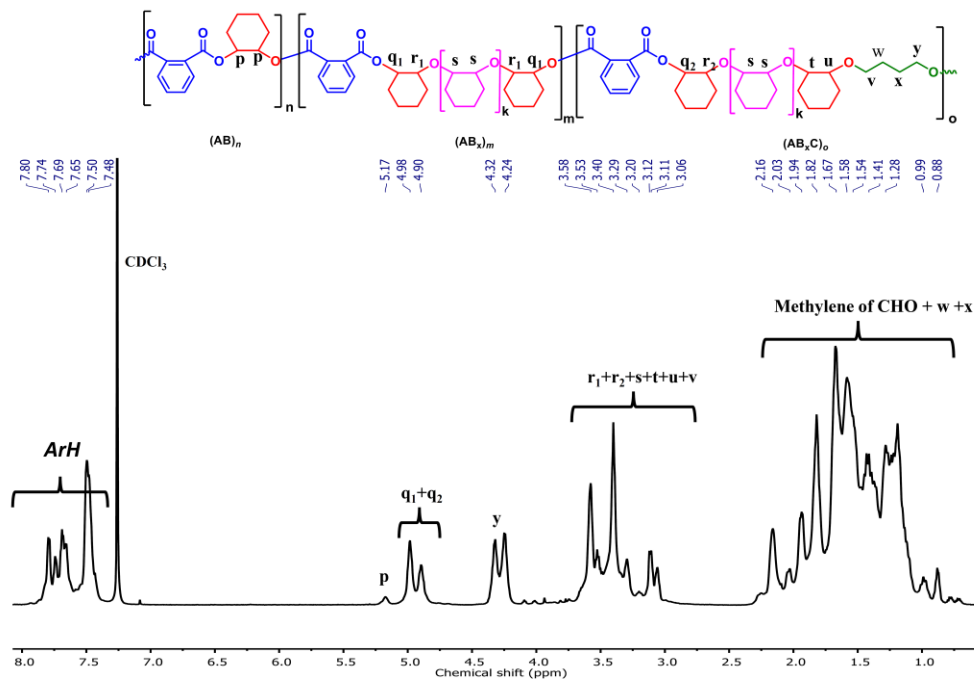

**Figure S65.** <sup>1</sup>H NMR spectrum (600 MHz, CDCl<sub>3</sub>, 30 °C) of the copolymer from ROCOP of PA, CHO and THF using a PA/CHO/THF/SnOct<sub>2</sub> molar ratio of 50:150:800:1 (Table 2, entry 6).

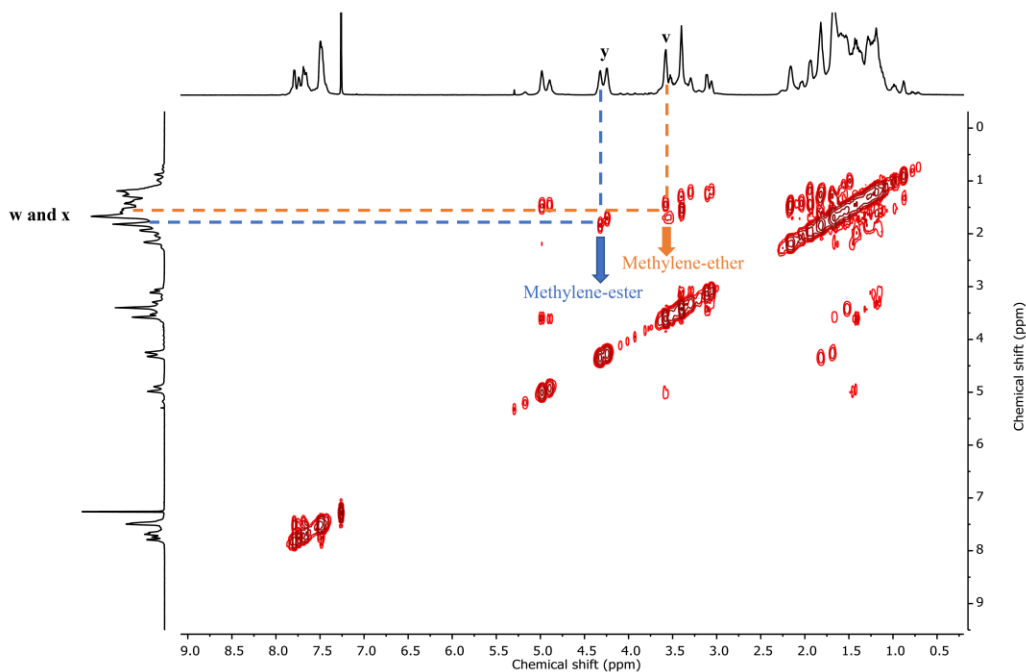

**Figure S66.** COSY-NMR spectrum (600 MHz, CDCl<sub>3</sub>, 30 °C) of the copolymer from ROCOP of PA, CHO and THF using a PA/CHO/THF/SnOct<sub>2</sub> molar ratio of 50:150:800:1 (Table 2, entry 6).

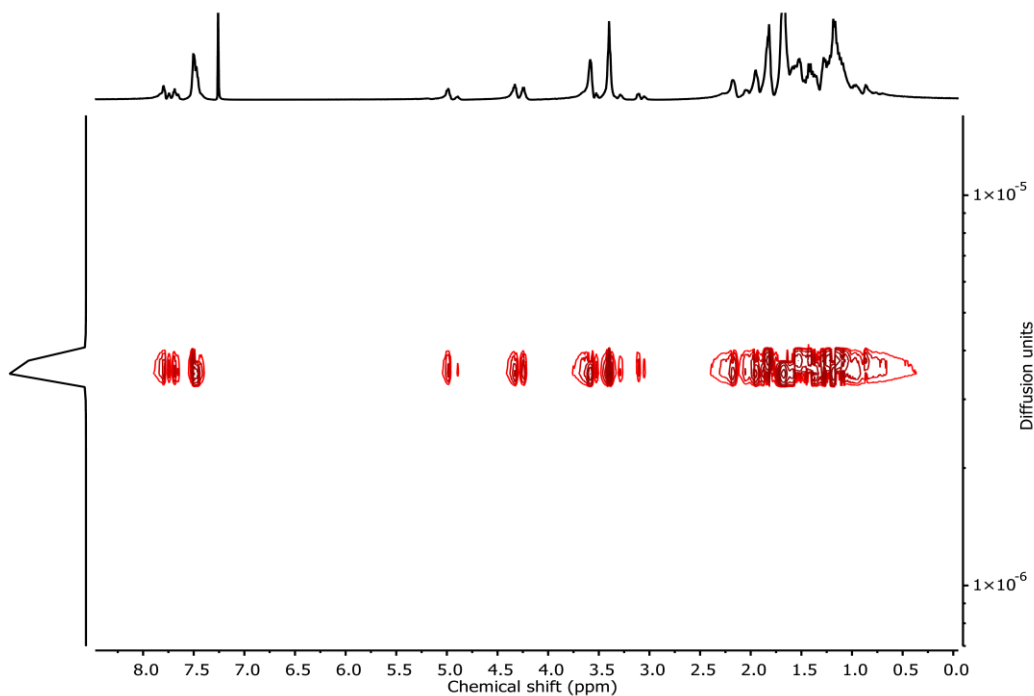

**Figure S67.** DOSY-NMR spectrum (600 MHz,  $\text{CDCl}_3$ , 30 °C) of the copolymer from ROCOP of PA, CHO and THF using a PA/CHO/THF/ $\text{SnOct}_2$  molar ratio of 50:150:800:1 (Table 2, entry 6).

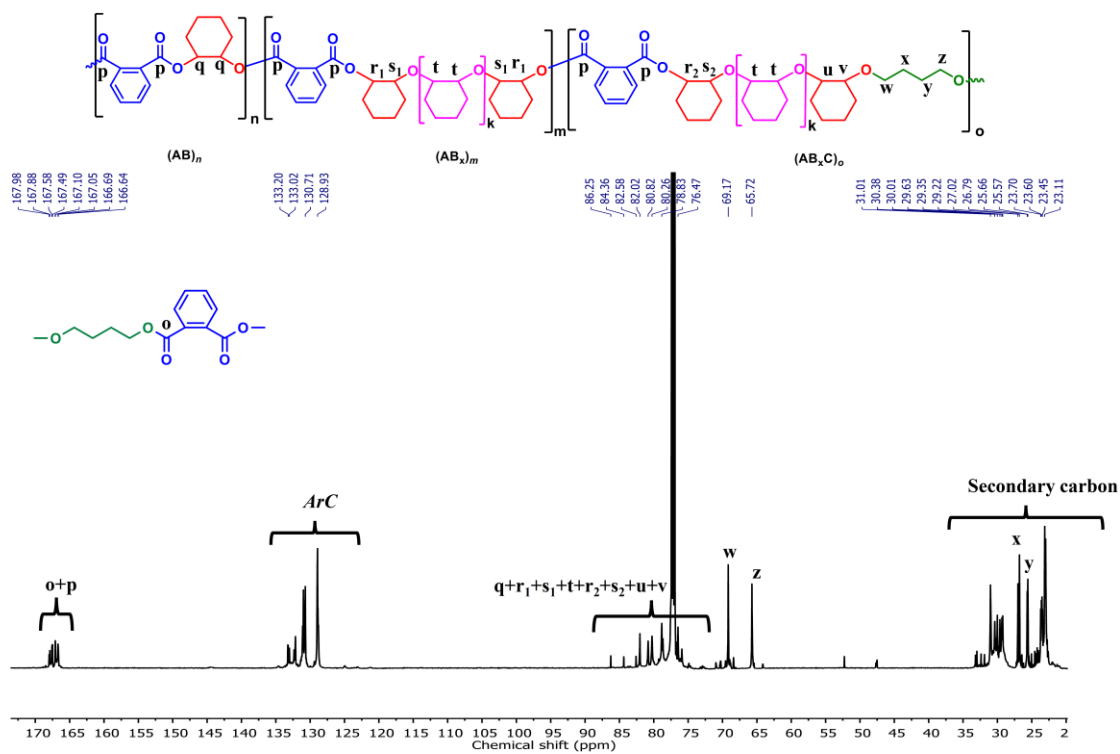

**Figure S68.**  $^{13}\text{C}$  NMR spectrum (150 MHz,  $\text{CDCl}_3$ , 30 °C) of the copolymer from ROCOP of PA, CHO and THF using a PA/CHO/THF/ $\text{SnOct}_2$  molar ratio of 50:150:800:1 (Table 2, entry 6).

## NMR spectrum of MA/CHO/THF copolymer

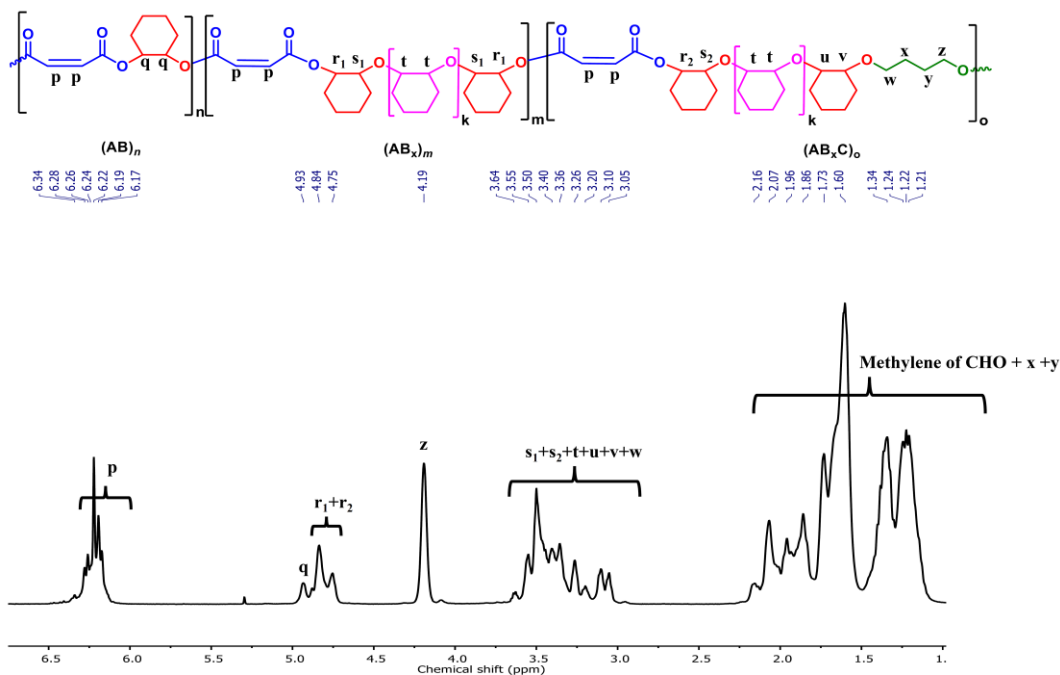

**Figure S69.**  $^1\text{H}$  NMR spectrum (600 MHz,  $\text{CDCl}_3$ , 30  $^\circ\text{C}$ ) of the copolymer from ROCOP of MA, CHO and THF using a MA/CHO/THF/ $\text{SnOct}_2$  molar ratio of 50:150:800:1 (Table 2, entry 7).

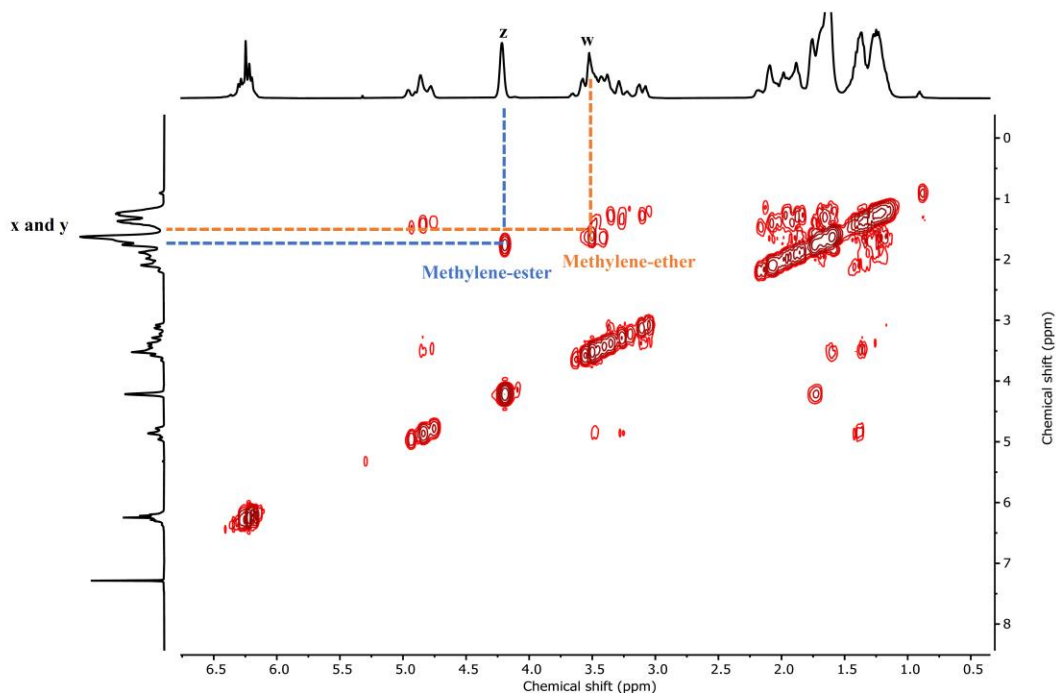

**Figure S70.** COSY-NMR spectrum (600 MHz,  $\text{CDCl}_3$ , 30  $^\circ\text{C}$ ) of the copolymer from ROCOP of MA, CHO and THF using a MA/CHO/THF/ $\text{SnOct}_2$  molar ratio of 50:150:800:1 (Table 2, entry 7).

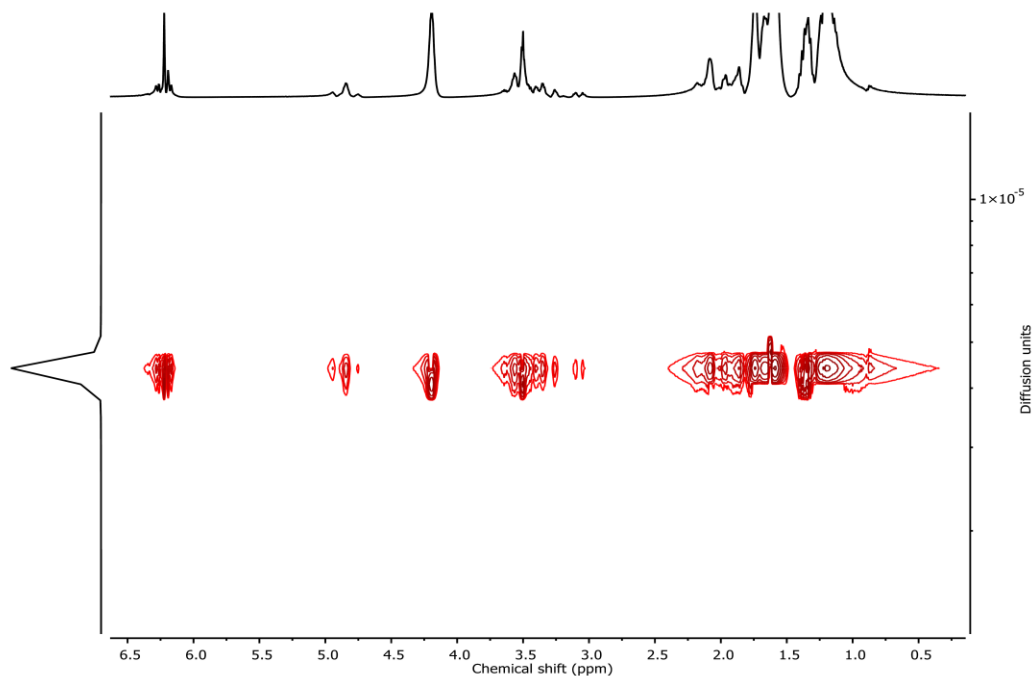

**Figure S71.** DOSY-NMR spectrum (600 MHz,  $\text{CDCl}_3$ , 30 °C) of the copolymer from ROCOP of MA, CHO and THF using a MA/CHO/THF/ $\text{SnOct}_2$  molar ratio of 50:150:800:1 (Table 2, entry 7).

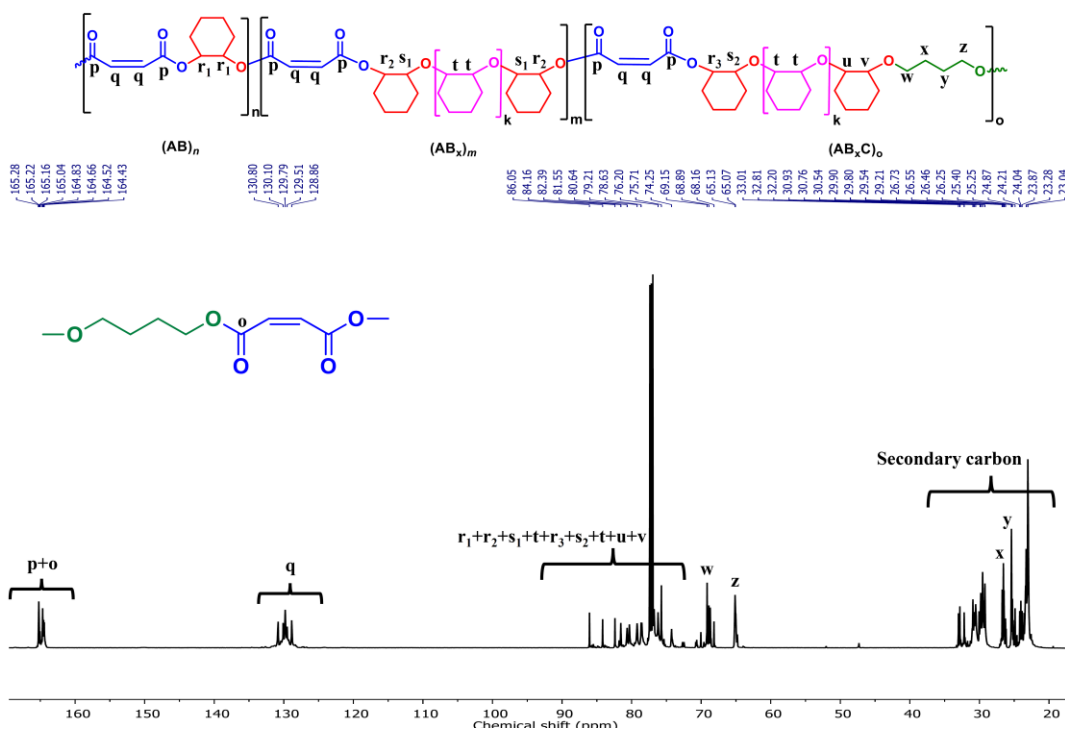

**Figure S72.**  $^{13}\text{C}$  NMR spectrum (150 MHz,  $\text{CDCl}_3$ , 30 °C) of the copolymer from ROCOP of MA, CHO and THF using a MA/CHO/THF/ $\text{SnOct}_2$  molar ratio of 50:150:800:1 (Table 2, entry 7).

## NMR spectrum of PA/CHO/1,4-dioxane copolymers

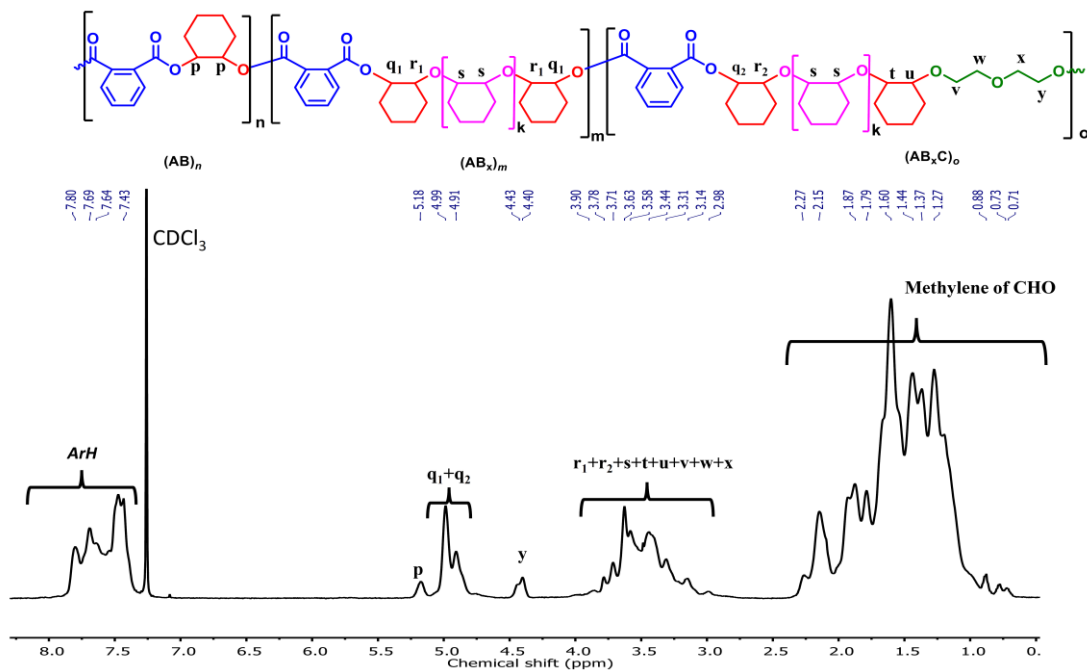

**Figure S73.** <sup>1</sup>H NMR spectrum (600 MHz, CDCl<sub>3</sub>, 30 °C) of the copolymer from ROCOP of PA, CHO and 1,4-dioxane using a PA/CHO/1,4-dioxane/SnOct<sub>2</sub> molar ratio of 50:150:800:1 (Table 2, entry 8).

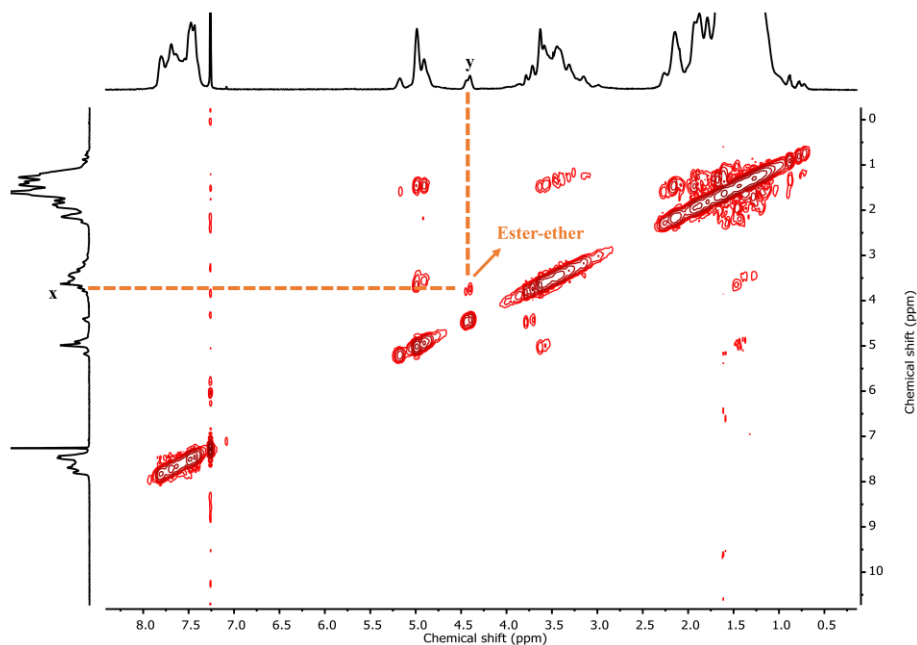

**Figure S74.** COSY-NMR spectrum (600 MHz, CDCl<sub>3</sub>, 30 °C) of the copolymer from ROCOP of PA, CHO and 1,4-dioxane using a PA/CHO/1,4-dioxane/SnOct<sub>2</sub> molar ratio of 50:150:800:1 (Table 2, entry 8).

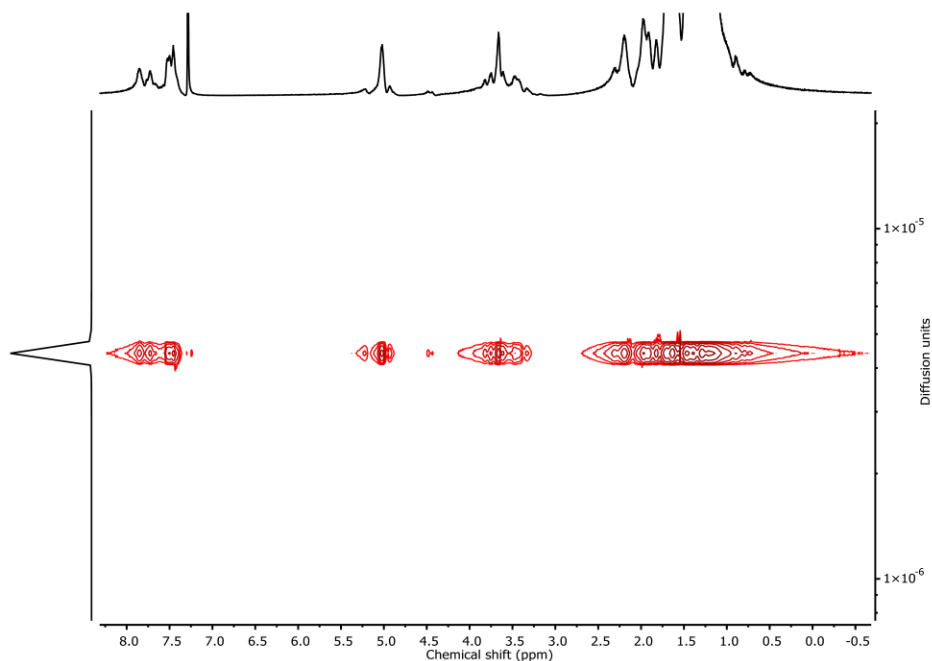

**Figure S75.** DOSY-NMR spectrum (600 MHz,  $\text{CDCl}_3$ , 30 °C) of the copolymer from ROCOP of PA, CHO and 1,4-dioxane using a PA/CHO/1,4-dioxane / $\text{SnOct}_2$  molar ratio of 50:150:800:1 (Table 2, entry 8).

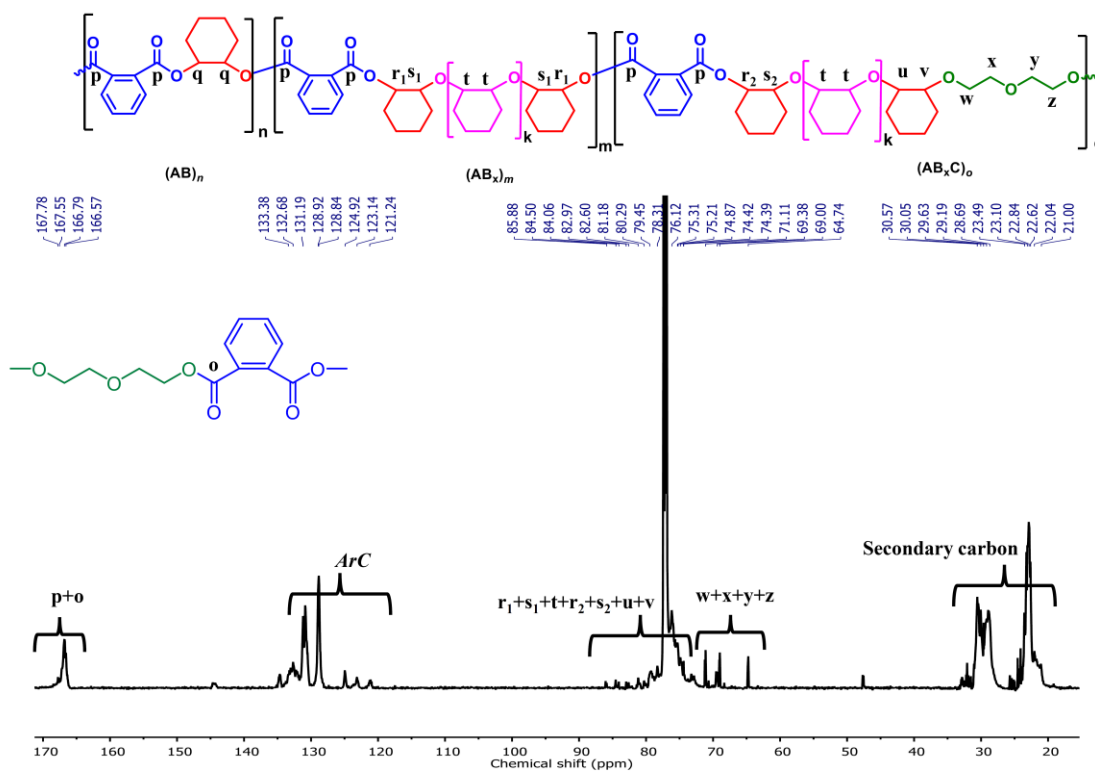

**Figure S76.**  $^{13}\text{C}$  NMR spectrum (150 MHz,  $\text{CDCl}_3$ , 30 °C) of the copolymer from ROCOP of PA, CHO and 1,4-dioxane using a PA/CHO/1,4-dioxane / $\text{SnOct}_2$  molar ratio of 50:150:800:1 (Table 2, entry 8).





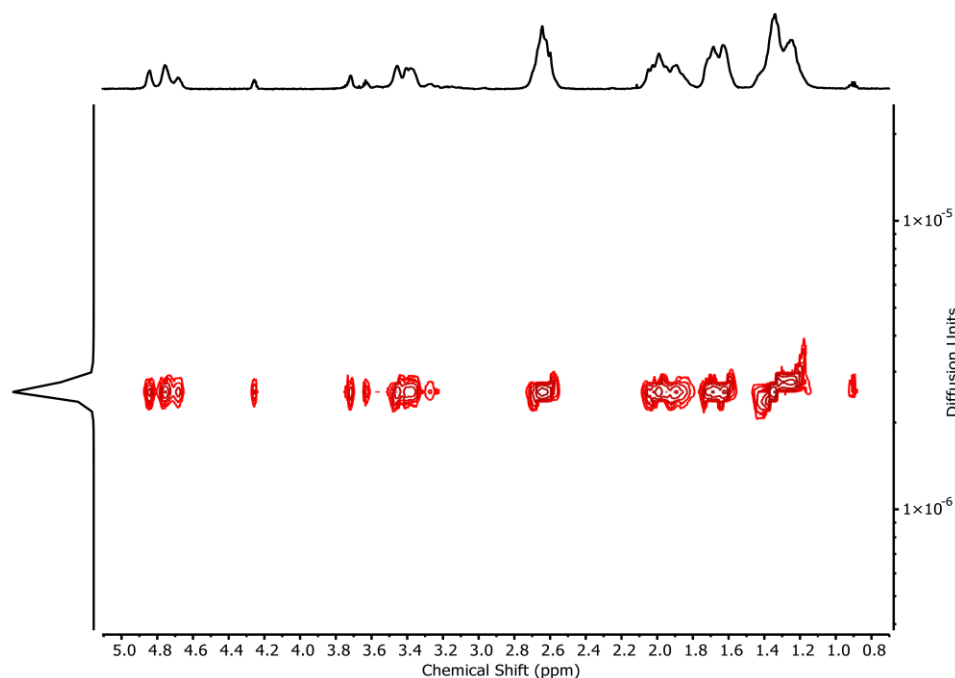

**Figure S79.** DOSY-NMR spectrum (600 MHz,  $\text{CDCl}_3$ , 30 °C) of the copolymer from ROCOP of SA, CHO and 1,4-dioxane using a SA/CHO/1,4-dioxane / $\text{SnOct}_2$  molar ratio of 50:150:800:1 (Table 2, entry 9).

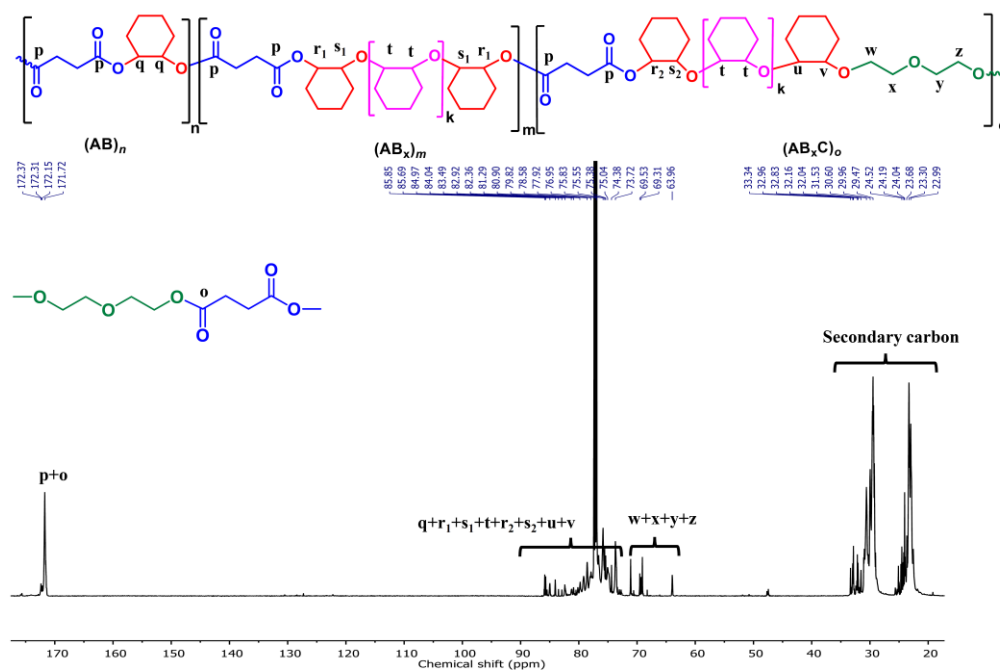

**Figure S80.**  $^{13}\text{C}$  NMR spectrum (150 MHz,  $\text{CDCl}_3$ , 30 °C) of the copolymer from ROCOP of SA, CHO and 1,4-dioxane using a SA/CHO/THF/ $\text{SnOct}_2$  molar ratio of 50:150:800:1 (Table 2, entry 9).

## DSC measurements

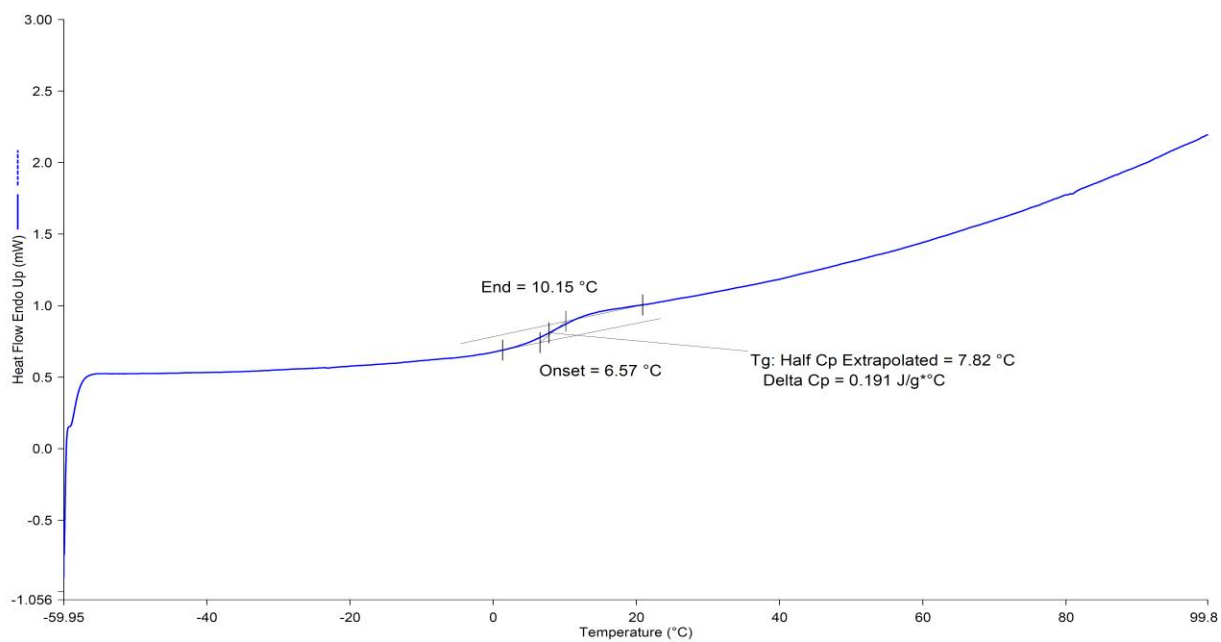

**Figure S81.** DSC data of polyester from copolymerization of CHO, SA and THF (Table 2, entry 3).

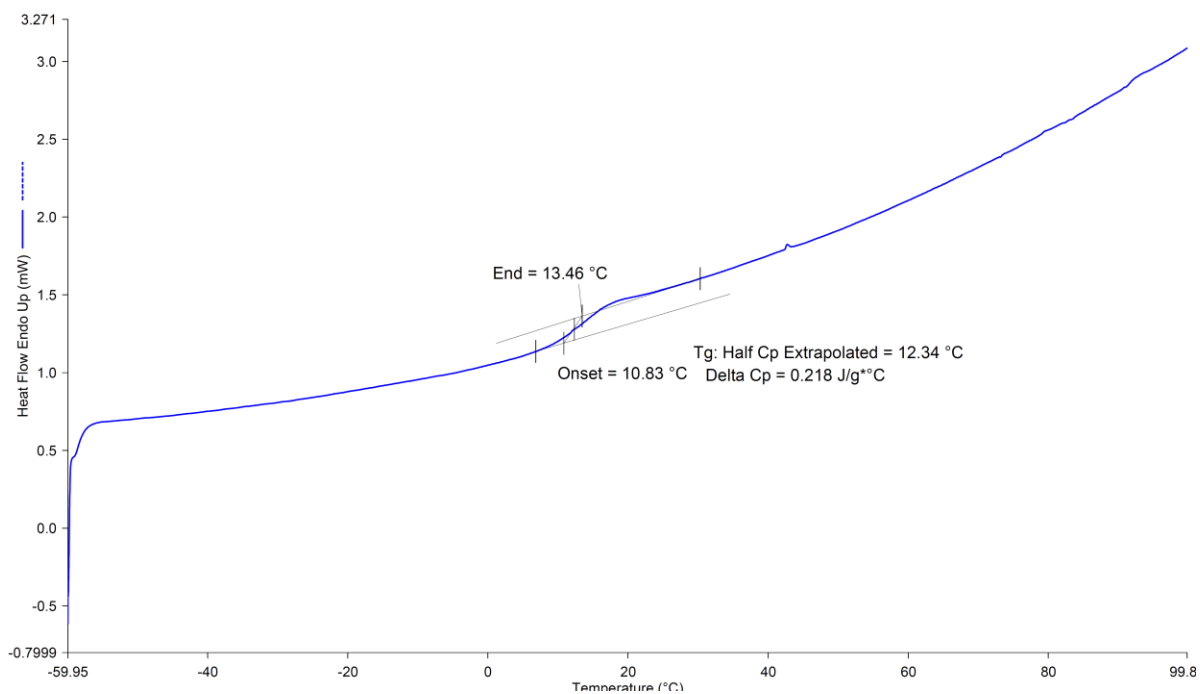

**Figure S82.** DSC data of polyester from copolymerization of CHO, SA and THF (Table 2, entry 4).

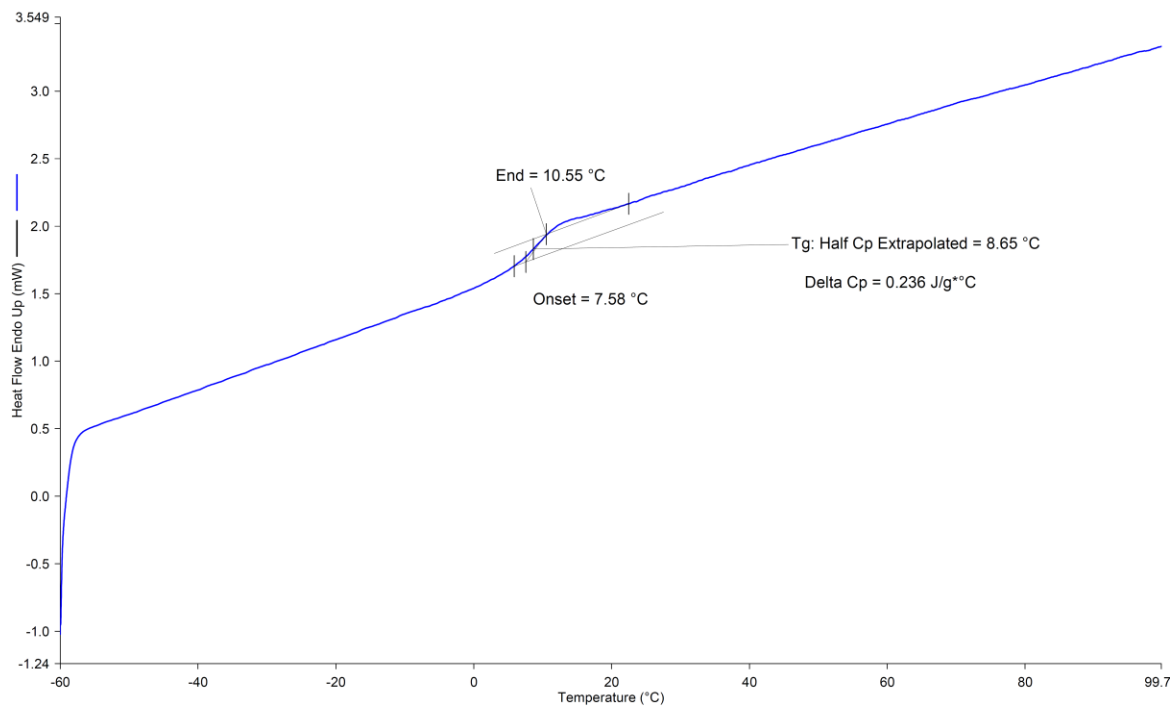

**Figure S83.** DSC data of polyester from copolymerization of CHO, SA and THF (Table 2, entry 5).

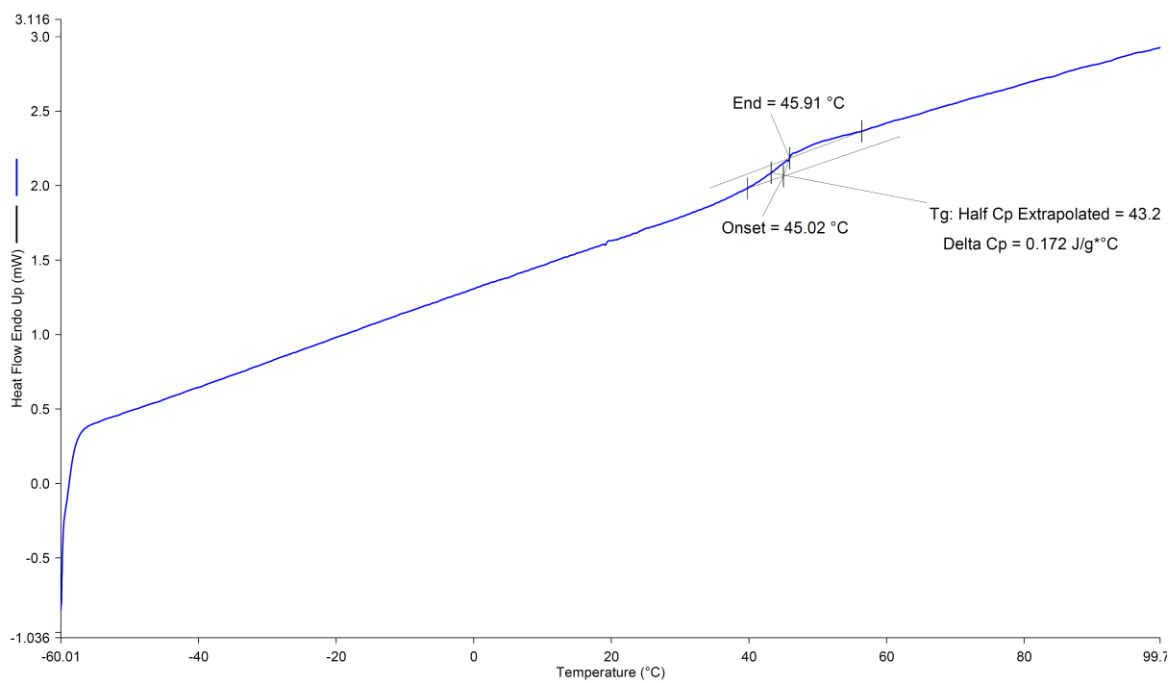

**Figure S84.** DSC data of polyester from copolymerization of CHO, PA and THF (Table 2, entry 6).

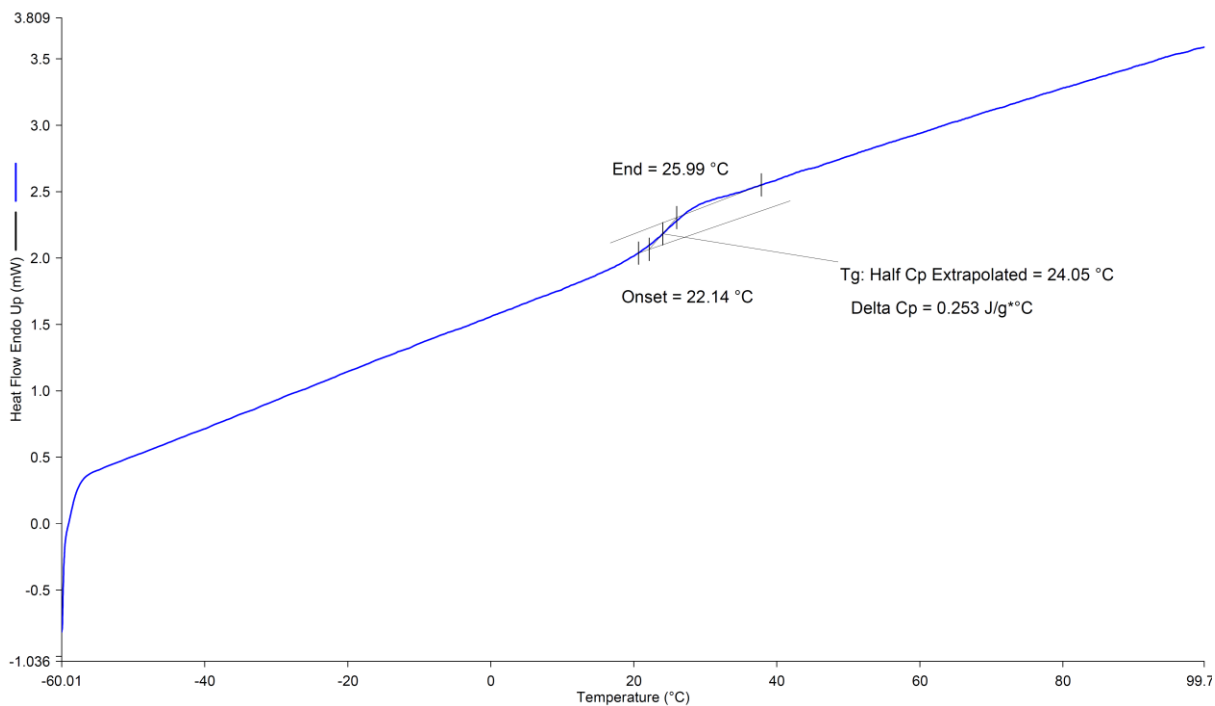

**Figure S85.** DSC data of polyester from copolymerization of CHO, MA and THF (Table 2, entry 7).

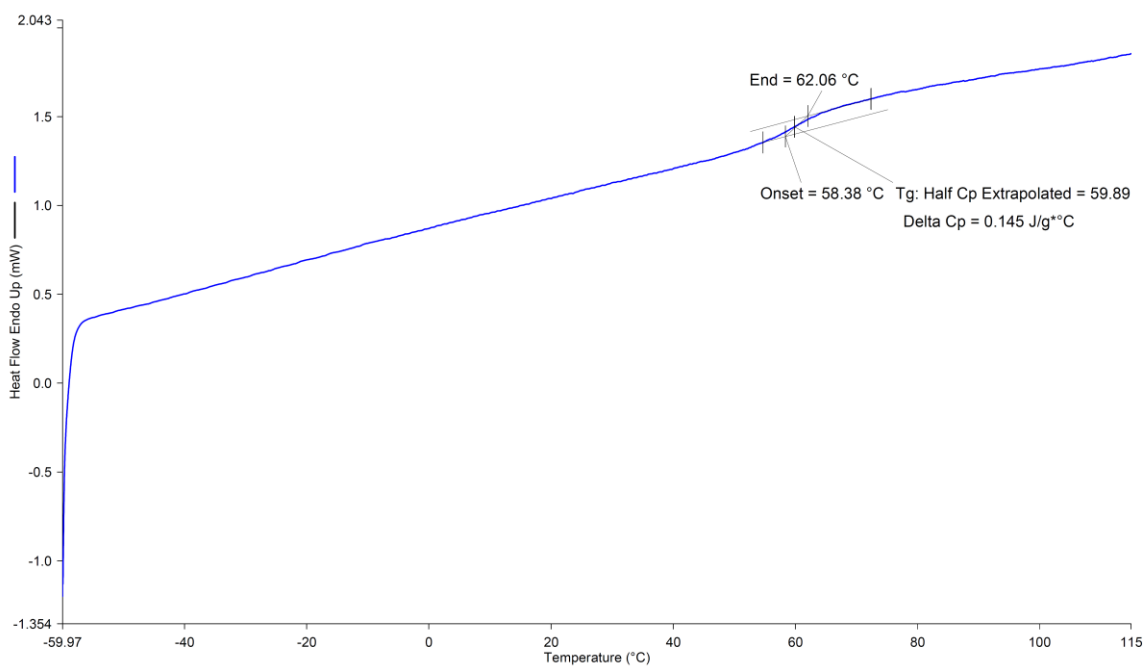

**Figure S86.** DSC data of polyester from copolymerization of CHO, PA and 1,4-dioxane (Table 2, entry 8).

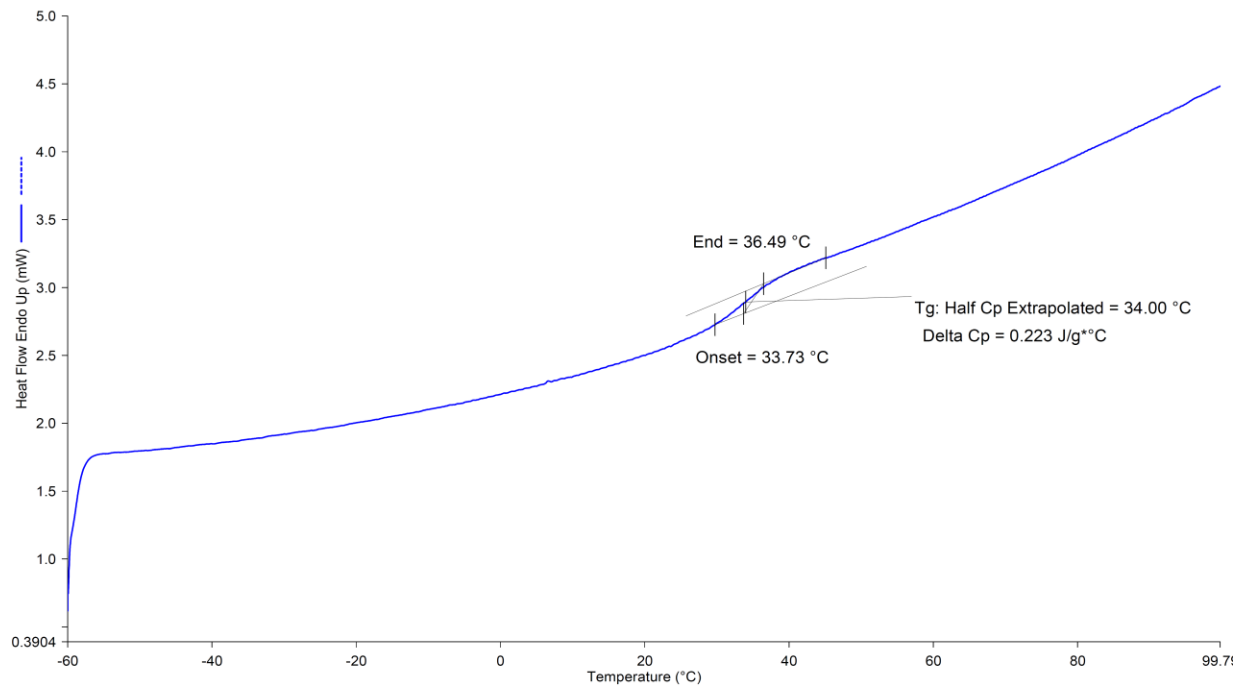

**Figure S87.** DSC data of polyester from copolymerization of CHO, SA and 1,4-dioxane (Table 2, entry 9).
